# Supplementary material for: HSPG2 Mutation Association with Immune Checkpoint Inhibitor Outcome in Melanoma and Non-Small Cell Lung Cancer
Source: MDPI journal article supplement (doi:10.3390/cancers14143495), 2022-07-19
Supplement: s1 [file s1]

# Supplementary Figures

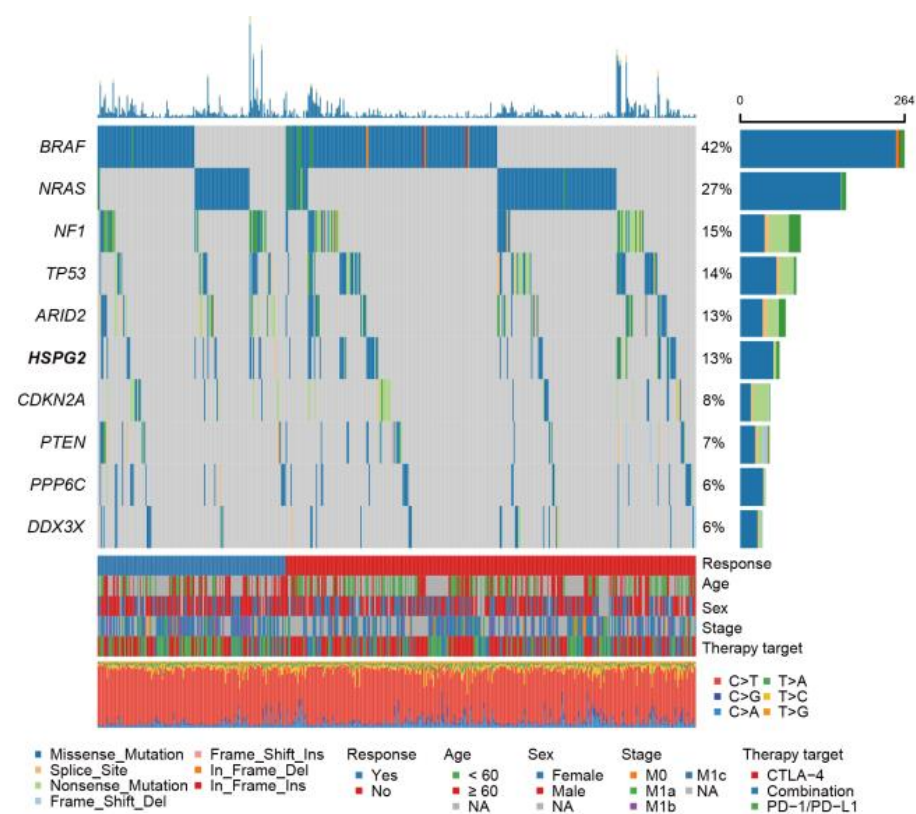

**Figure S1.** Mutational patterns of *HSPG2* and common melanoma driver genes illustrated with waterfall plot.

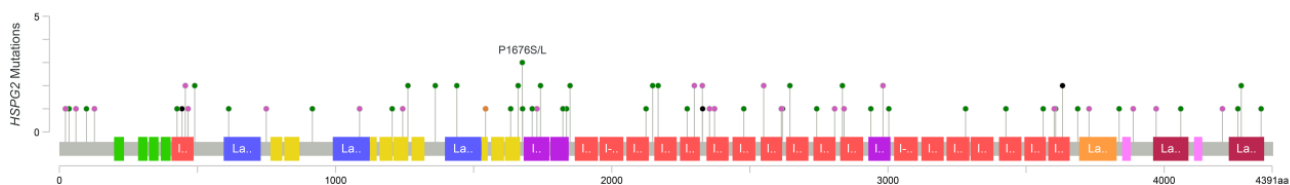

**Figure S2.** Detailed amino acid changes induced by *HSPG2* mutations in the integrated melanoma cohort.

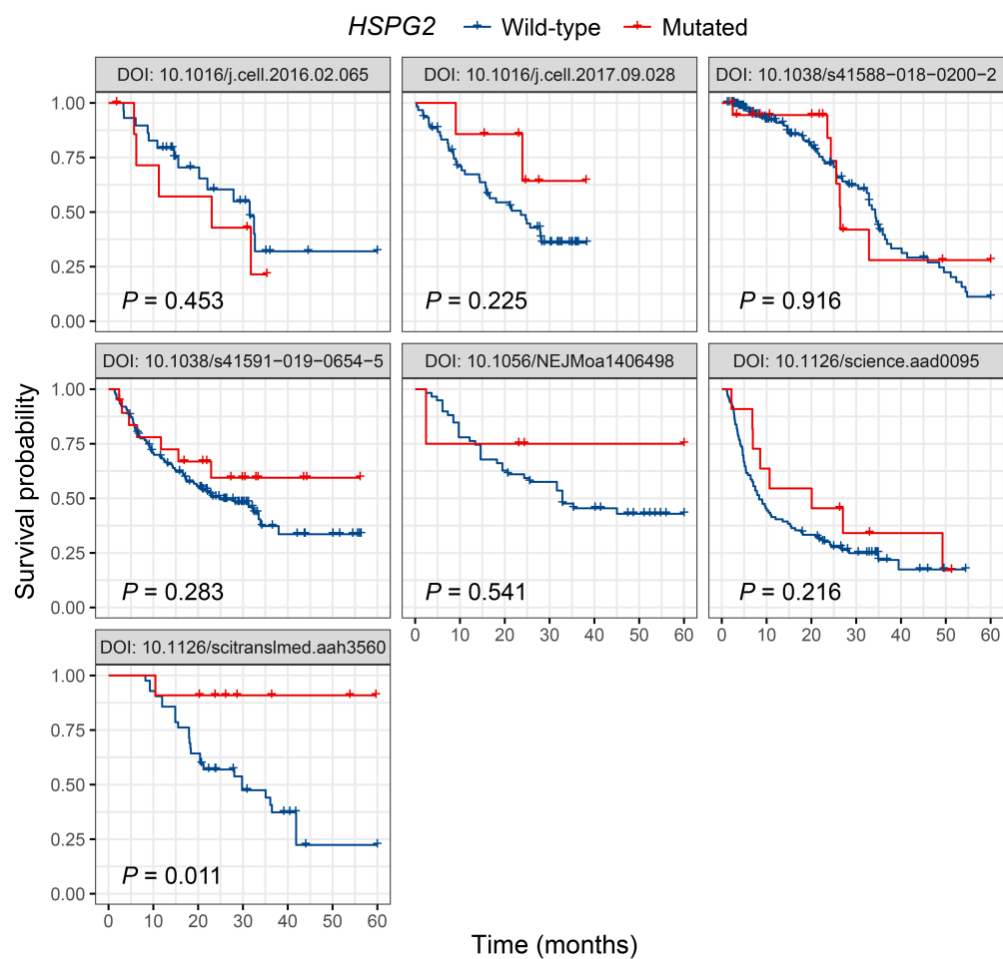

**Figure S3.** Kaplan-Meier survival analyses of *HSPG2* mutations in individual ICI-treated melanoma cohorts.

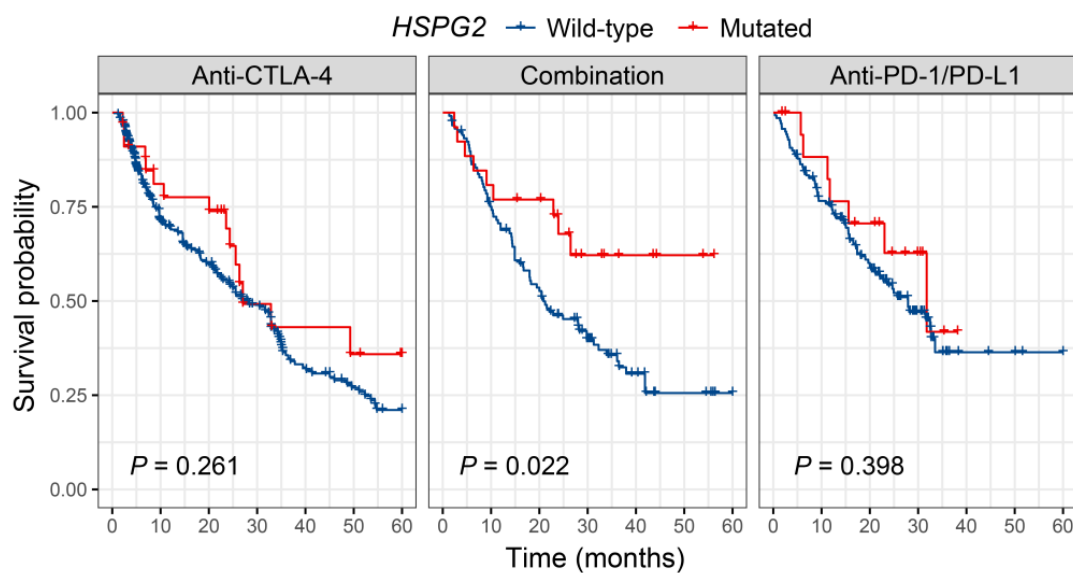

**Figure S4.** Kaplan-Meier survival analyses of *HSPG2* mutations in distinct ICI treatment types in melanoma.

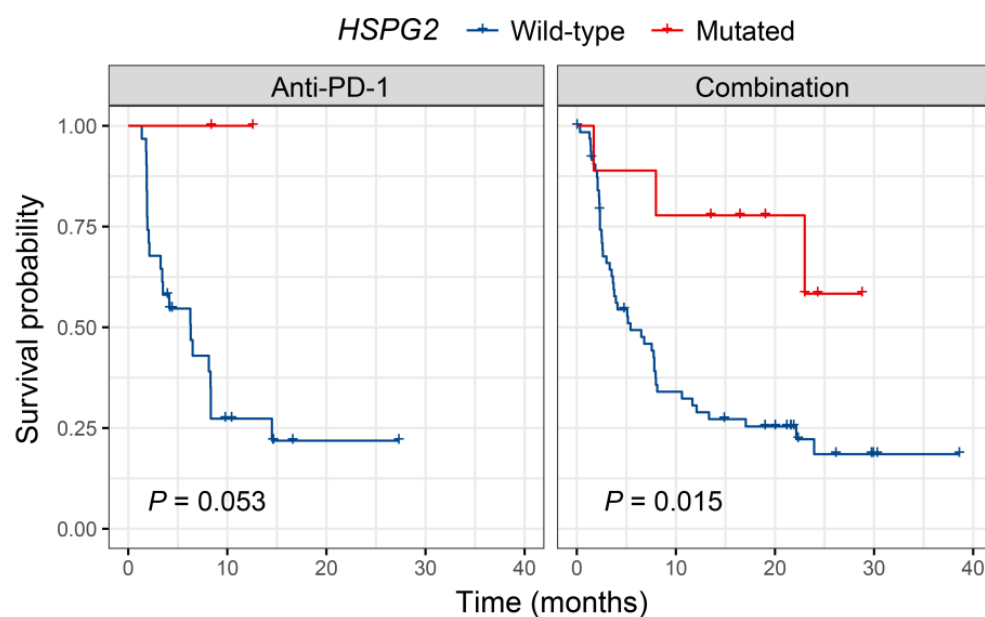

**Figure S5.** Kaplan-Meier survival analyses of *HSPG2* mutations in individual ICI-treated NSCLC cohorts.

| <i>HSPG2</i> mutated pathways      | Gene ranks | NES   | FDR     |
|------------------------------------|------------|-------|---------|
| HALLMARK_G2M_CHECKPOINT            |            | 2.19  | 8.5e-04 |
| HALLMARK_E2F_TARGETS               |            | 2.29  | 8.5e-04 |
| HALLMARK_MITOTIC_SPINDLE           |            | 2.04  | 8.5e-04 |
| HALLMARK_MYC_TARGETS_V1            |            | 1.81  | 8.5e-04 |
| HALLMARK_INTERFERON_GAMMA_RESPONSE |            | 1.72  | 8.5e-04 |
| HALLMARK_INTERFERON_ALPHA_RESPONSE |            | 2.07  | 8.5e-04 |
| HALLMARK_DNA_REPAIR                |            | 1.48  | 1.3e-02 |
| HALLMARK_UNFOLDED_PROTEIN_RESPONSE |            | 1.52  | 1.3e-02 |
| HALLMARK_MTORC1_SIGNALING          |            | 1.42  | 1.5e-02 |
| HALLMARK_TNFA_SIGNALING_VIA_NFKB   |            | 1.41  | 1.5e-02 |
| HALLMARK_PI3K_AKT_MTOR_SIGNALING   |            | 1.51  | 1.5e-02 |
| HALLMARK_ANDROGEN_RESPONSE         |            | 1.46  | 3.0e-02 |
| HALLMARK_ALLOGRAFT_REJECTION       |            | 1.36  | 3.0e-02 |
| HALLMARK_SPERMATOGENESIS           |            | 1.37  | 5.1e-02 |
| HALLMARK_MYC_TARGETS_V2            |            | 1.46  | 5.4e-02 |
| HALLMARK_CHOLESTEROL_HOMEOSTASIS   |            | 1.41  | 6.8e-02 |
| HALLMARK_PROTEIN_SECRETION         |            | 1.36  | 7.9e-02 |
| HALLMARK_COMPLEMENT                |            | 1.25  | 1.2e-01 |
| HALLMARK_UV_RESPONSE_DN            |            | 1.28  | 1.2e-01 |
| HALLMARK_HYPOXIA                   |            | 1.25  | 1.2e-01 |
| HALLMARK_ANGIOGENESIS              |            | -1.89 | 1.6e-02 |

**Figure S6.** Significantly enriched signaling pathways in *HSPG2* mutated subgroups in melanoma. Immune response pathways were highlighted with green.

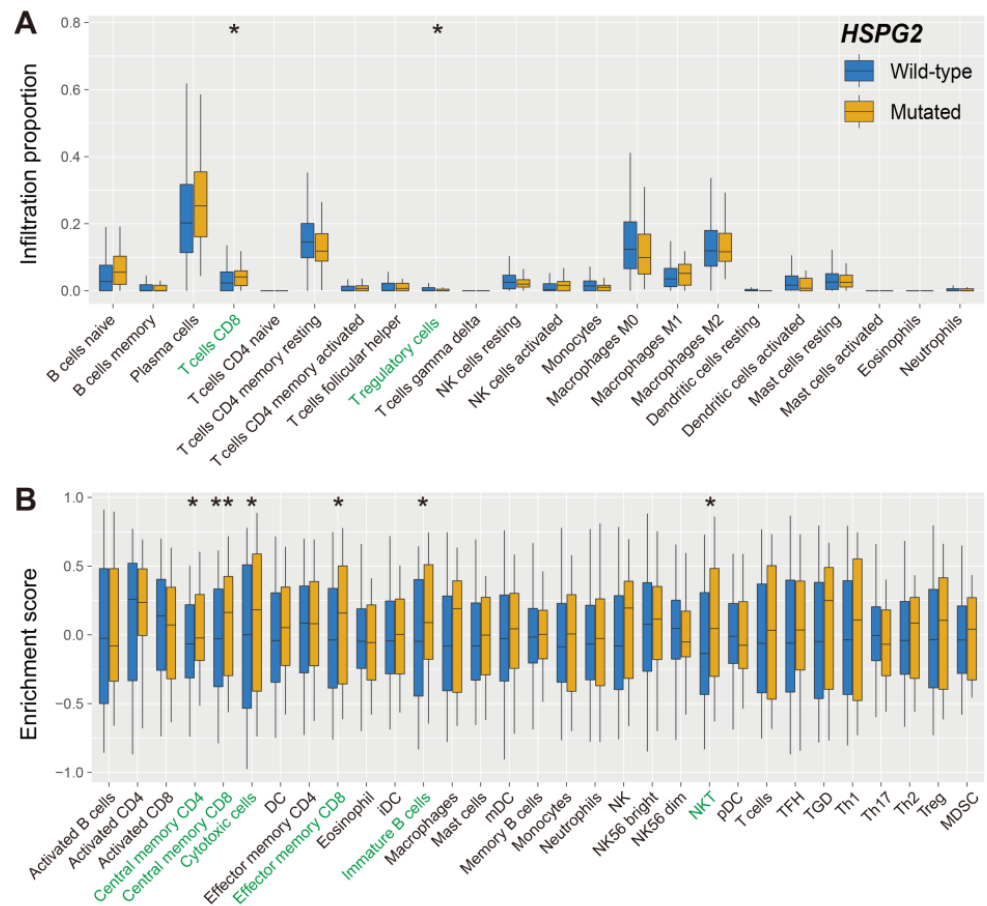

**Figure S7.** Immune infiltration associated with *HSPG2* mutations in NSCLC. (A) Distinct infiltration of 22 immunocytes of *HSPG2* mutated and wild-type groups evaluated with CIBERSORT algorithm. Immunocytes highlighted with green are significantly differentially infiltrated. (B) Distinct infiltration of 31 immunocytes of *HSPG2* two groups evaluated with Angelo *et al.* method.

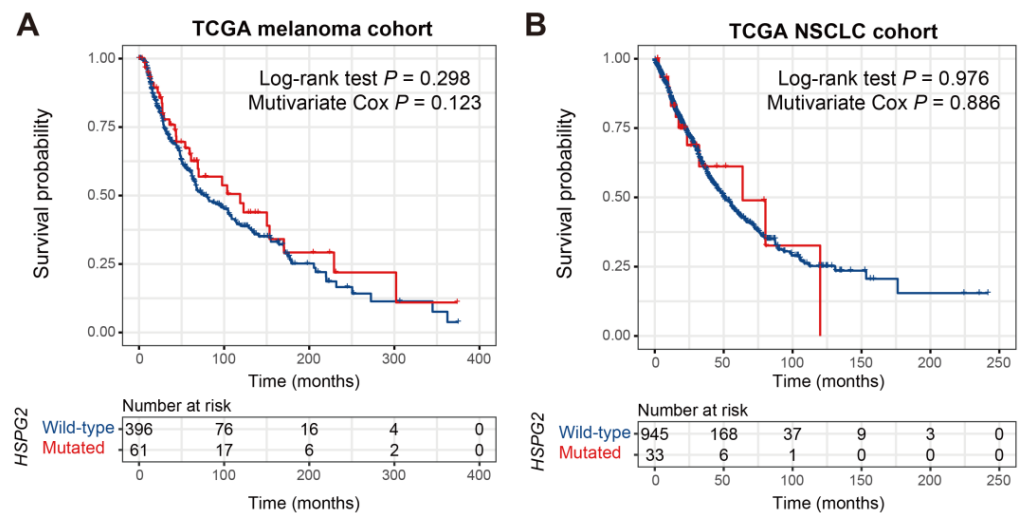

**Figure S8.** Prognostic capacities of *HSPG2* mutations in (A) melanoma and (B) NSCLC patients derived from the TCGA project.
