# Supplementary material for: HSPG2 Mutation Association with Immune Checkpoint Inhibitor Outcome in Melanoma and Non-Small Cell Lung Cancer
Source: Cancers (Basel). 2022 Jul 19;14(14):3495. doi: 10.3390/cancers14143495 (PMC9315784; doi:10.3390/cancers14143495)
Supplement: Supplementary file 1 [file cancers-14-03495-s001.zip › Supplementary Tables.xlsx]

## Sheet: Table S1
Table S1 Clinical characteristics of 631 pooled melanoma patients treated with ICI agents
Sample ID	DOI	Age	Sex	Stage	Overall survival (months)	Overall survival status	Response status	Therapy target	Therapy drug	Sequencing platform
Patient1	10.1038/s41591-019-0654-5	NA	Female	M1c	9.43333	Dead	PD	CTLA-4 plus PD-1/PD-L1	Ipilimumab+Pembrolizumab	HiSeq(Illumina)
Patient10	10.1038/s41591-019-0654-5	NA	Female	M1c	37.9667	Dead	CR/PR	CTLA-4 plus PD-1/PD-L1	Ipilimumab+Pembrolizumab	HiSeq(Illumina)
Patient100	10.1038/s41591-019-0654-5	NA	Female	M1c	31.2667	Dead	CR/PR	CTLA-4 plus PD-1/PD-L1	Ipilimumab+Nivolumab	HiSeq(Illumina)
Patient104	10.1038/s41591-019-0654-5	NA	Female	M1c	26.3	Alive	CR/PR	PD-1/PD-L1	Pembrolizumab	HiSeq(Illumina)
Patient105	10.1038/s41591-019-0654-5	NA	Female	M1c	17.3667	Dead	MR	PD-1/PD-L1	Pembrolizumab	HiSeq(Illumina)
Patient106	10.1038/s41591-019-0654-5	NA	Female	M1c	26	Alive	CR/PR	PD-1/PD-L1	Pembrolizumab	HiSeq(Illumina)
Patient11	10.1038/s41591-019-0654-5	NA	Female	M1c	5.33333	Dead	PD	CTLA-4 plus PD-1/PD-L1	Ipilimumab+Pembrolizumab	HiSeq(Illumina)
Patient110	10.1038/s41591-019-0654-5	NA	Female	M1c	16.8667	Alive	PD	PD-1/PD-L1	Pembrolizumab	HiSeq(Illumina)
Patient112	10.1038/s41591-019-0654-5	NA	Female	M1c	17.3667	Dead	PD	PD-1/PD-L1	Nivolumab	HiSeq(Illumina)
Patient116	10.1038/s41591-019-0654-5	NA	Female	M1c	3.93333	Dead	PD	PD-1/PD-L1	Nivolumab	HiSeq(Illumina)
Patient117	10.1038/s41591-019-0654-5	NA	Female	M1c	9.83333	Dead	PD	CTLA-4 plus PD-1/PD-L1	Ipilimumab+Pembrolizumab	HiSeq(Illumina)
Patient118	10.1038/s41591-019-0654-5	NA	Female	M1c	43.8667	Alive	CR/PR	CTLA-4 plus PD-1/PD-L1	Ipilimumab+Pembrolizumab	HiSeq(Illumina)
Patient119	10.1038/s41591-019-0654-5	NA	Female	M1c	8.66667	Dead	PD	CTLA-4 plus PD-1/PD-L1	Ipilimumab+Pembrolizumab	HiSeq(Illumina)
Patient120	10.1038/s41591-019-0654-5	NA	Female	M1c	43.7	Alive	CR/PR	CTLA-4 plus PD-1/PD-L1	Ipilimumab+Pembrolizumab	HiSeq(Illumina)
Patient121	10.1038/s41591-019-0654-5	NA	Female	M1c	43.5333	Alive	CR/PR	CTLA-4 plus PD-1/PD-L1	Ipilimumab+Pembrolizumab	HiSeq(Illumina)
Patient130	10.1038/s41591-019-0654-5	NA	Female	M1c	6.4	Dead	PD	PD-1/PD-L1	Nivolumab	HiSeq(Illumina)
Patient137	10.1038/s41591-019-0654-5	NA	Female	M1c	25.7333	Alive	CR/PR	PD-1/PD-L1	Pembrolizumab	HiSeq(Illumina)
Patient14	10.1038/s41591-019-0654-5	NA	Female	M1b	6.2	Dead	PD	PD-1/PD-L1	Pembrolizumab	HiSeq(Illumina)
Patient141	10.1038/s41591-019-0654-5	NA	Female	M1c	29.1667	Alive	CR/PR	PD-1/PD-L1	Nivolumab	HiSeq(Illumina)
Patient142	10.1038/s41591-019-0654-5	NA	Female	M1a	33.2	Alive	SD	PD-1/PD-L1	Pembrolizumab	HiSeq(Illumina)
Patient146	10.1038/s41591-019-0654-5	NA	Female	M1c	20.4	Alive	CR/PR	PD-1/PD-L1	Pembrolizumab	HiSeq(Illumina)
Patient148	10.1038/s41591-019-0654-5	NA	Female	M1a	26.4	Alive	CR/PR	PD-1/PD-L1	Pembrolizumab	HiSeq(Illumina)
Patient15	10.1038/s41591-019-0654-5	NA	Female	M1c	4.96667	Dead	CR/PR	CTLA-4 plus PD-1/PD-L1	Ipilimumab+Pembrolizumab	HiSeq(Illumina)
Patient154	10.1038/s41591-019-0654-5	NA	Female	M0	21.1667	Alive	SD	PD-1/PD-L1	Pembrolizumab	HiSeq(Illumina)
Patient159	10.1038/s41591-019-0654-5	NA	Female	M1c	9.6	Alive	SD	CTLA-4 plus PD-1/PD-L1	Ipilimumab+Pembrolizumab	HiSeq(Illumina)
Patient166	10.1038/s41591-019-0654-5	NA	Female	M1c	6.83333	Dead	CR/PR	PD-1/PD-L1	Nivolumab	HiSeq(Illumina)
Patient167	10.1038/s41591-019-0654-5	NA	Female	M1c	9.4	Dead	PD	PD-1/PD-L1	Nivolumab	HiSeq(Illumina)
Patient173	10.1038/s41591-019-0654-5	NA	Female	M1c	1.4	Dead	PD	PD-1/PD-L1	Pembrolizumab	HiSeq(Illumina)
Patient179	10.1038/s41591-019-0654-5	NA	Female	M1b	21.7667	Alive	CR/PR	PD-1/PD-L1	Pembrolizumab	HiSeq(Illumina)
Patient181	10.1038/s41591-019-0654-5	NA	Female	M1c	15.8667	Alive	CR/PR	PD-1/PD-L1	Nivolumab	HiSeq(Illumina)
Patient182	10.1038/s41591-019-0654-5	NA	Female	M1c	24.9333	Dead	PD	PD-1/PD-L1	Nivolumab	HiSeq(Illumina)
Patient187	10.1038/s41591-019-0654-5	NA	Female	M1a	20.5667	Alive	CR/PR	CTLA-4 plus PD-1/PD-L1	Ipilimumab+Pembrolizumab	HiSeq(Illumina)
Patient189	10.1038/s41591-019-0654-5	NA	Female	M1c	23.9333	Alive	CR/PR	PD-1/PD-L1	Pembrolizumab	HiSeq(Illumina)
Patient192	10.1038/s41591-019-0654-5	NA	Female	M1c	9.66667	Alive	CR/PR	CTLA-4 plus PD-1/PD-L1	Ipilimumab+Pembrolizumab	HiSeq(Illumina)
Patient193	10.1038/s41591-019-0654-5	NA	Female	M0	21.9667	Alive	SD	PD-1/PD-L1	Pembrolizumab	HiSeq(Illumina)
Patient197	10.1038/s41591-019-0654-5	NA	Female	M1c	32	Alive	CR/PR	PD-1/PD-L1	Nivolumab	HiSeq(Illumina)
Patient20	10.1038/s41591-019-0654-5	NA	Female	M1c	8.06667	Dead	PD	CTLA-4 plus PD-1/PD-L1	Ipilimumab+Nivolumab	HiSeq(Illumina)
Patient205	10.1038/s41591-019-0654-5	NA	Female	M1c	13.0667	Dead	PD	PD-1/PD-L1	Pembrolizumab	HiSeq(Illumina)
Patient21	10.1038/s41591-019-0654-5	NA	Female	M1c	30.2	Alive	CR/PR	CTLA-4 plus PD-1/PD-L1	Ipilimumab+Pembrolizumab	HiSeq(Illumina)
Patient30	10.1038/s41591-019-0654-5	NA	Female	M1c	7.1	Dead	SD	CTLA-4 plus PD-1/PD-L1	Ipilimumab+Pembrolizumab	HiSeq(Illumina)
Patient32	10.1038/s41591-019-0654-5	NA	Female	M1c	1.76667	Dead	PD	CTLA-4 plus PD-1/PD-L1	Ipilimumab+Pembrolizumab	HiSeq(Illumina)
Patient33	10.1038/s41591-019-0654-5	NA	Female	M1c	55.9667	Alive	CR/PR	CTLA-4 plus PD-1/PD-L1	Ipilimumab+Pembrolizumab	HiSeq(Illumina)
Patient40	10.1038/s41591-019-0654-5	NA	Female	M1c	15.6	Dead	PD	PD-1/PD-L1	Nivolumab	HiSeq(Illumina)
Patient47	10.1038/s41591-019-0654-5	NA	Female	M1c	31.2333	Alive	PD	PD-1/PD-L1	Nivolumab	HiSeq(Illumina)
Patient48	10.1038/s41591-019-0654-5	NA	Female	M1c	1.76667	Dead	PD	PD-1/PD-L1	Pembrolizumab	HiSeq(Illumina)
Patient49	10.1038/s41591-019-0654-5	NA	Female	M1c	54.5	Alive	CR/PR	CTLA-4 plus PD-1/PD-L1	Ipilimumab+Nivolumab	HiSeq(Illumina)
Patient50	10.1038/s41591-019-0654-5	NA	Female	M1c	5.83333	Dead	MR	CTLA-4 plus PD-1/PD-L1	Ipilimumab+Pembrolizumab	HiSeq(Illumina)
Patient6	10.1038/s41591-019-0654-5	NA	Female	M1b	22.9	Dead	SD	CTLA-4 plus PD-1/PD-L1	Ipilimumab+Pembrolizumab	HiSeq(Illumina)
Patient61	10.1038/s41591-019-0654-5	NA	Female	M1c	32.9	Alive	SD	CTLA-4 plus PD-1/PD-L1	Ipilimumab+Nivolumab	HiSeq(Illumina)
Patient62	10.1038/s41591-019-0654-5	NA	Female	M1c	33.3667	Alive	CR/PR	CTLA-4 plus PD-1/PD-L1	Ipilimumab+Nivolumab	HiSeq(Illumina)
Patient63	10.1038/s41591-019-0654-5	NA	Female	M1c	5.93333	Dead	PD	CTLA-4 plus PD-1/PD-L1	Ipilimumab+Nivolumab	HiSeq(Illumina)
Patient67	10.1038/s41591-019-0654-5	NA	Female	M1c	4.53333	Dead	PD	PD-1/PD-L1	Nivolumab	HiSeq(Illumina)
Patient77	10.1038/s41591-019-0654-5	NA	Female	M1c	14.8	Dead	PD	PD-1/PD-L1	Pembrolizumab	HiSeq(Illumina)
Patient78	10.1038/s41591-019-0654-5	NA	Female	M1b	11.8667	Dead	PD	PD-1/PD-L1	Pembrolizumab	HiSeq(Illumina)
Patient79	10.1038/s41591-019-0654-5	NA	Female	M1c	28.3	Alive	PD	PD-1/PD-L1	Pembrolizumab	HiSeq(Illumina)
Patient84	10.1038/s41591-019-0654-5	NA	Female	M1c	5.46667	Dead	PD	CTLA-4 plus PD-1/PD-L1	Ipilimumab+Pembrolizumab	HiSeq(Illumina)
Patient87	10.1038/s41591-019-0654-5	NA	Female	M1c	42.1	Alive	CR/PR	CTLA-4 plus PD-1/PD-L1	Ipilimumab+Pembrolizumab	HiSeq(Illumina)
Patient9	10.1038/s41591-019-0654-5	NA	Female	M0	32.1	Alive	PD	PD-1/PD-L1	Nivolumab	HiSeq(Illumina)
Patient94	10.1038/s41591-019-0654-5	NA	Female	M1c	1.33333	Dead	PD	CTLA-4 plus PD-1/PD-L1	Ipilimumab+Pembrolizumab	HiSeq(Illumina)
Patient98	10.1038/s41591-019-0654-5	NA	Female	M1b	22.7667	Dead	PD	PD-1/PD-L1	Nivolumab	HiSeq(Illumina)
pt0346	10.1056/NEJMoa1406498	43	Female	M1b	35.3	Dead	CR/PR	CTLA-4	Ipilimumab/Tremelimumab	HiSeq 2000(Illumina)
pt04885	10.1056/NEJMoa1406498	49	Female	M0	25.5667	Alive	CR/PR	CTLA-4	Ipilimumab/Tremelimumab	HiSeq 2000(Illumina)
pt06670	10.1056/NEJMoa1406498	79	Female	M0	45.0333	Dead	CR/PR	CTLA-4	Ipilimumab/Tremelimumab	HiSeq 2000(Illumina)
Pt1	10.1016/j.cell.2016.02.065	66	Female	M1b	20.2333	Dead	PD	PD-1/PD-L1	Pembrolizumab/Nivolumab	HiSeq 2000(Illumina)
pt100	10.1126/science.aad0095	61	Female	M1c	3.33333	Dead	PD	CTLA-4	Ipilimumab	HiSeq 2500(Illumina)
pt108	10.1126/science.aad0095	45	Female	M1c	7.9	Dead	SD	CTLA-4	Ipilimumab	HiSeq 2500(Illumina)
pt110	10.1126/science.aad0095	43	Female	M1b	8.33333	Dead	PD	CTLA-4	Ipilimumab	HiSeq 2500(Illumina)
pt117	10.1126/science.aad0095	43	Female	M1c	10.4333	Dead	PD	CTLA-4	Ipilimumab	HiSeq 2500(Illumina)
pt120	10.1126/science.aad0095	50	Female	M1c	28.4333	Dead	SD	CTLA-4	Ipilimumab	HiSeq 2500(Illumina)
pt123	10.1126/science.aad0095	25	Female	M1c	11.0667	Dead	PD	CTLA-4	Ipilimumab	HiSeq 2500(Illumina)
Pt13	10.1016/j.cell.2016.02.065	53	Female	M1c	30.5667	Alive	CR/PR	PD-1/PD-L1	Pembrolizumab/Nivolumab	HiSeq 2000(Illumina)
pt131	10.1126/science.aad0095	29	Female	M1c	2.7	Dead	PD	CTLA-4	Ipilimumab	HiSeq 2500(Illumina)
pt132	10.1126/science.aad0095	39	Female	M1c	49.2667	Dead	SD	CTLA-4	Ipilimumab	HiSeq 2500(Illumina)
pt134	10.1126/science.aad0095	48	Female	M1c	5.43333	Dead	PD	CTLA-4	Ipilimumab	HiSeq 2500(Illumina)
pt138	10.1126/science.aad0095	35	Female	M1c	2.8	Dead	PD	CTLA-4	Ipilimumab	HiSeq 2500(Illumina)
Pt14	10.1016/j.cell.2016.02.065	27	Female	M1c	1.8	Alive	PD	PD-1/PD-L1	Pembrolizumab/Nivolumab	HiSeq 2000(Illumina)
pt141	10.1126/science.aad0095	69	Female	M1c	2.86667	Dead	SD	CTLA-4	Ipilimumab	HiSeq 2500(Illumina)
pt143	10.1126/science.aad0095	68	Female	M1b	27.0333	Dead	PD	CTLA-4	Ipilimumab	HiSeq 2500(Illumina)
pt145	10.1126/science.aad0095	55	Female	M1c	7.03333	Dead	PD	CTLA-4	Ipilimumab	HiSeq 2500(Illumina)
pt147	10.1126/science.aad0095	50	Female	M1c	3.83333	Dead	PD	CTLA-4	Ipilimumab	HiSeq 2500(Illumina)
pt1509	10.1056/NEJMoa1406498	54	Female	M1c	54.7667	Alive	CR/PR	CTLA-4	Ipilimumab/Tremelimumab	HiSeq 2000(Illumina)
pt154	10.1126/science.aad0095	57	Female	M1a	22.9333	Alive	CR/PR	CTLA-4	Ipilimumab	HiSeq 2500(Illumina)
pt155	10.1126/science.aad0095	67	Female	M1a	3	Dead	SD	CTLA-4	Ipilimumab	HiSeq 2500(Illumina)
pt156	10.1126/science.aad0095	55	Female	M0	26.6	Alive	PD	CTLA-4	Ipilimumab	HiSeq 2500(Illumina)
pt159	10.1126/science.aad0095	74	Female	M1b	32.3667	Alive	CR/PR	CTLA-4	Ipilimumab	HiSeq 2500(Illumina)
pt15C	10.1126/scitranslmed.aah3560	43	Female	NA	15.5333	Dead	PD	PD-1/PD-L1	Pembrolizumab	HiSeq 2000/2500(Illumina)
pt1650	10.1056/NEJMoa1406498	71	Female	M1c	32.8667	Dead	CR/PR	CTLA-4	Ipilimumab/Tremelimumab	HiSeq 2000(Illumina)
pt166	10.1126/science.aad0095	52	Female	M1c	1.8	Dead	PD	CTLA-4	Ipilimumab	HiSeq 2500(Illumina)
pt167	10.1126/science.aad0095	47	Female	M1c	2.33333	Dead	PD	CTLA-4	Ipilimumab	HiSeq 2500(Illumina)
pt172	10.1126/science.aad0095	75	Female	M1b	1.23333	Dead	PD	CTLA-4	Ipilimumab	HiSeq 2500(Illumina)
pt173	10.1126/science.aad0095	57	Female	M1c	9.03333	Dead	PD	CTLA-4	Ipilimumab	HiSeq 2500(Illumina)
pt175	10.1126/science.aad0095	36	Female	M1b	5.33333	Dead	PD	CTLA-4	Ipilimumab	HiSeq 2500(Illumina)
pt180	10.1126/science.aad0095	71	Female	M1c	6.43333	Dead	PD	CTLA-4	Ipilimumab	HiSeq 2500(Illumina)
pt183	10.1126/science.aad0095	59	Female	M0	21.7333	Dead	PD	CTLA-4	Ipilimumab	HiSeq 2500(Illumina)
pt189	10.1126/science.aad0095	44	Female	M0	21.7667	Alive	SD	CTLA-4	Ipilimumab	HiSeq 2500(Illumina)
pt18A	10.1126/scitranslmed.aah3560	66	Female	NA	17.9667	Dead	PD	CTLA-4 plus PD-1/PD-L1	Ipilimumab+Pembrolizumab	HiSeq 2000/2500(Illumina)
pt18C	10.1126/scitranslmed.aah3560	66	Female	NA	17.9667	Dead	PD	CTLA-4 plus PD-1/PD-L1	Ipilimumab+Pembrolizumab	HiSeq 2000/2500(Illumina)
pt197	10.1126/science.aad0095	71	Female	M1c	1.26667	Dead	PD	CTLA-4	Ipilimumab	HiSeq 2500(Illumina)
pt1D	10.1126/scitranslmed.aah3560	48	Female	NA	18.0667	Dead	PD	CTLA-4 plus PD-1/PD-L1	Ipilimumab+Pembrolizumab	HiSeq 2000/2500(Illumina)
Pt20	10.1016/j.cell.2016.02.065	63	Female	M1c	11.2333	Dead	PD	PD-1/PD-L1	Pembrolizumab/Nivolumab	HiSeq 2000(Illumina)
pt200	10.1126/science.aad0095	54	Female	M1a	20.9333	Dead	PD	CTLA-4	Ipilimumab	HiSeq 2500(Illumina)
pt201	10.1126/science.aad0095	54	Female	M1c	3.46667	Dead	PD	CTLA-4	Ipilimumab	HiSeq 2500(Illumina)
pt205	10.1126/science.aad0095	60	Female	M1c	32.9667	Alive	SD	CTLA-4	Ipilimumab	HiSeq 2500(Illumina)
pt2051	10.1056/NEJMoa1406498	61	Female	M1c	9.73333	Dead	PD	CTLA-4	Ipilimumab/Tremelimumab	HiSeq 2000(Illumina)
pt2056	10.1056/NEJMoa1406498	39	Female	M1b	47.4667	Alive	CR/PR	CTLA-4	Ipilimumab/Tremelimumab	HiSeq 2000(Illumina)
pt2057	10.1056/NEJMoa1406498	36	Female	M1c	40.1667	Alive	CR/PR	CTLA-4	Ipilimumab/Tremelimumab	HiSeq 2000(Illumina)
pt208	10.1126/science.aad0095	57	Female	M1c	4.66667	Dead	PD	CTLA-4	Ipilimumab	HiSeq 2500(Illumina)
pt22A	10.1126/scitranslmed.aah3560	50	Female	NA	20.7667	Alive	CR/PR	CTLA-4	Ipilimumab	HiSeq 2000/2500(Illumina)
pt22B	10.1126/scitranslmed.aah3560	50	Female	NA	20.7667	Alive	CR/PR	CTLA-4	Ipilimumab	HiSeq 2000/2500(Illumina)
pt25A	10.1126/scitranslmed.aah3560	46	Female	NA	29.8	Dead	PD	CTLA-4 plus PD-1/PD-L1	Ipilimumab+Pembrolizumab	HiSeq 2000/2500(Illumina)
pt25C	10.1126/scitranslmed.aah3560	46	Female	NA	29.8	Dead	PD	CTLA-4 plus PD-1/PD-L1	Ipilimumab+Pembrolizumab	HiSeq 2000/2500(Illumina)
pt26C	10.1126/scitranslmed.aah3560	60	Female	NA	41.8667	Dead	PD	CTLA-4 plus PD-1/PD-L1	Ipilimumab+Pembrolizumab	HiSeq 2000/2500(Illumina)
pt26E	10.1126/scitranslmed.aah3560	60	Female	NA	41.8667	Dead	PD	CTLA-4 plus PD-1/PD-L1	Ipilimumab+Pembrolizumab	HiSeq 2000/2500(Illumina)
Pt30	10.1016/j.cell.2016.02.065	80	Female	M1c	3.33333	Dead	PD	PD-1/PD-L1	Pembrolizumab/Nivolumab	HiSeq 2000(Illumina)
pt3156	10.1056/NEJMoa1406498	68	Female	M1b	13.4	Dead	PD	CTLA-4	Ipilimumab/Tremelimumab	HiSeq 2000(Illumina)
pt31A	10.1126/scitranslmed.aah3560	71	Female	NA	59.6667	Alive	PD	CTLA-4	Ipilimumab	HiSeq 2000/2500(Illumina)
pt32A	10.1126/scitranslmed.aah3560	84	Female	NA	30.9	Alive	PD	CTLA-4 plus PD-1/PD-L1	Ipilimumab+Pembrolizumab	HiSeq 2000/2500(Illumina)
Pt33	10.1016/j.cell.2016.02.065	80	Female	M1a	72.5667	Alive	CR/PR	PD-1/PD-L1	Pembrolizumab/Nivolumab	HiSeq 2000(Illumina)
pt33A	10.1126/scitranslmed.aah3560	61	Female	NA	11.9667	Dead	PD	CTLA-4 plus PD-1/PD-L1	Ipilimumab+Pembrolizumab	HiSeq 2000/2500(Illumina)
pt33C	10.1126/scitranslmed.aah3560	61	Female	NA	11.9667	Dead	PD	CTLA-4 plus PD-1/PD-L1	Ipilimumab+Pembrolizumab	HiSeq 2000/2500(Illumina)
Pt35	10.1016/j.cell.2016.02.065	65	Female	M1c	14.2333	Alive	CR/PR	PD-1/PD-L1	Pembrolizumab/Nivolumab	HiSeq 2000(Illumina)
Pt36	10.1016/j.cell.2016.02.065	61	Female	M1a	27.9	Dead	PD	PD-1/PD-L1	Pembrolizumab/Nivolumab	HiSeq 2000(Illumina)
Pt37	10.1016/j.cell.2016.02.065	70	Female	M1c	12.1333	Alive	CR/PR	PD-1/PD-L1	Pembrolizumab/Nivolumab	HiSeq 2000(Illumina)
Pt38	10.1016/j.cell.2016.02.065	57	Female	M1c	14.9333	Alive	CR/PR	PD-1/PD-L1	Pembrolizumab/Nivolumab	HiSeq 2000(Illumina)
pt3C	10.1126/scitranslmed.aah3560	60	Female	NA	14.9	Dead	PD	CTLA-4 plus PD-1/PD-L1	Ipilimumab+Pembrolizumab	HiSeq 2000/2500(Illumina)
pt3D1	10.1126/scitranslmed.aah3560	60	Female	NA	14.9	Dead	PD	CTLA-4 plus PD-1/PD-L1	Ipilimumab+Pembrolizumab	HiSeq 2000/2500(Illumina)
pt3D2	10.1126/scitranslmed.aah3560	60	Female	NA	14.9	Dead	PD	CTLA-4 plus PD-1/PD-L1	Ipilimumab+Pembrolizumab	HiSeq 2000/2500(Illumina)
pt4091	10.1056/NEJMoa1406498	65	Female	M1a	73	Alive	CR/PR	CTLA-4	Ipilimumab/Tremelimumab	HiSeq 2000(Illumina)
pt4092	10.1056/NEJMoa1406498	57	Female	M1a	74.2333	Alive	CR/PR	CTLA-4	Ipilimumab/Tremelimumab	HiSeq 2000(Illumina)
pt42E	10.1126/scitranslmed.aah3560	48	Female	NA	70.3667	Alive	PD	CTLA-4 plus PD-1/PD-L1	Ipilimumab+Pembrolizumab	HiSeq 2000/2500(Illumina)
pt4810	10.1056/NEJMoa1406498	48	Female	M1c	4.86667	Dead	PD	CTLA-4	Ipilimumab/Tremelimumab	HiSeq 2000(Illumina)
pt4941	10.1056/NEJMoa1406498	40	Female	M1c	87.6	Alive	CR/PR	CTLA-4	Ipilimumab/Tremelimumab	HiSeq 2000(Illumina)
pt4949	10.1056/NEJMoa1406498	79	Female	M1c	8.53333	Dead	PD	CTLA-4	Ipilimumab/Tremelimumab	HiSeq 2000(Illumina)
pt5118	10.1056/NEJMoa1406498	55	Female	M1c	32.8667	Dead	PD	CTLA-4	Ipilimumab/Tremelimumab	HiSeq 2000(Illumina)
pt5784	10.1056/NEJMoa1406498	58	Female	M1c	6.1	Dead	PD	CTLA-4	Ipilimumab/Tremelimumab	HiSeq 2000(Illumina)
pt5A	10.1126/scitranslmed.aah3560	47	Female	NA	35.0667	Dead	CR/PR	CTLA-4	Ipilimumab	HiSeq 2000/2500(Illumina)
pt6126	10.1056/NEJMoa1406498	66	Female	M1b	23.1333	Alive	CR/PR	CTLA-4	Ipilimumab/Tremelimumab	HiSeq 2000(Illumina)
pt6494	10.1056/NEJMoa1406498	63	Female	M1c	8.53333	Dead	PD	CTLA-4	Ipilimumab/Tremelimumab	HiSeq 2000(Illumina)
pt6689	10.1056/NEJMoa1406498	46	Female	M1c	14.6	Dead	PD	CTLA-4	Ipilimumab/Tremelimumab	HiSeq 2000(Illumina)
Pt7	10.1016/j.cell.2016.02.065	55	Female	M1c	22.0667	Dead	PD	PD-1/PD-L1	Pembrolizumab/Nivolumab	HiSeq 2000(Illumina)
pt7357	10.1056/NEJMoa1406498	50	Female	M1c	24.3333	Dead	PD	CTLA-4	Ipilimumab/Tremelimumab	HiSeq 2000(Illumina)
pt8815	10.1056/NEJMoa1406498	67	Female	M1b	14.6	Dead	PD	CTLA-4	Ipilimumab/Tremelimumab	HiSeq 2000(Illumina)
pt9298	10.1056/NEJMoa1406498	82	Female	M1c	51.1	Alive	CR/PR	CTLA-4	Ipilimumab/Tremelimumab	HiSeq 2000(Illumina)
pt9449	10.1056/NEJMoa1406498	64	Female	M1c	7.3	Dead	PD	CTLA-4	Ipilimumab/Tremelimumab	HiSeq 2000(Illumina)
pt9705	10.1056/NEJMoa1406498	63	Female	M1c	14.6	Dead	PD	CTLA-4	Ipilimumab/Tremelimumab	HiSeq 2000(Illumina)
pt9765	10.1056/NEJMoa1406498	38	Female	M1b	25.5667	Dead	PD	CTLA-4	Ipilimumab/Tremelimumab	HiSeq 2000(Illumina)
pt99	10.1126/science.aad0095	42	Female	M1c	54.4	Alive	SD	CTLA-4	Ipilimumab	HiSeq 2500(Illumina)
CR04885_T_N	10.1038/s41588-018-0200-2	NA	Female	NA	25.55	Dead	CR/PR	CTLA-4	NA	HiSeq 2500(Illumina)
CR06670_T_N	10.1038/s41588-018-0200-2	NA	Female	NA	45.0167	Alive	CR/PR	CTLA-4	NA	HiSeq 2500(Illumina)
CR1509_T_N	10.1038/s41588-018-0200-2	NA	Female	NA	54.75	Dead	CR/PR	CTLA-4	NA	HiSeq 2500(Illumina)
CR6126_T_N	10.1038/s41588-018-0200-2	NA	Female	NA	23.5667	Dead	CR/PR	CTLA-4	NA	HiSeq 2500(Illumina)
DFCI_MM_1-TP-NB-SM-BZRJ8-SM-BZRJC	10.1038/s41588-018-0200-2	NA	Female	NA	20	Dead	CR/PR	PD-1/PD-L1	NA	HiSeq 2500(Illumina)
DFCI_MM_2-TP-NB-SM-BZRJA-SM-BZRJD	10.1038/s41588-018-0200-2	NA	Female	NA	12.1667	Dead	CR/PR	PD-1/PD-L1	NA	HiSeq 2500(Illumina)
LSD2057_T_N	10.1038/s41588-018-0200-2	NA	Female	NA	40.15	Dead	SD	CTLA-4	NA	HiSeq 2500(Illumina)
MEL-582186-TP-NB-SM-CN21Q-SM-CJP7T	10.1038/s41588-018-0200-2	NA	Female	NA	13.8333	Dead	CR/PR	CTLA-4 plus PD-1/PD-L1	NA	HiSeq 2500(Illumina)
MEL-650366-TP-NB-SM-CN221-SM-CJP7U	10.1038/s41588-018-0200-2	NA	Female	NA	26.4667	Dead	PD	CTLA-4 plus PD-1/PD-L1	NA	HiSeq 2500(Illumina)
MEL-682321-TP-NB-SM-CN21G-SM-CJP7S	10.1038/s41588-018-0200-2	NA	Female	NA	14.9	Dead	CR/PR	CTLA-4 plus PD-1/PD-L1	NA	HiSeq 2500(Illumina)
MEL-IPI_Pat02-TP-NB-SM-4DJZX-SM-4NFU4	10.1038/s41588-018-0200-2	42	Female	NA	54.4	Dead	SD	CTLA-4	NA	HiSeq 2500(Illumina)
MEL-IPI_Pat03-TP-NB-SM-4DJZY-SM-4NFU5	10.1038/s41588-018-0200-2	61	Female	NA	3.33333	Alive	PD	CTLA-4	NA	HiSeq 2500(Illumina)
MEL-IPI_Pat104-TP-NT-SM-4CU6R-SM-53U4Q	10.1038/s41588-018-0200-2	45	Female	NA	7.9	Alive	SD	CTLA-4	NA	HiSeq 2500(Illumina)
MEL-IPI_Pat106-TP-NT-SM-4CU6T-SM-4MGPK	10.1038/s41588-018-0200-2	43	Female	NA	8.33333	Alive	PD	CTLA-4	NA	HiSeq 2500(Illumina)
MEL-IPI_Pat118-TP-NT-SM-5X2QV-SM-5X2RD	10.1038/s41588-018-0200-2	43	Female	NA	10.4333	Alive	PD	CTLA-4	NA	HiSeq 2500(Illumina)
MEL-IPI_Pat123-TP-NB-SM-5X2R1-SM-5VWHL	10.1038/s41588-018-0200-2	49	Female	NA	28.4333	Alive	SD	CTLA-4	NA	HiSeq 2500(Illumina)
MEL-IPI_Pat127-TP-NB-SM-5X2R5-SM-5VWHP	10.1038/s41588-018-0200-2	24	Female	NA	11.0667	Alive	PD	CTLA-4	NA	HiSeq 2500(Illumina)
MEL-IPI_Pat135-TP-NB-SM-7A152-SM-5VWHU	10.1038/s41588-018-0200-2	29	Female	NA	2.7	Alive	PD	CTLA-4	NA	HiSeq 2500(Illumina)
MEL-IPI_Pat138-TP-NB-SM-7A155-SM-5VWHX	10.1038/s41588-018-0200-2	39	Female	NA	49.2667	Alive	SD	CTLA-4	NA	HiSeq 2500(Illumina)
MEL-IPI_Pat14-TP-NB-SM-53U3C-SM-4NFUG	10.1038/s41588-018-0200-2	47	Female	NA	5.43333	Alive	PD	CTLA-4	NA	HiSeq 2500(Illumina)
MEL-IPI_Pat148-TP-NB-SM-5VWJQ-SM-5VWI8	10.1038/s41588-018-0200-2	36	Female	NA	2.8	Alive	PD	CTLA-4	NA	HiSeq 2500(Illumina)
MEL-IPI_Pat157-TP-NB-SM-7A15B-SM-5VWIH	10.1038/s41588-018-0200-2	69	Female	NA	2.86667	Alive	NA	CTLA-4	NA	HiSeq 2500(Illumina)
MEL-IPI_Pat16-TP-NT-SM-53U3E-SM-53U5B	10.1038/s41588-018-0200-2	68	Female	NA	27.0333	Alive	PD	CTLA-4	NA	HiSeq 2500(Illumina)
MEL-IPI_Pat162-TP-NB-SM-7A15D-SM-5VWIM	10.1038/s41588-018-0200-2	55	Female	NA	7.03333	Alive	PD	CTLA-4	NA	HiSeq 2500(Illumina)
MEL-IPI_Pat174-TP-NB-SM-5VOB4-SM-5VWIY	10.1038/s41588-018-0200-2	57	Female	NA	22.9333	Dead	CR/PR	CTLA-4	NA	HiSeq 2500(Illumina)
MEL-IPI_Pat175-TP-NB-SM-7A15L-SM-5VWIZ	10.1038/s41588-018-0200-2	66	Female	NA	3	Alive	NA	CTLA-4	NA	HiSeq 2500(Illumina)
MEL-IPI_Pat18-TP-NT-SM-4DK1E-SM-53U5D	10.1038/s41588-018-0200-2	55	Female	NA	37.8	Dead	PD	CTLA-4	NA	HiSeq 2500(Illumina)
MEL-IPI_Pat24-TP-NT-SM-4DK1K-SM-53U5J	10.1038/s41588-018-0200-2	74	Female	NA	32.3667	Dead	CR/PR	CTLA-4	NA	HiSeq 2500(Illumina)
MEL-IPI_Pat43-TP-NB-SM-4DK24-SM-4NFVA	10.1038/s41588-018-0200-2	75	Female	NA	1.23333	Alive	PD	CTLA-4	NA	HiSeq 2500(Illumina)
MEL-IPI_Pat46-TP-NT-SM-53U48-SM-53U5S	10.1038/s41588-018-0200-2	37	Female	NA	5.33333	Alive	PD	CTLA-4	NA	HiSeq 2500(Illumina)
MEL-IPI_Pat55-TP-NB-SM-4DK2G-SM-4NFVM	10.1038/s41588-018-0200-2	71	Female	NA	6.43333	Alive	PD	CTLA-4	NA	HiSeq 2500(Illumina)
MEL-IPI_Pat58-TP-NB-SM-4DK2J-SM-4NFVP	10.1038/s41588-018-0200-2	59	Female	NA	21.7333	Alive	PD	CTLA-4	NA	HiSeq 2500(Illumina)
MEL-IPI_Pat61-TP-NB-SM-4DK2M-SM-4NFVS	10.1038/s41588-018-0200-2	78	Female	NA	4.03333	Alive	PD	CTLA-4	NA	HiSeq 2500(Illumina)
MEL-IPI_Pat66-TP-NB-SM-4DK2R-SM-4NFVX	10.1038/s41588-018-0200-2	44	Female	NA	21.7667	Dead	SD	CTLA-4	NA	HiSeq 2500(Illumina)
MEL-IPI_Pat81-TP-NB-SM-4DK37-SM-4NFWD	10.1038/s41588-018-0200-2	54	Female	NA	20.9333	Alive	PD	CTLA-4	NA	HiSeq 2500(Illumina)
MEL-IPI_Pat82-TP-NT-SM-4DK38-SM-53U55	10.1038/s41588-018-0200-2	54	Female	NA	3.46667	Alive	PD	CTLA-4	NA	HiSeq 2500(Illumina)
MEL-IPI_Pat98-TP-NT-SM-4CU6L-SM-53U4K	10.1038/s41588-018-0200-2	57	Female	NA	4.66667	Alive	PD	CTLA-4	NA	HiSeq 2500(Illumina)
MEL-IPI_Pat99-TP-NT-SM-4CU6M-SM-53U4L	10.1038/s41588-018-0200-2	36	Female	NA	11.7333	Alive	PD	CTLA-4	NA	HiSeq 2500(Illumina)
NR4810_T_N	10.1038/s41588-018-0200-2	NA	Female	NA	4.86667	Dead	PD	CTLA-4	NA	HiSeq 2500(Illumina)
NR4949_T_N	10.1038/s41588-018-0200-2	NA	Female	NA	8.51667	Dead	PD	CTLA-4	NA	HiSeq 2500(Illumina)
NR8815_T_N	10.1038/s41588-018-0200-2	NA	Female	NA	14.6	Dead	PD	CTLA-4	NA	HiSeq 2500(Illumina)
NR9449_T_N	10.1038/s41588-018-0200-2	NA	Female	NA	7.3	Dead	PD	CTLA-4	NA	HiSeq 2500(Illumina)
NR9705_T_N	10.1038/s41588-018-0200-2	NA	Female	NA	14.6	Dead	PD	CTLA-4	NA	HiSeq 2500(Illumina)
NR9765_T_N	10.1038/s41588-018-0200-2	NA	Female	NA	25.55	Dead	PD	CTLA-4	NA	HiSeq 2500(Illumina)
PR4091_T_N	10.1038/s41588-018-0200-2	NA	Female	NA	73.2667	Dead	CR/PR	CTLA-4	NA	HiSeq 2500(Illumina)
PR4092_T_N	10.1038/s41588-018-0200-2	NA	Female	NA	74.2167	Dead	CR/PR	CTLA-4	NA	HiSeq 2500(Illumina)
SD0346_T_N	10.1038/s41588-018-0200-2	NA	Female	NA	35.2833	Alive	SD	CTLA-4	NA	HiSeq 2500(Illumina)
SD2051_T_N	10.1038/s41588-018-0200-2	NA	Female	NA	9.73333	Alive	SD	CTLA-4	NA	HiSeq 2500(Illumina)
SD2056_T_N	10.1038/s41588-018-0200-2	NA	Female	NA	48.5333	Dead	SD	CTLA-4	NA	HiSeq 2500(Illumina)
SD5118_T_N	10.1038/s41588-018-0200-2	NA	Female	NA	32.85	Alive	SD	CTLA-4	NA	HiSeq 2500(Illumina)
SD6494_T_N	10.1038/s41588-018-0200-2	NA	Female	NA	8.51667	Alive	SD	CTLA-4	NA	HiSeq 2500(Illumina)
SD7357_T_N	10.1038/s41588-018-0200-2	NA	Female	NA	24.3333	Alive	SD	CTLA-4	NA	HiSeq 2500(Illumina)
Patient102	10.1038/s41591-019-0654-5	NA	Male	M1c	26.1667	Alive	MR	PD-1/PD-L1	Pembrolizumab	HiSeq(Illumina)
Patient107	10.1038/s41591-019-0654-5	NA	Male	M1c	1.56667	Dead	CR/PR	PD-1/PD-L1	Pembrolizumab	HiSeq(Illumina)
Patient108	10.1038/s41591-019-0654-5	NA	Male	M1c	5.5	Dead	PD	PD-1/PD-L1	Pembrolizumab	HiSeq(Illumina)
Patient125	10.1038/s41591-019-0654-5	NA	Male	M1c	32.6	Alive	CR/PR	PD-1/PD-L1	Nivolumab	HiSeq(Illumina)
Patient126	10.1038/s41591-019-0654-5	NA	Male	M1c	33.0667	Alive	CR/PR	PD-1/PD-L1	Nivolumab	HiSeq(Illumina)
Patient127	10.1038/s41591-019-0654-5	NA	Male	M1c	28.8667	Alive	CR/PR	PD-1/PD-L1	Nivolumab	HiSeq(Illumina)
Patient13	10.1038/s41591-019-0654-5	NA	Male	M1c	1.93333	Dead	PD	CTLA-4 plus PD-1/PD-L1	Ipilimumab+Pembrolizumab	HiSeq(Illumina)
Patient131	10.1038/s41591-019-0654-5	NA	Male	M1b	27.7667	Alive	CR/PR	PD-1/PD-L1	Pembrolizumab	HiSeq(Illumina)
Patient132	10.1038/s41591-019-0654-5	NA	Male	M1b	24.6333	Alive	CR/PR	PD-1/PD-L1	Pembrolizumab	HiSeq(Illumina)
Patient133	10.1038/s41591-019-0654-5	NA	Male	M1c	12.3333	Dead	PD	PD-1/PD-L1	Pembrolizumab	HiSeq(Illumina)
Patient134	10.1038/s41591-019-0654-5	NA	Male	M1b	19.6667	Dead	PD	PD-1/PD-L1	Pembrolizumab	HiSeq(Illumina)
Patient135	10.1038/s41591-019-0654-5	NA	Male	M1c	20.9333	Alive	CR/PR	PD-1/PD-L1	Pembrolizumab	HiSeq(Illumina)
Patient136	10.1038/s41591-019-0654-5	NA	Male	M1b	23.2667	Alive	PD	PD-1/PD-L1	Pembrolizumab	HiSeq(Illumina)
Patient140	10.1038/s41591-019-0654-5	NA	Male	M1b	11.7	Dead	PD	PD-1/PD-L1	Pembrolizumab	HiSeq(Illumina)
Patient143	10.1038/s41591-019-0654-5	NA	Male	M0	21	Alive	PD	PD-1/PD-L1	Pembrolizumab	HiSeq(Illumina)
Patient144	10.1038/s41591-019-0654-5	NA	Male	M1c	22.0667	Alive	CR/PR	PD-1/PD-L1	Pembrolizumab	HiSeq(Illumina)
Patient145	10.1038/s41591-019-0654-5	NA	Male	M1c	27.7667	Alive	CR/PR	PD-1/PD-L1	Pembrolizumab	HiSeq(Illumina)
Patient147	10.1038/s41591-019-0654-5	NA	Male	M1c	32	Alive	CR/PR	PD-1/PD-L1	Nivolumab	HiSeq(Illumina)
Patient149	10.1038/s41591-019-0654-5	NA	Male	M1c	16.5667	Dead	SD	PD-1/PD-L1	Pembrolizumab	HiSeq(Illumina)
Patient150	10.1038/s41591-019-0654-5	NA	Male	M1c	22.8333	Alive	CR/PR	PD-1/PD-L1	Pembrolizumab	HiSeq(Illumina)
Patient155	10.1038/s41591-019-0654-5	NA	Male	M0	15.8333	Alive	PD	PD-1/PD-L1	Pembrolizumab	HiSeq(Illumina)
Patient156	10.1038/s41591-019-0654-5	NA	Male	M1c	2.9	Dead	PD	PD-1/PD-L1	Pembrolizumab	HiSeq(Illumina)
Patient157	10.1038/s41591-019-0654-5	NA	Male	M1c	4.76667	Alive	PD	PD-1/PD-L1	Pembrolizumab	HiSeq(Illumina)
Patient158	10.1038/s41591-019-0654-5	NA	Male	M1c	6.46667	Alive	CR/PR	PD-1/PD-L1	Pembrolizumab	HiSeq(Illumina)
Patient162	10.1038/s41591-019-0654-5	NA	Male	M1c	6.7	Dead	PD	CTLA-4 plus PD-1/PD-L1	Ipilimumab+Nivolumab	HiSeq(Illumina)
Patient163	10.1038/s41591-019-0654-5	NA	Male	M1c	5.76667	Dead	PD	CTLA-4 plus PD-1/PD-L1	Ipilimumab+Nivolumab	HiSeq(Illumina)
Patient165	10.1038/s41591-019-0654-5	NA	Male	M1c	2.5	Alive	PD	PD-1/PD-L1	Pembrolizumab	HiSeq(Illumina)
Patient168	10.1038/s41591-019-0654-5	NA	Male	M1c	20.7667	Alive	CR/PR	PD-1/PD-L1	Nivolumab	HiSeq(Illumina)
Patient169	10.1038/s41591-019-0654-5	NA	Male	M1c	18.1	Alive	CR/PR	PD-1/PD-L1	Pembrolizumab	HiSeq(Illumina)
Patient17	10.1038/s41591-019-0654-5	NA	Male	M1c	22.8667	Dead	SD	CTLA-4 plus PD-1/PD-L1	Ipilimumab+Nivolumab	HiSeq(Illumina)
Patient170	10.1038/s41591-019-0654-5	NA	Male	M0	11.5667	Alive	SD	PD-1/PD-L1	Pembrolizumab	HiSeq(Illumina)
Patient172	10.1038/s41591-019-0654-5	NA	Male	M0	9.06667	Alive	SD	PD-1/PD-L1	Pembrolizumab	HiSeq(Illumina)
Patient18	10.1038/s41591-019-0654-5	NA	Male	M0	4.33333	Dead	PD	PD-1/PD-L1	Nivolumab	HiSeq(Illumina)
Patient180	10.1038/s41591-019-0654-5	NA	Male	M1c	12.6667	Dead	SD	PD-1/PD-L1	Pembrolizumab	HiSeq(Illumina)
Patient183	10.1038/s41591-019-0654-5	NA	Male	M1c	19.0667	Dead	PD	PD-1/PD-L1	Pembrolizumab	HiSeq(Illumina)
Patient184	10.1038/s41591-019-0654-5	NA	Male	M1c	17.1	Alive	CR/PR	PD-1/PD-L1	Nivolumab	HiSeq(Illumina)
Patient185	10.1038/s41591-019-0654-5	NA	Male	M1c	6.76667	Alive	SD	PD-1/PD-L1	Nivolumab	HiSeq(Illumina)
Patient188	10.1038/s41591-019-0654-5	NA	Male	M1a	2.46667	Dead	PD	PD-1/PD-L1	Pembrolizumab	HiSeq(Illumina)
Patient191	10.1038/s41591-019-0654-5	NA	Male	M1b	21.9333	Alive	CR/PR	PD-1/PD-L1	Nivolumab	HiSeq(Illumina)
Patient195	10.1038/s41591-019-0654-5	NA	Male	M1c	29.8333	Alive	CR/PR	CTLA-4 plus PD-1/PD-L1	Ipilimumab+Nivolumab	HiSeq(Illumina)
Patient196	10.1038/s41591-019-0654-5	NA	Male	M1c	2.7	Dead	PD	PD-1/PD-L1	Nivolumab	HiSeq(Illumina)
Patient200	10.1038/s41591-019-0654-5	NA	Male	M1c	17.0667	Dead	PD	PD-1/PD-L1	Pembrolizumab	HiSeq(Illumina)
Patient201	10.1038/s41591-019-0654-5	NA	Male	M0	5.56667	Dead	PD	PD-1/PD-L1	Pembrolizumab	HiSeq(Illumina)
Patient203	10.1038/s41591-019-0654-5	NA	Male	M1b	20.8667	Dead	PD	CTLA-4 plus PD-1/PD-L1	Ipilimumab+Pembrolizumab	HiSeq(Illumina)
Patient204	10.1038/s41591-019-0654-5	NA	Male	M1a	27.3	Alive	CR/PR	PD-1/PD-L1	Pembrolizumab	HiSeq(Illumina)
Patient206	10.1038/s41591-019-0654-5	NA	Male	M1c	3	Dead	PD	CTLA-4 plus PD-1/PD-L1	Ipilimumab+Pembrolizumab	HiSeq(Illumina)
Patient22	10.1038/s41591-019-0654-5	NA	Male	M1c	8.43333	Dead	PD	CTLA-4 plus PD-1/PD-L1	Ipilimumab+Nivolumab	HiSeq(Illumina)
Patient23	10.1038/s41591-019-0654-5	NA	Male	M0	32.5	Alive	PD	PD-1/PD-L1	Nivolumab	HiSeq(Illumina)
Patient24	10.1038/s41591-019-0654-5	NA	Male	M1c	4.56667	Dead	PD	CTLA-4 plus PD-1/PD-L1	Ipilimumab+Nivolumab	HiSeq(Illumina)
Patient25	10.1038/s41591-019-0654-5	NA	Male	M1c	36.5333	Alive	CR/PR	CTLA-4 plus PD-1/PD-L1	Ipilimumab+Pembrolizumab	HiSeq(Illumina)
Patient27	10.1038/s41591-019-0654-5	NA	Male	M1a	14.3667	Dead	PD	CTLA-4 plus PD-1/PD-L1	Ipilimumab+Pembrolizumab	HiSeq(Illumina)
Patient31	10.1038/s41591-019-0654-5	NA	Male	M1c	14.2	Dead	PD	CTLA-4 plus PD-1/PD-L1	Ipilimumab+Pembrolizumab	HiSeq(Illumina)
Patient34	10.1038/s41591-019-0654-5	NA	Male	M1b	56.3667	Alive	CR/PR	CTLA-4 plus PD-1/PD-L1	Ipilimumab+Pembrolizumab	HiSeq(Illumina)
Patient35	10.1038/s41591-019-0654-5	NA	Male	M1c	32.2667	Dead	SD	CTLA-4 plus PD-1/PD-L1	Ipilimumab+Nivolumab	HiSeq(Illumina)
Patient36	10.1038/s41591-019-0654-5	NA	Male	M1c	15.0333	Dead	PD	PD-1/PD-L1	Nivolumab	HiSeq(Illumina)
Patient37	10.1038/s41591-019-0654-5	NA	Male	M1c	9.16667	Dead	PD	PD-1/PD-L1	Nivolumab	HiSeq(Illumina)
Patient38	10.1038/s41591-019-0654-5	NA	Male	M1c	11.4333	Dead	PD	CTLA-4 plus PD-1/PD-L1	Ipilimumab+Nivolumab	HiSeq(Illumina)
Patient39	10.1038/s41591-019-0654-5	NA	Male	M1a	31.2333	Alive	SD	PD-1/PD-L1	Nivolumab	HiSeq(Illumina)
Patient4	10.1038/s41591-019-0654-5	NA	Male	M1c	20	Dead	CR/PR	CTLA-4 plus PD-1/PD-L1	Ipilimumab+Pembrolizumab	HiSeq(Illumina)
Patient41	10.1038/s41591-019-0654-5	NA	Male	M1b	56.1667	Alive	CR/PR	CTLA-4 plus PD-1/PD-L1	Ipilimumab+Nivolumab	HiSeq(Illumina)
Patient42	10.1038/s41591-019-0654-5	NA	Male	M1c	34.2333	Alive	CR/PR	CTLA-4 plus PD-1/PD-L1	Ipilimumab+Nivolumab	HiSeq(Illumina)
Patient43	10.1038/s41591-019-0654-5	NA	Male	M1c	30.8333	Alive	CR/PR	PD-1/PD-L1	Nivolumab	HiSeq(Illumina)
Patient44	10.1038/s41591-019-0654-5	NA	Male	M1c	30.7333	Alive	CR/PR	CTLA-4 plus PD-1/PD-L1	Ipilimumab+Nivolumab	HiSeq(Illumina)
Patient45	10.1038/s41591-019-0654-5	NA	Male	M1c	55.5333	Alive	CR/PR	CTLA-4 plus PD-1/PD-L1	Ipilimumab+Nivolumab	HiSeq(Illumina)
Patient46	10.1038/s41591-019-0654-5	NA	Male	M1c	29.8667	Alive	SD	PD-1/PD-L1	Pembrolizumab	HiSeq(Illumina)
Patient51	10.1038/s41591-019-0654-5	NA	Male	M1b	51.5667	Alive	CR/PR	PD-1/PD-L1	Nivolumab	HiSeq(Illumina)
Patient54	10.1038/s41591-019-0654-5	NA	Male	M1c	33.9	Dead	MR	CTLA-4 plus PD-1/PD-L1	Ipilimumab+Pembrolizumab	HiSeq(Illumina)
Patient55	10.1038/s41591-019-0654-5	NA	Male	M1c	50.1	Alive	CR/PR	PD-1/PD-L1	Nivolumab	HiSeq(Illumina)
Patient56	10.1038/s41591-019-0654-5	NA	Male	M1c	4.06667	Dead	PD	CTLA-4 plus PD-1/PD-L1	Ipilimumab+Nivolumab	HiSeq(Illumina)
Patient58	10.1038/s41591-019-0654-5	NA	Male	M1c	10.1	Dead	PD	CTLA-4 plus PD-1/PD-L1	Ipilimumab+Nivolumab	HiSeq(Illumina)
Patient59	10.1038/s41591-019-0654-5	NA	Male	M1c	6.36667	Dead	PD	CTLA-4 plus PD-1/PD-L1	Ipilimumab+Nivolumab	HiSeq(Illumina)
Patient60	10.1038/s41591-019-0654-5	NA	Male	M1b	22.0667	Dead	SD	CTLA-4 plus PD-1/PD-L1	Ipilimumab+Nivolumab	HiSeq(Illumina)
Patient7	10.1038/s41591-019-0654-5	NA	Male	M1c	8.96667	Dead	SD	CTLA-4 plus PD-1/PD-L1	Ipilimumab+Pembrolizumab	HiSeq(Illumina)
Patient72	10.1038/s41591-019-0654-5	NA	Male	M1a	13.1667	Alive	PD	CTLA-4 plus PD-1/PD-L1	Ipilimumab+Nivolumab	HiSeq(Illumina)
Patient73	10.1038/s41591-019-0654-5	NA	Male	M1c	28.2	Dead	PD	CTLA-4 plus PD-1/PD-L1	Ipilimumab+Nivolumab	HiSeq(Illumina)
Patient75	10.1038/s41591-019-0654-5	NA	Male	M1c	29.7	Alive	CR/PR	PD-1/PD-L1	Nivolumab	HiSeq(Illumina)
Patient8	10.1038/s41591-019-0654-5	NA	Male	M1b	33.5	Dead	SD	PD-1/PD-L1	Pembrolizumab	HiSeq(Illumina)
Patient80	10.1038/s41591-019-0654-5	NA	Male	M1b	16.7333	Dead	PD	CTLA-4 plus PD-1/PD-L1	Ipilimumab+Pembrolizumab	HiSeq(Illumina)
Patient82	10.1038/s41591-019-0654-5	NA	Male	M1c	4.36667	Dead	PD	CTLA-4 plus PD-1/PD-L1	Ipilimumab+Pembrolizumab	HiSeq(Illumina)
Patient83	10.1038/s41591-019-0654-5	NA	Male	M1c	2.36667	Dead	PD	CTLA-4 plus PD-1/PD-L1	Ipilimumab+Nivolumab	HiSeq(Illumina)
Patient86	10.1038/s41591-019-0654-5	NA	Male	M1c	44.2333	Alive	SD	CTLA-4 plus PD-1/PD-L1	Ipilimumab+Pembrolizumab	HiSeq(Illumina)
Patient88	10.1038/s41591-019-0654-5	NA	Male	M1c	2.46667	Dead	PD	CTLA-4 plus PD-1/PD-L1	Ipilimumab+Pembrolizumab	HiSeq(Illumina)
Patient96	10.1038/s41591-019-0654-5	NA	Male	M1c	30.4333	Alive	CR/PR	PD-1/PD-L1	Nivolumab	HiSeq(Illumina)
Patient99	10.1038/s41591-019-0654-5	NA	Male	M1c	30.7	Alive	CR/PR	PD-1/PD-L1	Nivolumab	HiSeq(Illumina)
pt0095	10.1056/NEJMoa1406498	74	Male	M1b	69.3667	Alive	CR/PR	CTLA-4	Ipilimumab/Tremelimumab	HiSeq 2000(Illumina)
pt0167	10.1056/NEJMoa1406498	33	Male	M1c	32.8667	Alive	CR/PR	CTLA-4	Ipilimumab/Tremelimumab	HiSeq 2000(Illumina)
pt0244	10.1056/NEJMoa1406498	49	Male	M1c	25.5667	Alive	CR/PR	CTLA-4	Ipilimumab/Tremelimumab	HiSeq 2000(Illumina)
pt03803	10.1056/NEJMoa1406498	90	Male	M0	96.1333	Dead	CR/PR	CTLA-4	Ipilimumab/Tremelimumab	HiSeq 2000(Illumina)
Pt10	10.1016/j.cell.2016.02.065	60	Male	M1a	12.9	Alive	PD	PD-1/PD-L1	Pembrolizumab/Nivolumab	HiSeq 2000(Illumina)
pt101	10.1126/science.aad0095	71	Male	M1b	32.9	Alive	CR/PR	CTLA-4	Ipilimumab	HiSeq 2500(Illumina)
pt102	10.1126/science.aad0095	33	Male	M1c	5.36667	Dead	PD	CTLA-4	Ipilimumab	HiSeq 2500(Illumina)
pt103	10.1126/science.aad0095	36	Male	M0	35	Alive	SD	CTLA-4	Ipilimumab	HiSeq 2500(Illumina)
pt104	10.1126/science.aad0095	73	Male	M1c	4.66667	Dead	PD	CTLA-4	Ipilimumab	HiSeq 2500(Illumina)
pt105	10.1126/science.aad0095	70	Male	M1c	12	Dead	PD	CTLA-4	Ipilimumab	HiSeq 2500(Illumina)
pt106	10.1126/science.aad0095	75	Male	M1c	9.6	Dead	PD	CTLA-4	Ipilimumab	HiSeq 2500(Illumina)
pt107	10.1126/science.aad0095	70	Male	M1c	34.9333	Dead	CR/PR	CTLA-4	Ipilimumab	HiSeq 2500(Illumina)
pt109	10.1126/science.aad0095	41	Male	M0	34.9	Alive	CR/PR	CTLA-4	Ipilimumab	HiSeq 2500(Illumina)
Pt11	10.1016/j.cell.2016.02.065	37	Male	M1c	15.5667	Dead	PD	PD-1/PD-L1	Pembrolizumab/Nivolumab	HiSeq 2000(Illumina)
pt111	10.1126/science.aad0095	69	Male	M1b	2.76667	Dead	PD	CTLA-4	Ipilimumab	HiSeq 2500(Illumina)
pt112	10.1126/science.aad0095	67	Male	M1c	26.3333	Alive	PD	CTLA-4	Ipilimumab	HiSeq 2500(Illumina)
pt1120	10.1056/NEJMoa1406498	68	Male	M1a	55.9667	Alive	CR/PR	CTLA-4	Ipilimumab/Tremelimumab	HiSeq 2000(Illumina)
pt11217	10.1056/NEJMoa1406498	66	Male	M1c	19.4667	Dead	CR/PR	CTLA-4	Ipilimumab/Tremelimumab	HiSeq 2000(Illumina)
pt113	10.1126/science.aad0095	76	Male	M1b	10.6667	Dead	PD	CTLA-4	Ipilimumab	HiSeq 2500(Illumina)
pt114	10.1126/science.aad0095	68	Male	M1c	10.0333	Dead	CR/PR	CTLA-4	Ipilimumab	HiSeq 2500(Illumina)
pt115	10.1126/science.aad0095	45	Male	M1c	4.83333	Dead	PD	CTLA-4	Ipilimumab	HiSeq 2500(Illumina)
pt116	10.1126/science.aad0095	73	Male	M1c	30.4667	Alive	CR/PR	CTLA-4	Ipilimumab	HiSeq 2500(Illumina)
pt118	10.1126/science.aad0095	61	Male	M0	26.9333	Alive	PD	CTLA-4	Ipilimumab	HiSeq 2500(Illumina)
pt119	10.1126/science.aad0095	46	Male	M1c	4.06667	Dead	PD	CTLA-4	Ipilimumab	HiSeq 2500(Illumina)
Pt12	10.1016/j.cell.2016.02.065	59	Male	M1c	10.9	Dead	PD	PD-1/PD-L1	Pembrolizumab/Nivolumab	HiSeq 2000(Illumina)
pt121	10.1126/science.aad0095	78	Male	M1b	4.86667	Dead	PD	CTLA-4	Ipilimumab	HiSeq 2500(Illumina)
pt122	10.1126/science.aad0095	77	Male	M1b	21.3667	Alive	CR/PR	CTLA-4	Ipilimumab	HiSeq 2500(Illumina)
pt124	10.1126/science.aad0095	29	Male	M1c	3.76667	Dead	PD	CTLA-4	Ipilimumab	HiSeq 2500(Illumina)
pt125	10.1126/science.aad0095	18	Male	M1b	17.9667	Alive	PD	CTLA-4	Ipilimumab	HiSeq 2500(Illumina)
pt126	10.1126/science.aad0095	78	Male	M0	24.4	Dead	PD	CTLA-4	Ipilimumab	HiSeq 2500(Illumina)
pt127	10.1126/science.aad0095	76	Male	M1c	1.5	Dead	PD	CTLA-4	Ipilimumab	HiSeq 2500(Illumina)
pt128	10.1126/science.aad0095	32	Male	M1c	8.56667	Dead	SD	CTLA-4	Ipilimumab	HiSeq 2500(Illumina)
pt129	10.1126/science.aad0095	81	Male	M1c	22.5333	Alive	CR/PR	CTLA-4	Ipilimumab	HiSeq 2500(Illumina)
pt12A	10.1126/scitranslmed.aah3560	70	Male	NA	27.8333	Alive	PD	CTLA-4	Ipilimumab	HiSeq 2000/2500(Illumina)
pt130	10.1126/science.aad0095	76	Male	M1b	18.0667	Dead	PD	CTLA-4	Ipilimumab	HiSeq 2500(Illumina)
pt133	10.1126/science.aad0095	58	Male	M1c	3.3	Dead	PD	CTLA-4	Ipilimumab	HiSeq 2500(Illumina)
pt135	10.1126/science.aad0095	62	Male	M1c	16.4	Dead	PD	CTLA-4	Ipilimumab	HiSeq 2500(Illumina)
pt136	10.1126/science.aad0095	71	Male	M1c	5.1	Dead	PD	CTLA-4	Ipilimumab	HiSeq 2500(Illumina)
pt137	10.1126/science.aad0095	63	Male	M1a	7.46667	Dead	PD	CTLA-4	Ipilimumab	HiSeq 2500(Illumina)
pt139	10.1126/science.aad0095	32	Male	M1c	1.66667	Dead	PD	CTLA-4	Ipilimumab	HiSeq 2500(Illumina)
pt140	10.1126/science.aad0095	68	Male	M1c	6.8	Dead	PD	CTLA-4	Ipilimumab	HiSeq 2500(Illumina)
pt142	10.1126/science.aad0095	51	Male	M1b	28.0667	Alive	PD	CTLA-4	Ipilimumab	HiSeq 2500(Illumina)
pt144	10.1126/science.aad0095	79	Male	M1c	5.06667	Dead	PD	CTLA-4	Ipilimumab	HiSeq 2500(Illumina)
pt146	10.1126/science.aad0095	54	Male	M1c	24.9667	Alive	PD	CTLA-4	Ipilimumab	HiSeq 2500(Illumina)
pt148	10.1126/science.aad0095	31	Male	M1c	2.56667	Dead	SD	CTLA-4	Ipilimumab	HiSeq 2500(Illumina)
pt149	10.1126/science.aad0095	50	Male	M1c	13.6	Dead	PD	CTLA-4	Ipilimumab	HiSeq 2500(Illumina)
pt1494	10.1056/NEJMoa1406498	70	Male	M1c	24.3333	Alive	CR/PR	CTLA-4	Ipilimumab/Tremelimumab	HiSeq 2000(Illumina)
Pt15	10.1016/j.cell.2016.02.065	70	Male	M1b	32.6667	Dead	CR/PR	PD-1/PD-L1	Pembrolizumab/Nivolumab	HiSeq 2000(Illumina)
pt150	10.1126/science.aad0095	68	Male	M1c	2.23333	Dead	SD	CTLA-4	Ipilimumab	HiSeq 2500(Illumina)
pt151	10.1126/science.aad0095	44	Male	M1c	6.83333	Dead	PD	CTLA-4	Ipilimumab	HiSeq 2500(Illumina)
pt152	10.1126/science.aad0095	48	Male	M1c	3.6	Dead	PD	CTLA-4	Ipilimumab	HiSeq 2500(Illumina)
pt153	10.1126/science.aad0095	66	Male	M1a	15.5333	Dead	PD	CTLA-4	Ipilimumab	HiSeq 2500(Illumina)
pt157	10.1126/science.aad0095	59	Male	M1c	5.83333	Dead	PD	CTLA-4	Ipilimumab	HiSeq 2500(Illumina)
pt158	10.1126/science.aad0095	81	Male	M1c	22.5333	Dead	SD	CTLA-4	Ipilimumab	HiSeq 2500(Illumina)
Pt16	10.1016/j.cell.2016.02.065	19	Male	M1b	6.2	Dead	PD	PD-1/PD-L1	Pembrolizumab/Nivolumab	HiSeq 2000(Illumina)
pt160	10.1126/science.aad0095	69	Male	M1c	10.8333	Dead	PD	CTLA-4	Ipilimumab	HiSeq 2500(Illumina)
pt161	10.1126/science.aad0095	61	Male	M1c	45.9667	Alive	PD	CTLA-4	Ipilimumab	HiSeq 2500(Illumina)
pt162	10.1126/science.aad0095	77	Male	M1c	39.4667	Dead	PD	CTLA-4	Ipilimumab	HiSeq 2500(Illumina)
pt163	10.1126/science.aad0095	82	Male	M1c	44.2	Alive	SD	CTLA-4	Ipilimumab	HiSeq 2500(Illumina)
pt164	10.1126/science.aad0095	72	Male	M1c	4.9	Dead	PD	CTLA-4	Ipilimumab	HiSeq 2500(Illumina)
pt165	10.1126/science.aad0095	65	Male	M1c	7.03333	Dead	PD	CTLA-4	Ipilimumab	HiSeq 2500(Illumina)
pt168	10.1126/science.aad0095	45	Male	M1c	51.3	Alive	CR/PR	CTLA-4	Ipilimumab	HiSeq 2500(Illumina)
pt169	10.1126/science.aad0095	67	Male	M1b	49.5667	Alive	CR/PR	CTLA-4	Ipilimumab	HiSeq 2500(Illumina)
pt16C	10.1126/scitranslmed.aah3560	34	Male	NA	20.4333	Dead	PD	CTLA-4 plus PD-1/PD-L1	Ipilimumab+Pembrolizumab	HiSeq 2000/2500(Illumina)
pt16D	10.1126/scitranslmed.aah3560	34	Male	NA	20.4333	Dead	PD	CTLA-4 plus PD-1/PD-L1	Ipilimumab+Pembrolizumab	HiSeq 2000/2500(Illumina)
Pt17	10.1016/j.cell.2016.02.065	67	Male	M1a	31.7667	Dead	PD	PD-1/PD-L1	Pembrolizumab/Nivolumab	HiSeq 2000(Illumina)
pt170	10.1126/science.aad0095	74	Male	M1c	1.13333	Dead	PD	CTLA-4	Ipilimumab	HiSeq 2500(Illumina)
pt171	10.1126/science.aad0095	64	Male	M1c	4.26667	Dead	PD	CTLA-4	Ipilimumab	HiSeq 2500(Illumina)
pt174	10.1126/science.aad0095	68	Male	M1c	2.96667	Dead	PD	CTLA-4	Ipilimumab	HiSeq 2500(Illumina)
pt176	10.1126/science.aad0095	78	Male	M1c	36.8667	Alive	CR/PR	CTLA-4	Ipilimumab	HiSeq 2500(Illumina)
pt177	10.1126/science.aad0095	36	Male	M1c	34.4667	Alive	SD	CTLA-4	Ipilimumab	HiSeq 2500(Illumina)
pt178	10.1126/science.aad0095	77	Male	M1c	2.16667	Dead	PD	CTLA-4	Ipilimumab	HiSeq 2500(Illumina)
pt179	10.1126/science.aad0095	73	Male	M1c	6.93333	Dead	PD	CTLA-4	Ipilimumab	HiSeq 2500(Illumina)
Pt18	10.1016/j.cell.2016.02.065	64	Male	M1c	36.0333	Alive	CR/PR	PD-1/PD-L1	Pembrolizumab/Nivolumab	HiSeq 2000(Illumina)
pt181	10.1126/science.aad0095	68	Male	M1c	7.83333	Dead	PD	CTLA-4	Ipilimumab	HiSeq 2500(Illumina)
pt182	10.1126/science.aad0095	69	Male	M0	8.33333	Dead	PD	CTLA-4	Ipilimumab	HiSeq 2500(Illumina)
pt184	10.1126/science.aad0095	36	Male	M1b	7.46667	Dead	PD	CTLA-4	Ipilimumab	HiSeq 2500(Illumina)
pt185	10.1126/science.aad0095	86	Male	M1c	9.06667	Dead	PD	CTLA-4	Ipilimumab	HiSeq 2500(Illumina)
pt186	10.1126/science.aad0095	76	Male	M1c	20.0667	Dead	PD	CTLA-4	Ipilimumab	HiSeq 2500(Illumina)
pt1867	10.1056/NEJMoa1406498	68	Male	M1c	18.2667	Dead	PD	CTLA-4	Ipilimumab/Tremelimumab	HiSeq 2000(Illumina)
pt187	10.1126/science.aad0095	65	Male	M0	34.6333	Alive	CR/PR	CTLA-4	Ipilimumab	HiSeq 2500(Illumina)
pt188	10.1126/science.aad0095	83	Male	M1c	3.53333	Dead	PD	CTLA-4	Ipilimumab	HiSeq 2500(Illumina)
Pt19	10.1016/j.cell.2016.02.065	45	Male	M1c	35.3333	Alive	CR/PR	PD-1/PD-L1	Pembrolizumab/Nivolumab	HiSeq 2000(Illumina)
pt190	10.1126/science.aad0095	39	Male	M1c	2.63333	Dead	PD	CTLA-4	Ipilimumab	HiSeq 2500(Illumina)
pt191	10.1126/science.aad0095	38	Male	M1c	17.7333	Dead	PD	CTLA-4	Ipilimumab	HiSeq 2500(Illumina)
pt192	10.1126/science.aad0095	63	Male	M1c	4.56667	Dead	PD	CTLA-4	Ipilimumab	HiSeq 2500(Illumina)
pt193	10.1126/science.aad0095	71	Male	M1c	14.7333	Dead	CR/PR	CTLA-4	Ipilimumab	HiSeq 2500(Illumina)
pt194	10.1126/science.aad0095	73	Male	M1c	6.43333	Dead	PD	CTLA-4	Ipilimumab	HiSeq 2500(Illumina)
pt195	10.1126/science.aad0095	74	Male	M1c	4.63333	Dead	PD	CTLA-4	Ipilimumab	HiSeq 2500(Illumina)
pt196	10.1126/science.aad0095	21	Male	M0	34.3	Alive	CR/PR	CTLA-4	Ipilimumab	HiSeq 2500(Illumina)
pt198	10.1126/science.aad0095	69	Male	M1b	26.7	Dead	CR/PR	CTLA-4	Ipilimumab	HiSeq 2500(Illumina)
pt199	10.1126/science.aad0095	48	Male	M1c	24.1333	Dead	SD	CTLA-4	Ipilimumab	HiSeq 2500(Illumina)
pt19D	10.1126/scitranslmed.aah3560	55	Male	NA	21.2	Dead	PD	CTLA-4 plus PD-1/PD-L1	Ipilimumab+Pembrolizumab	HiSeq 2000/2500(Illumina)
Pt2	10.1016/j.cell.2016.02.065	55	Male	M1c	30.9	Alive	CR/PR	PD-1/PD-L1	Pembrolizumab/Nivolumab	HiSeq 2000(Illumina)
pt202	10.1126/science.aad0095	22	Male	M1c	34.2333	Alive	PD	CTLA-4	Ipilimumab	HiSeq 2500(Illumina)
pt203	10.1126/science.aad0095	83	Male	M1c	15.2667	Dead	PD	CTLA-4	Ipilimumab	HiSeq 2500(Illumina)
pt204	10.1126/science.aad0095	55	Male	M1a	9.76667	Dead	SD	CTLA-4	Ipilimumab	HiSeq 2500(Illumina)
pt206	10.1126/science.aad0095	59	Male	M1c	33.5	Alive	CR/PR	CTLA-4	Ipilimumab	HiSeq 2500(Illumina)
pt207	10.1126/science.aad0095	49	Male	M1c	4.1	Dead	PD	CTLA-4	Ipilimumab	HiSeq 2500(Illumina)
pt20A	10.1126/scitranslmed.aah3560	59	Male	NA	26.1333	Alive	PD	CTLA-4 plus PD-1/PD-L1	Ipilimumab+Pembrolizumab	HiSeq 2000/2500(Illumina)
pt20E	10.1126/scitranslmed.aah3560	59	Male	NA	26.1333	Alive	PD	CTLA-4 plus PD-1/PD-L1	Ipilimumab+Pembrolizumab	HiSeq 2000/2500(Illumina)
Pt21	10.1016/j.cell.2016.02.065	60	Male	M1b	31.5	Dead	CR/PR	PD-1/PD-L1	Pembrolizumab/Nivolumab	HiSeq 2000(Illumina)
pt2137	10.1056/NEJMoa1406498	18	Male	M1c	9.73333	Dead	PD	CTLA-4	Ipilimumab/Tremelimumab	HiSeq 2000(Illumina)
pt21C	10.1126/scitranslmed.aah3560	63	Male	NA	8.23333	Dead	PD	CTLA-4 plus PD-1/PD-L1	Ipilimumab+Pembrolizumab	HiSeq 2000/2500(Illumina)
Pt22	10.1016/j.cell.2016.02.065	55	Male	M1c	6.06667	Dead	PD	PD-1/PD-L1	Pembrolizumab/Nivolumab	HiSeq 2000(Illumina)
pt22640	10.1056/NEJMoa1406498	71	Male	M1c	52.3333	Alive	CR/PR	CTLA-4	Ipilimumab/Tremelimumab	HiSeq 2000(Illumina)
Pt23	10.1016/j.cell.2016.02.065	63	Male	M1c	3.43333	Dead	PD	PD-1/PD-L1	Pembrolizumab/Nivolumab	HiSeq 2000(Illumina)
pt23A	10.1126/scitranslmed.aah3560	40	Male	NA	22.3333	Alive	PD	CTLA-4 plus PD-1/PD-L1	Ipilimumab+Pembrolizumab	HiSeq 2000/2500(Illumina)
Pt24	10.1016/j.cell.2016.02.065	70	Male	M1c	32.4667	Dead	CR/PR	PD-1/PD-L1	Pembrolizumab/Nivolumab	HiSeq 2000(Illumina)
pt2472	10.1056/NEJMoa1406498	71	Male	M1c	20.7	Alive	CR/PR	CTLA-4	Ipilimumab/Tremelimumab	HiSeq 2000(Illumina)
pt24C	10.1126/scitranslmed.aah3560	50	Male	NA	41.8	Alive	PD	CTLA-4 plus PD-1/PD-L1	Ipilimumab+Pembrolizumab	HiSeq 2000/2500(Illumina)
Pt25	10.1016/j.cell.2016.02.065	74	Male	M1c	8.73333	Dead	PD	PD-1/PD-L1	Pembrolizumab/Nivolumab	HiSeq 2000(Illumina)
Pt26	10.1016/j.cell.2016.02.065	71	Male	M1c	44.5333	Alive	CR/PR	PD-1/PD-L1	Pembrolizumab/Nivolumab	HiSeq 2000(Illumina)
Pt27	10.1016/j.cell.2016.02.065	83	Male	M1c	18.2667	Alive	CR/PR	PD-1/PD-L1	Pembrolizumab/Nivolumab	HiSeq 2000(Illumina)
Pt28	10.1016/j.cell.2016.02.065	82	Male	M1c	14.6333	Dead	CR/PR	PD-1/PD-L1	Pembrolizumab/Nivolumab	HiSeq 2000(Illumina)
pt28A	10.1126/scitranslmed.aah3560	55	Male	NA	10.4667	Dead	PD	CTLA-4 plus PD-1/PD-L1	Ipilimumab+Pembrolizumab	HiSeq 2000/2500(Illumina)
pt28D	10.1126/scitranslmed.aah3560	55	Male	NA	10.4667	Dead	PD	CTLA-4 plus PD-1/PD-L1	Ipilimumab+Pembrolizumab	HiSeq 2000/2500(Illumina)
Pt29	10.1016/j.cell.2016.02.065	84	Male	M1c	8.96667	Dead	PD	PD-1/PD-L1	Pembrolizumab/Nivolumab	HiSeq 2000(Illumina)
pt29C	10.1126/scitranslmed.aah3560	34	Male	NA	18.2667	Dead	PD	CTLA-4 plus PD-1/PD-L1	Ipilimumab+Pembrolizumab	HiSeq 2000/2500(Illumina)
pt2E	10.1126/scitranslmed.aah3560	50	Male	NA	23.9667	Alive	PD	CTLA-4 plus PD-1/PD-L1	Ipilimumab+Pembrolizumab	HiSeq 2000/2500(Illumina)
Pt3	10.1016/j.cell.2016.02.065	58	Male	M1c	23.0333	Dead	CR/PR	PD-1/PD-L1	Pembrolizumab/Nivolumab	HiSeq 2000(Illumina)
pt3086	10.1056/NEJMoa1406498	43	Male	M1c	31.6333	Dead	CR/PR	CTLA-4	Ipilimumab/Tremelimumab	HiSeq 2000(Illumina)
Pt31	10.1016/j.cell.2016.02.065	47	Male	M1c	23.4667	Alive	PD	PD-1/PD-L1	Pembrolizumab/Nivolumab	HiSeq 2000(Illumina)
Pt32	10.1016/j.cell.2016.02.065	47	Male	M1c	5.7	Dead	PD	PD-1/PD-L1	Pembrolizumab/Nivolumab	HiSeq 2000(Illumina)
Pt34	10.1016/j.cell.2016.02.065	42	Male	M1c	13.9333	Alive	CR/PR	PD-1/PD-L1	Pembrolizumab/Nivolumab	HiSeq 2000(Illumina)
pt3484	10.1056/NEJMoa1406498	74	Male	M1c	35.3	Alive	CR/PR	CTLA-4	Ipilimumab/Tremelimumab	HiSeq 2000(Illumina)
pt34A	10.1126/scitranslmed.aah3560	69	Male	NA	20.2667	Alive	CR/PR	CTLA-4 plus PD-1/PD-L1	Ipilimumab+Pembrolizumab	HiSeq 2000/2500(Illumina)
pt3549	10.1056/NEJMoa1406498	50	Male	M1c	6.1	Dead	PD	CTLA-4	Ipilimumab/Tremelimumab	HiSeq 2000(Illumina)
pt3665	10.1056/NEJMoa1406498	70	Male	M1b	32.8667	Alive	CR/PR	CTLA-4	Ipilimumab/Tremelimumab	HiSeq 2000(Illumina)
pt37B	10.1126/scitranslmed.aah3560	82	Male	NA	18.3667	Dead	CR/PR	CTLA-4	Ipilimumab	HiSeq 2000/2500(Illumina)
pt39	10.1056/NEJMoa1604958	58	Male	M1c	23.0333	NA	CR/PR	PD-1/PD-L1	Pembrolizumab	HiSeq 2000(Illumina)
Pt4	10.1016/j.cell.2016.02.065	62	Male	M1c	31.6	Alive	CR/PR	PD-1/PD-L1	Pembrolizumab/Nivolumab	HiSeq 2000(Illumina)
pt40	10.1056/NEJMoa1604958	60	Male	M1b	31.5	NA	CR/PR	PD-1/PD-L1	Pembrolizumab	HiSeq 2000(Illumina)
pt4018	10.1056/NEJMoa1406498	55	Male	M1c	3.66667	Dead	PD	CTLA-4	Ipilimumab/Tremelimumab	HiSeq 2000(Illumina)
pt4035	10.1056/NEJMoa1406498	78	Male	M1c	51.1	Alive	CR/PR	CTLA-4	Ipilimumab/Tremelimumab	HiSeq 2000(Illumina)
pt4045	10.1056/NEJMoa1406498	42	Male	M1c	20.7	Dead	PD	CTLA-4	Ipilimumab/Tremelimumab	HiSeq 2000(Illumina)
pt4046	10.1056/NEJMoa1406498	44	Male	M1a	25.5667	Alive	CR/PR	CTLA-4	Ipilimumab/Tremelimumab	HiSeq 2000(Illumina)
pt4077	10.1056/NEJMoa1406498	75	Male	M1c	74.2333	Alive	CR/PR	CTLA-4	Ipilimumab/Tremelimumab	HiSeq 2000(Illumina)
pt4083	10.1056/NEJMoa1406498	54	Male	M1c	2.43333	Dead	PD	CTLA-4	Ipilimumab/Tremelimumab	HiSeq 2000(Illumina)
pt41	10.1056/NEJMoa1604958	70	Male	M1c	32.4667	NA	CR/PR	PD-1/PD-L1	Pembrolizumab	HiSeq 2000(Illumina)
pt41A	10.1126/scitranslmed.aah3560	68	Male	NA	28.7	Alive	PD	CTLA-4 plus PD-1/PD-L1	Ipilimumab+Pembrolizumab	HiSeq 2000/2500(Illumina)
pt42	10.1056/NEJMoa1604958	61	Male	M1c	42.0667	NA	CR/PR	PD-1/PD-L1	Pembrolizumab	HiSeq 2000(Illumina)
pt45C	10.1126/scitranslmed.aah3560	59	Male	NA	44	Alive	PD	CTLA-4 plus PD-1/PD-L1	Ipilimumab+Pembrolizumab	HiSeq 2000/2500(Illumina)
pt45E	10.1126/scitranslmed.aah3560	59	Male	NA	44	Alive	PD	CTLA-4 plus PD-1/PD-L1	Ipilimumab+Pembrolizumab	HiSeq 2000/2500(Illumina)
pt4631	10.1056/NEJMoa1406498	59	Male	M1c	6.1	Dead	PD	CTLA-4	Ipilimumab/Tremelimumab	HiSeq 2000(Illumina)
pt4691	10.1056/NEJMoa1406498	62	Male	M1c	88.8333	Alive	CR/PR	CTLA-4	Ipilimumab/Tremelimumab	HiSeq 2000(Illumina)
pt4744	10.1056/NEJMoa1406498	52	Male	M1c	25.5667	Alive	CR/PR	CTLA-4	Ipilimumab/Tremelimumab	HiSeq 2000(Illumina)
pt47A	10.1126/scitranslmed.aah3560	72	Male	NA	36.4	Alive	CR/PR	CTLA-4 plus PD-1/PD-L1	Ipilimumab+Pembrolizumab	HiSeq 2000/2500(Illumina)
pt47D	10.1126/scitranslmed.aah3560	72	Male	NA	36.4	Alive	CR/PR	CTLA-4 plus PD-1/PD-L1	Ipilimumab+Pembrolizumab	HiSeq 2000/2500(Illumina)
pt4880	10.1056/NEJMoa1406498	63	Male	M1b	65.7	Alive	CR/PR	CTLA-4	Ipilimumab/Tremelimumab	HiSeq 2000(Illumina)
pt49E	10.1126/scitranslmed.aah3560	46	Male	NA	36.4667	Dead	PD	CTLA-4 plus PD-1/PD-L1	Ipilimumab+Pembrolizumab	HiSeq 2000/2500(Illumina)
pt4D	10.1126/scitranslmed.aah3560	72	Male	NA	36.1	Dead	PD	CTLA-4 plus PD-1/PD-L1	Ipilimumab+Pembrolizumab	HiSeq 2000/2500(Illumina)
Pt5	10.1016/j.cell.2016.02.065	61	Male	M1c	14.6333	Alive	CR/PR	PD-1/PD-L1	Pembrolizumab/Nivolumab	HiSeq 2000(Illumina)
pt5038	10.1056/NEJMoa1406498	55	Male	M1c	14.6	Dead	PD	CTLA-4	Ipilimumab/Tremelimumab	HiSeq 2000(Illumina)
pt50A	10.1126/scitranslmed.aah3560	68	Male	NA	53.8667	Alive	PD	CTLA-4 plus PD-1/PD-L1	Ipilimumab+Pembrolizumab	HiSeq 2000/2500(Illumina)
pt50C	10.1126/scitranslmed.aah3560	68	Male	NA	53.8667	Alive	PD	CTLA-4 plus PD-1/PD-L1	Ipilimumab+Pembrolizumab	HiSeq 2000/2500(Illumina)
pt53A	10.1126/scitranslmed.aah3560	54	Male	NA	9.23333	Dead	PD	CTLA-4 plus PD-1/PD-L1	Ipilimumab+Pembrolizumab	HiSeq 2000/2500(Illumina)
pt53D	10.1126/scitranslmed.aah3560	54	Male	NA	9.23333	Dead	PD	CTLA-4 plus PD-1/PD-L1	Ipilimumab+Pembrolizumab	HiSeq 2000/2500(Illumina)
pt54A	10.1126/scitranslmed.aah3560	28	Male	NA	23.8	Alive	PD	CTLA-4 plus PD-1/PD-L1	Ipilimumab+Pembrolizumab	HiSeq 2000/2500(Illumina)
pt54C	10.1126/scitranslmed.aah3560	28	Male	NA	23.8	Alive	PD	CTLA-4 plus PD-1/PD-L1	Ipilimumab+Pembrolizumab	HiSeq 2000/2500(Illumina)
pt5934	10.1056/NEJMoa1406498	52	Male	M1c	19.4667	Dead	PD	CTLA-4	Ipilimumab/Tremelimumab	HiSeq 2000(Illumina)
Pt6	10.1016/j.cell.2016.02.065	51	Male	M1c	29.4	Alive	CR/PR	PD-1/PD-L1	Pembrolizumab/Nivolumab	HiSeq 2000(Illumina)
pt6161	10.1056/NEJMoa1406498	81	Male	M1b	31.6333	Dead	CR/PR	CTLA-4	Ipilimumab/Tremelimumab	HiSeq 2000(Illumina)
pt6336	10.1056/NEJMoa1406498	53	Male	M1c	83.9667	Alive	CR/PR	CTLA-4	Ipilimumab/Tremelimumab	HiSeq 2000(Illumina)
pt6721	10.1056/NEJMoa1406498	64	Male	M1a	9.73333	Dead	PD	CTLA-4	Ipilimumab/Tremelimumab	HiSeq 2000(Illumina)
pt6819	10.1056/NEJMoa1406498	55	Male	M1c	41.3667	Alive	CR/PR	CTLA-4	Ipilimumab/Tremelimumab	HiSeq 2000(Illumina)
pt6842	10.1056/NEJMoa1406498	64	Male	M1c	9.73333	Dead	PD	CTLA-4	Ipilimumab/Tremelimumab	HiSeq 2000(Illumina)
pt6B	10.1126/scitranslmed.aah3560	48	Male	NA	28.0667	Dead	PD	CTLA-4 plus PD-1/PD-L1	Ipilimumab+Pembrolizumab	HiSeq 2000/2500(Illumina)
pt7623	10.1056/NEJMoa1406498	62	Male	M1c	48.6667	Alive	CR/PR	CTLA-4	Ipilimumab/Tremelimumab	HiSeq 2000(Illumina)
pt7A	10.1126/scitranslmed.aah3560	64	Male	NA	39.1333	Alive	CR/PR	CTLA-4 plus PD-1/PD-L1	Ipilimumab+Pembrolizumab	HiSeq 2000/2500(Illumina)
pt7D	10.1126/scitranslmed.aah3560	64	Male	NA	39.1333	Alive	CR/PR	CTLA-4 plus PD-1/PD-L1	Ipilimumab+Pembrolizumab	HiSeq 2000/2500(Illumina)
Pt8	10.1016/j.cell.2016.02.065	69	Male	M1a	NA	Alive	CR/PR	PD-1/PD-L1	Pembrolizumab/Nivolumab	HiSeq 2000(Illumina)
Pt9	10.1016/j.cell.2016.02.065	68	Male	M0	35.1333	Alive	CR/PR	PD-1/PD-L1	Pembrolizumab/Nivolumab	HiSeq 2000(Illumina)
pt9306	10.1056/NEJMoa1406498	65	Male	M1c	64.5	Alive	CR/PR	CTLA-4	Ipilimumab/Tremelimumab	HiSeq 2000(Illumina)
pt9341	10.1056/NEJMoa1406498	77	Male	M1a	12.1667	Dead	PD	CTLA-4	Ipilimumab/Tremelimumab	HiSeq 2000(Illumina)
pt9445	10.1056/NEJMoa1406498	50	Male	M1c	2.43333	Dead	PD	CTLA-4	Ipilimumab/Tremelimumab	HiSeq 2000(Illumina)
pt9521	10.1056/NEJMoa1406498	74	Male	M1b	32.8667	Dead	PD	CTLA-4	Ipilimumab/Tremelimumab	HiSeq 2000(Illumina)
pt9699	10.1056/NEJMoa1406498	70	Male	M1c	53.5333	Alive	CR/PR	CTLA-4	Ipilimumab/Tremelimumab	HiSeq 2000(Illumina)
pt9A	10.1126/scitranslmed.aah3560	58	Male	NA	40.4333	Alive	PD	CTLA-4 plus PD-1/PD-L1	Ipilimumab+Pembrolizumab	HiSeq 2000/2500(Illumina)
pt9C	10.1126/scitranslmed.aah3560	58	Male	NA	40.4333	Alive	PD	CTLA-4 plus PD-1/PD-L1	Ipilimumab+Pembrolizumab	HiSeq 2000/2500(Illumina)
pt9D	10.1126/scitranslmed.aah3560	58	Male	NA	40.4333	Alive	PD	CTLA-4 plus PD-1/PD-L1	Ipilimumab+Pembrolizumab	HiSeq 2000/2500(Illumina)
CR0095_T_N	10.1038/s41588-018-0200-2	NA	Male	NA	69.35	Dead	CR/PR	CTLA-4	NA	HiSeq 2500(Illumina)
CR22640_T_N	10.1038/s41588-018-0200-2	NA	Male	NA	52.3167	Dead	CR/PR	CTLA-4	NA	HiSeq 2500(Illumina)
CR3665_T_N	10.1038/s41588-018-0200-2	NA	Male	NA	32.85	Dead	CR/PR	CTLA-4	NA	HiSeq 2500(Illumina)
CR6161_T_N	10.1038/s41588-018-0200-2	NA	Male	NA	31.7333	Alive	CR/PR	CTLA-4	NA	HiSeq 2500(Illumina)
CR9306_T_N	10.1038/s41588-018-0200-2	NA	Male	NA	64.4833	Dead	CR/PR	CTLA-4	NA	HiSeq 2500(Illumina)
CR9699_T_N	10.1038/s41588-018-0200-2	NA	Male	NA	53.5333	Dead	CR/PR	CTLA-4	NA	HiSeq 2500(Illumina)
LSD0167_T_N	10.1038/s41588-018-0200-2	NA	Male	NA	32.85	Dead	SD	CTLA-4	NA	HiSeq 2500(Illumina)
LSD3484_T_N	10.1038/s41588-018-0200-2	NA	Male	NA	35.9333	Dead	SD	CTLA-4	NA	HiSeq 2500(Illumina)
LSD4744_T_N	10.1038/s41588-018-0200-2	NA	Male	NA	25.55	Dead	SD	CTLA-4	NA	HiSeq 2500(Illumina)
LSD6819_T_N	10.1038/s41588-018-0200-2	NA	Male	NA	41.3667	Dead	SD	CTLA-4	NA	HiSeq 2500(Illumina)
MEL-587761-TP-NB-SM-CN1ZV-SM-CJP7Q	10.1038/s41588-018-0200-2	NA	Male	NA	19.4667	Dead	SD	CTLA-4 plus PD-1/PD-L1	NA	HiSeq 2500(Illumina)
MEL-IPI_Pat04-TP-NB-SM-4DJZZ-SM-4NFU6	10.1038/s41588-018-0200-2	71	Male	NA	32.9	Dead	CR/PR	CTLA-4	NA	HiSeq 2500(Illumina)
MEL-IPI_Pat06-TP-NB-SM-4DK12-SM-4NFU8	10.1038/s41588-018-0200-2	33	Male	NA	5.36667	Alive	PD	CTLA-4	NA	HiSeq 2500(Illumina)
MEL-IPI_Pat07-TP-NB-SM-4DK13-SM-4NFU9	10.1038/s41588-018-0200-2	35	Male	NA	35	Dead	SD	CTLA-4	NA	HiSeq 2500(Illumina)
MEL-IPI_Pat08-TP-NB-SM-4DK14-SM-4NFUA	10.1038/s41588-018-0200-2	73	Male	NA	4.66667	Alive	PD	CTLA-4	NA	HiSeq 2500(Illumina)
MEL-IPI_Pat100-TP-NT-SM-53U2D-SM-53U4M	10.1038/s41588-018-0200-2	71	Male	NA	12	Alive	PD	CTLA-4	NA	HiSeq 2500(Illumina)
MEL-IPI_Pat101-TP-NT-SM-4CU6O-SM-53U4N	10.1038/s41588-018-0200-2	75	Male	NA	9.6	Alive	PD	CTLA-4	NA	HiSeq 2500(Illumina)
MEL-IPI_Pat103-TP-NT-SM-4CU6Q-SM-53U4P	10.1038/s41588-018-0200-2	70	Male	NA	34.9333	Alive	CR/PR	CTLA-4	NA	HiSeq 2500(Illumina)
MEL-IPI_Pat105-TP-NT-SM-4CU6S-SM-53U4R	10.1038/s41588-018-0200-2	41	Male	NA	34.9	Dead	CR/PR	CTLA-4	NA	HiSeq 2500(Illumina)
MEL-IPI_Pat11-TP-NB-SM-4DK17-SM-4NFUD	10.1038/s41588-018-0200-2	67	Male	NA	26.3333	Dead	PD	CTLA-4	NA	HiSeq 2500(Illumina)
MEL-IPI_Pat110-TP-NT-SM-4CU6X-SM-4MGPO	10.1038/s41588-018-0200-2	76	Male	NA	10.6667	Alive	PD	CTLA-4	NA	HiSeq 2500(Illumina)
MEL-IPI_Pat111-TP-NT-SM-4CU6Y-SM-4MGPP	10.1038/s41588-018-0200-2	84	Male	NA	20.6	Alive	PD	CTLA-4	NA	HiSeq 2500(Illumina)
MEL-IPI_Pat113-TP-NT-SM-53U2Q-SM-4MGPR	10.1038/s41588-018-0200-2	68	Male	NA	10.0333	Alive	CR/PR	CTLA-4	NA	HiSeq 2500(Illumina)
MEL-IPI_Pat115-TP-NT-SM-5X2QS-SM-5X2RA	10.1038/s41588-018-0200-2	46	Male	NA	4.83333	Alive	PD	CTLA-4	NA	HiSeq 2500(Illumina)
MEL-IPI_Pat117-TP-NT-SM-5X2QU-SM-5X2RC	10.1038/s41588-018-0200-2	74	Male	NA	30.4667	Dead	CR/PR	CTLA-4	NA	HiSeq 2500(Illumina)
MEL-IPI_Pat119-TP-NT-SM-7459N-SM-7459Q	10.1038/s41588-018-0200-2	61	Male	NA	26.9333	Dead	PD	CTLA-4	NA	HiSeq 2500(Illumina)
MEL-IPI_Pat12-TP-NB-SM-7459O-SM-4NFUE	10.1038/s41588-018-0200-2	41	Male	NA	9.66667	Alive	PD	CTLA-4	NA	HiSeq 2500(Illumina)
MEL-IPI_Pat121-TP-NT-SM-7459K-SM-5X2RG	10.1038/s41588-018-0200-2	47	Male	NA	4.06667	Alive	PD	CTLA-4	NA	HiSeq 2500(Illumina)
MEL-IPI_Pat124-TP-NB-SM-7459L-SM-5VWHM	10.1038/s41588-018-0200-2	78	Male	NA	4.86667	Alive	PD	CTLA-4	NA	HiSeq 2500(Illumina)
MEL-IPI_Pat126-TP-NB-SM-5X2R4-SM-5VWHO	10.1038/s41588-018-0200-2	77	Male	NA	21.3667	Dead	CR/PR	CTLA-4	NA	HiSeq 2500(Illumina)
MEL-IPI_Pat128-TP-NB-SM-5X2R6-SM-5VWHQ	10.1038/s41588-018-0200-2	30	Male	NA	3.76667	Alive	PD	CTLA-4	NA	HiSeq 2500(Illumina)
MEL-IPI_Pat129-TP-NT-SM-5X2R7-SM-5X2RI	10.1038/s41588-018-0200-2	18	Male	NA	17.9667	Dead	PD	CTLA-4	NA	HiSeq 2500(Illumina)
MEL-IPI_Pat13-TP-NB-SM-4DK19-SM-4NFUF	10.1038/s41588-018-0200-2	78	Male	NA	24.4	Alive	PD	CTLA-4	NA	HiSeq 2500(Illumina)
MEL-IPI_Pat132-TP-NB-SM-5VWJA-SM-5VWHR	10.1038/s41588-018-0200-2	81	Male	NA	22.5333	Dead	CR/PR	CTLA-4	NA	HiSeq 2500(Illumina)
MEL-IPI_Pat133-TP-NB-SM-7A14Z-SM-5VWHS	10.1038/s41588-018-0200-2	75	Male	NA	18.0667	Alive	PD	CTLA-4	NA	HiSeq 2500(Illumina)
MEL-IPI_Pat134-TP-NB-SM-5VWJC-SM-5VWHT	10.1038/s41588-018-0200-2	73	Male	NA	10.0667	Alive	PD	CTLA-4	NA	HiSeq 2500(Illumina)
MEL-IPI_Pat139-TP-NB-SM-5VWJH-SM-5VWHY	10.1038/s41588-018-0200-2	58	Male	NA	3.3	Alive	PD	CTLA-4	NA	HiSeq 2500(Illumina)
MEL-IPI_Pat140-TP-NB-SM-5VWJI-SM-5VWHZ	10.1038/s41588-018-0200-2	62	Male	NA	16.4	Alive	PD	CTLA-4	NA	HiSeq 2500(Illumina)
MEL-IPI_Pat143-TP-NB-SM-7A156-SM-5VWI3	10.1038/s41588-018-0200-2	71	Male	NA	5.1	Alive	PD	CTLA-4	NA	HiSeq 2500(Illumina)
MEL-IPI_Pat144-TP-NB-SM-7A157-SM-5VWI4	10.1038/s41588-018-0200-2	65	Male	NA	29	Alive	CR/PR	CTLA-4	NA	HiSeq 2500(Illumina)
MEL-IPI_Pat147-TP-NB-SM-7A158-SM-5VWI7	10.1038/s41588-018-0200-2	63	Male	NA	7.46667	Alive	PD	CTLA-4	NA	HiSeq 2500(Illumina)
MEL-IPI_Pat15-TP-NB-SM-4DK1B-SM-4NFUH	10.1038/s41588-018-0200-2	32	Male	NA	1.66667	Alive	PD	CTLA-4	NA	HiSeq 2500(Illumina)
MEL-IPI_Pat151-TP-NB-SM-7A15A-SM-5VWIB	10.1038/s41588-018-0200-2	68	Male	NA	6.8	Alive	PD	CTLA-4	NA	HiSeq 2500(Illumina)
MEL-IPI_Pat159-TP-NB-SM-5VWK2-SM-5VWIJ	10.1038/s41588-018-0200-2	52	Male	NA	28.0667	Dead	PD	CTLA-4	NA	HiSeq 2500(Illumina)
MEL-IPI_Pat160-TP-NB-SM-5VWK3-SM-5VWIK	10.1038/s41588-018-0200-2	79	Male	NA	5.06667	Alive	PD	CTLA-4	NA	HiSeq 2500(Illumina)
MEL-IPI_Pat163-TP-NB-SM-5VWK6-SM-5VWIN	10.1038/s41588-018-0200-2	54	Male	NA	24.9667	Dead	PD	CTLA-4	NA	HiSeq 2500(Illumina)
MEL-IPI_Pat166-TP-NB-SM-7A15G-SM-5VWIQ	10.1038/s41588-018-0200-2	31	Male	NA	2.56667	Alive	NA	CTLA-4	NA	HiSeq 2500(Illumina)
MEL-IPI_Pat167-TP-NB-SM-7A15H-SM-5VWIR	10.1038/s41588-018-0200-2	50	Male	NA	13.6	Alive	PD	CTLA-4	NA	HiSeq 2500(Illumina)
MEL-IPI_Pat168-TP-NB-SM-5VOAX-SM-5VWIS	10.1038/s41588-018-0200-2	69	Male	NA	2.23333	Alive	NA	CTLA-4	NA	HiSeq 2500(Illumina)
MEL-IPI_Pat17-TP-NB-SM-4DK1D-SM-4NFUJ	10.1038/s41588-018-0200-2	44	Male	NA	6.83333	Alive	PD	CTLA-4	NA	HiSeq 2500(Illumina)
MEL-IPI_Pat170-TP-NB-SM-5VOAZ-SM-5VWIU	10.1038/s41588-018-0200-2	48	Male	NA	3.6	Alive	PD	CTLA-4	NA	HiSeq 2500(Illumina)
MEL-IPI_Pat171-TP-NB-SM-7A15J-SM-5VWIV	10.1038/s41588-018-0200-2	66	Male	NA	15.5333	Alive	PD	CTLA-4	NA	HiSeq 2500(Illumina)
MEL-IPI_Pat21-TP-NT-SM-4DK1H-SM-53U5G	10.1038/s41588-018-0200-2	81	Male	NA	22.5333	Alive	SD	CTLA-4	NA	HiSeq 2500(Illumina)
MEL-IPI_Pat27-TP-NB-SM-4DK1N-SM-4NFUT	10.1038/s41588-018-0200-2	61	Male	NA	45.9667	Dead	PD	CTLA-4	NA	HiSeq 2500(Illumina)
MEL-IPI_Pat32-TP-NT-SM-53U3T-SM-53U67	10.1038/s41588-018-0200-2	73	Male	NA	4.9	Alive	PD	CTLA-4	NA	HiSeq 2500(Illumina)
MEL-IPI_Pat39-TP-NB-SM-4DK1Z-SM-4NFV6	10.1038/s41588-018-0200-2	67	Male	NA	49.5667	Dead	CR/PR	CTLA-4	NA	HiSeq 2500(Illumina)
MEL-IPI_Pat41-TP-NT-SM-4DK22-SM-53U5O	10.1038/s41588-018-0200-2	64	Male	NA	4.26667	Alive	PD	CTLA-4	NA	HiSeq 2500(Illumina)
MEL-IPI_Pat45-TP-NT-SM-4DK26-SM-53U5R	10.1038/s41588-018-0200-2	69	Male	NA	2.96667	Alive	PD	CTLA-4	NA	HiSeq 2500(Illumina)
MEL-IPI_Pat47-TP-NT-SM-4DK28-SM-53U5U	10.1038/s41588-018-0200-2	78	Male	NA	36.8667	Dead	CR/PR	CTLA-4	NA	HiSeq 2500(Illumina)
MEL-IPI_Pat49-TP-NT-SM-4DK2A-SM-53U5W	10.1038/s41588-018-0200-2	36	Male	NA	34.4667	Dead	SD	CTLA-4	NA	HiSeq 2500(Illumina)
MEL-IPI_Pat50-TP-NT-SM-53U69-SM-53U5X	10.1038/s41588-018-0200-2	77	Male	NA	2.16667	Alive	PD	CTLA-4	NA	HiSeq 2500(Illumina)
MEL-IPI_Pat52-TP-NT-SM-4DK2D-SM-53U5Z	10.1038/s41588-018-0200-2	65	Male	NA	6.3	Alive	PD	CTLA-4	NA	HiSeq 2500(Illumina)
MEL-IPI_Pat54-TP-NB-SM-4DK2F-SM-4NFVL	10.1038/s41588-018-0200-2	73	Male	NA	6.93333	Alive	PD	CTLA-4	NA	HiSeq 2500(Illumina)
MEL-IPI_Pat56-TP-NB-SM-4DK2H-SM-4NFVN	10.1038/s41588-018-0200-2	68	Male	NA	7.83333	Alive	PD	CTLA-4	NA	HiSeq 2500(Illumina)
MEL-IPI_Pat57-TP-NB-SM-4DK2I-SM-4NFVO	10.1038/s41588-018-0200-2	69	Male	NA	8.33333	Alive	PD	CTLA-4	NA	HiSeq 2500(Illumina)
MEL-IPI_Pat59-TP-NB-SM-4DK2K-SM-4NFVQ	10.1038/s41588-018-0200-2	36	Male	NA	7.46667	Alive	PD	CTLA-4	NA	HiSeq 2500(Illumina)
MEL-IPI_Pat60-TP-NB-SM-4DK2L-SM-4NFVR	10.1038/s41588-018-0200-2	86	Male	NA	9.06667	Alive	PD	CTLA-4	NA	HiSeq 2500(Illumina)
MEL-IPI_Pat62-TP-NB-SM-4DK2N-SM-4NFVT	10.1038/s41588-018-0200-2	76	Male	NA	20.0667	Alive	PD	CTLA-4	NA	HiSeq 2500(Illumina)
MEL-IPI_Pat64-TP-NB-SM-4DK2P-SM-4NFVV	10.1038/s41588-018-0200-2	83	Male	NA	3.53333	Alive	PD	CTLA-4	NA	HiSeq 2500(Illumina)
MEL-IPI_Pat67-TP-NB-SM-4DK2S-SM-4NFVY	10.1038/s41588-018-0200-2	40	Male	NA	2.63333	Alive	PD	CTLA-4	NA	HiSeq 2500(Illumina)
MEL-IPI_Pat71-TP-NB-SM-4DK2W-SM-4NFW3	10.1038/s41588-018-0200-2	64	Male	NA	4.56667	Alive	PD	CTLA-4	NA	HiSeq 2500(Illumina)
MEL-IPI_Pat73-TP-NB-SM-4DK2Y-SM-4NFW5	10.1038/s41588-018-0200-2	71	Male	NA	14.7333	Alive	CR/PR	CTLA-4	NA	HiSeq 2500(Illumina)
MEL-IPI_Pat74-TP-NB-SM-4DK2Z-SM-4NFW6	10.1038/s41588-018-0200-2	73	Male	NA	6.43333	Alive	PD	CTLA-4	NA	HiSeq 2500(Illumina)
MEL-IPI_Pat76-TP-NB-SM-4DK32-SM-4NFW8	10.1038/s41588-018-0200-2	74	Male	NA	4.63333	Alive	PD	CTLA-4	NA	HiSeq 2500(Illumina)
MEL-IPI_Pat77-TP-NT-SM-4DK33-SM-53U63	10.1038/s41588-018-0200-2	22	Male	NA	34.3	Dead	CR/PR	CTLA-4	NA	HiSeq 2500(Illumina)
MEL-IPI_Pat79-TP-NB-SM-53U2S-SM-4NFWB	10.1038/s41588-018-0200-2	69	Male	NA	26.7	Alive	CR/PR	CTLA-4	NA	HiSeq 2500(Illumina)
MEL-IPI_Pat80-TP-NT-SM-4DK36-SM-53U53	10.1038/s41588-018-0200-2	47	Male	NA	24.1333	Alive	SD	CTLA-4	NA	HiSeq 2500(Illumina)
MEL-IPI_Pat83-TP-NT-SM-53U2W-SM-53U56	10.1038/s41588-018-0200-2	22	Male	NA	34.2333	Dead	PD	CTLA-4	NA	HiSeq 2500(Illumina)
MEL-IPI_Pat85-TP-NB-SM-53U2Y-SM-4NFWH	10.1038/s41588-018-0200-2	83	Male	NA	15.2667	Alive	PD	CTLA-4	NA	HiSeq 2500(Illumina)
MEL-IPI_Pat86-TP-NT-SM-4DK3C-SM-53U59	10.1038/s41588-018-0200-2	54	Male	NA	9.76667	Alive	SD	CTLA-4	NA	HiSeq 2500(Illumina)
MEL-IPI_Pat87-TP-NT-SM-4DK3D-SM-53U5A	10.1038/s41588-018-0200-2	47	Male	NA	36.4333	Dead	PD	CTLA-4	NA	HiSeq 2500(Illumina)
MEL-IPI_Pat90-TP-NB-SM-4DK3G-SM-4NFWM	10.1038/s41588-018-0200-2	59	Male	NA	33.5	Dead	CR/PR	CTLA-4	NA	HiSeq 2500(Illumina)
NR1867_T_N	10.1038/s41588-018-0200-2	NA	Male	NA	18.25	Dead	PD	CTLA-4	NA	HiSeq 2500(Illumina)
NR2137_T_N	10.1038/s41588-018-0200-2	NA	Male	NA	9.73333	Dead	PD	CTLA-4	NA	HiSeq 2500(Illumina)
NR3549_T_N	10.1038/s41588-018-0200-2	NA	Male	NA	6.08333	Dead	PD	CTLA-4	NA	HiSeq 2500(Illumina)
NR4018_T_N	10.1038/s41588-018-0200-2	NA	Male	NA	3.65	Dead	PD	CTLA-4	NA	HiSeq 2500(Illumina)
NR4045_T_N	10.1038/s41588-018-0200-2	NA	Male	NA	20.6833	Dead	PD	CTLA-4	NA	HiSeq 2500(Illumina)
NR4083_T_N	10.1038/s41588-018-0200-2	NA	Male	NA	2.8	Dead	PD	CTLA-4	NA	HiSeq 2500(Illumina)
NR4631_T_N	10.1038/s41588-018-0200-2	NA	Male	NA	6.08333	Dead	PD	CTLA-4	NA	HiSeq 2500(Illumina)
NR9445_T_N	10.1038/s41588-018-0200-2	NA	Male	NA	2.43333	Dead	PD	CTLA-4	NA	HiSeq 2500(Illumina)
NR9521_T_N	10.1038/s41588-018-0200-2	NA	Male	NA	32.85	Dead	PD	CTLA-4	NA	HiSeq 2500(Illumina)
PR12117_T_N	10.1038/s41588-018-0200-2	NA	Male	NA	19.4667	Alive	CR/PR	CTLA-4	NA	HiSeq 2500(Illumina)
PR4035_T_N	10.1038/s41588-018-0200-2	NA	Male	NA	51.1	Dead	CR/PR	CTLA-4	NA	HiSeq 2500(Illumina)
PR4046_T_N	10.1038/s41588-018-0200-2	NA	Male	NA	25.6667	Dead	CR/PR	CTLA-4	NA	HiSeq 2500(Illumina)
PR4077_T_N	10.1038/s41588-018-0200-2	NA	Male	NA	74.2167	Dead	CR/PR	CTLA-4	NA	HiSeq 2500(Illumina)
SD1494_T_N	10.1038/s41588-018-0200-2	NA	Male	NA	24.3333	Dead	SD	CTLA-4	NA	HiSeq 2500(Illumina)
SD5038_T_N	10.1038/s41588-018-0200-2	NA	Male	NA	14.6	Alive	SD	CTLA-4	NA	HiSeq 2500(Illumina)
SD5934_T_N	10.1038/s41588-018-0200-2	NA	Male	NA	19.4667	Alive	SD	CTLA-4	NA	HiSeq 2500(Illumina)
SD6336_T_N	10.1038/s41588-018-0200-2	NA	Male	NA	84.2333	Dead	SD	CTLA-4	NA	HiSeq 2500(Illumina)
pt211	10.1016/j.cell.2017.09.028	NA	NA	NA	38.1333	Alive	CR/PR	PD-1/PD-L1	Nivolumab	HiSeq 2000/2500(Illumina)
pt212	10.1016/j.cell.2017.09.028	NA	NA	M1b	21.1	Dead	SD	PD-1/PD-L1	Nivolumab	HiSeq 2000/2500(Illumina)
pt213	10.1016/j.cell.2017.09.028	NA	NA	M1c	7.4	Dead	PD	PD-1/PD-L1	Nivolumab	HiSeq 2000/2500(Illumina)
pt215	10.1016/j.cell.2017.09.028	NA	NA	M1c	38.3	Alive	CR/PR	PD-1/PD-L1	Nivolumab	HiSeq 2000/2500(Illumina)
pt216	10.1016/j.cell.2017.09.028	NA	NA	M0	8.63333	Dead	PD	PD-1/PD-L1	Nivolumab	HiSeq 2000/2500(Illumina)
pt217	10.1016/j.cell.2017.09.028	NA	NA	M1c	3.06667	Dead	PD	PD-1/PD-L1	Nivolumab	HiSeq 2000/2500(Illumina)
pt218	10.1016/j.cell.2017.09.028	NA	NA	M1a	8.53333	Dead	SD	PD-1/PD-L1	Nivolumab	HiSeq 2000/2500(Illumina)
pt219	10.1016/j.cell.2017.09.028	NA	NA	NA	27.9	Dead	PD	PD-1/PD-L1	Nivolumab	HiSeq 2000/2500(Illumina)
pt221	10.1016/j.cell.2017.09.028	NA	NA	NA	9.33333	Dead	PD	PD-1/PD-L1	Nivolumab	HiSeq 2000/2500(Illumina)
pt225	10.1016/j.cell.2017.09.028	NA	NA	M1c	1.9	Dead	PD	CTLA-4 plus PD-1/PD-L1	Ipilimumab+Nivolumab	HiSeq 2000/2500(Illumina)
pt226	10.1016/j.cell.2017.09.028	NA	NA	M1a	35.7667	Alive	CR/PR	PD-1/PD-L1	Nivolumab	HiSeq 2000/2500(Illumina)
pt231	10.1016/j.cell.2017.09.028	NA	NA	M1c	1.73333	Dead	SD	PD-1/PD-L1	Nivolumab	HiSeq 2000/2500(Illumina)
pt232	10.1016/j.cell.2017.09.028	NA	NA	M1c	4.96667	Alive	PD	PD-1/PD-L1	Nivolumab	HiSeq 2000/2500(Illumina)
pt233	10.1016/j.cell.2017.09.028	NA	NA	M1c	3.36667	Dead	PD	PD-1/PD-L1	Nivolumab	HiSeq 2000/2500(Illumina)
pt234	10.1016/j.cell.2017.09.028	NA	NA	M1b	31.7333	Alive	SD	PD-1/PD-L1	Nivolumab	HiSeq 2000/2500(Illumina)
pt235	10.1016/j.cell.2017.09.028	NA	NA	M1c	15.8333	Dead	PD	PD-1/PD-L1	Nivolumab	HiSeq 2000/2500(Illumina)
pt236	10.1016/j.cell.2017.09.028	NA	NA	NA	24.6667	Dead	PD	PD-1/PD-L1	Nivolumab	HiSeq 2000/2500(Illumina)
pt237	10.1016/j.cell.2017.09.028	NA	NA	M1c	9.1	Dead	PD	PD-1/PD-L1	Nivolumab	HiSeq 2000/2500(Illumina)
pt238	10.1016/j.cell.2017.09.028	NA	NA	M1a	35.1	Alive	CR/PR	PD-1/PD-L1	Nivolumab	HiSeq 2000/2500(Illumina)
pt239	10.1016/j.cell.2017.09.028	NA	NA	M1a	32.0333	Alive	PD	PD-1/PD-L1	Nivolumab	HiSeq 2000/2500(Illumina)
pt240	10.1016/j.cell.2017.09.028	NA	NA	M1c	3.8	Alive	PD	CTLA-4 plus PD-1/PD-L1	Ipilimumab+Nivolumab	HiSeq 2000/2500(Illumina)
pt242	10.1016/j.cell.2017.09.028	NA	NA	M1b	27.8	Alive	CR/PR	CTLA-4 plus PD-1/PD-L1	Ipilimumab+Nivolumab	HiSeq 2000/2500(Illumina)
pt244	10.1016/j.cell.2017.09.028	NA	NA	M1c	36.0333	Alive	SD	CTLA-4 plus PD-1/PD-L1	Ipilimumab+Nivolumab	HiSeq 2000/2500(Illumina)
pt245	10.1016/j.cell.2017.09.028	NA	NA	M1a	21.5333	Dead	SD	CTLA-4 plus PD-1/PD-L1	Ipilimumab+Nivolumab	HiSeq 2000/2500(Illumina)
pt246	10.1016/j.cell.2017.09.028	NA	NA	M1c	5.56667	Dead	SD	CTLA-4 plus PD-1/PD-L1	Ipilimumab+Nivolumab	HiSeq 2000/2500(Illumina)
pt252	10.1016/j.cell.2017.09.028	NA	NA	NA	36.4333	Alive	CR/PR	PD-1/PD-L1	Nivolumab	HiSeq 2000/2500(Illumina)
pt254	10.1016/j.cell.2017.09.028	NA	NA	M1a	7.56667	Dead	PD	CTLA-4 plus PD-1/PD-L1	Ipilimumab+Nivolumab	HiSeq 2000/2500(Illumina)
pt255	10.1016/j.cell.2017.09.028	NA	NA	M1b	23.9333	Dead	PD	CTLA-4 plus PD-1/PD-L1	Ipilimumab+Nivolumab	HiSeq 2000/2500(Illumina)
pt256	10.1016/j.cell.2017.09.028	NA	NA	M1c	34.8667	Alive	CR/PR	CTLA-4 plus PD-1/PD-L1	Ipilimumab+Nivolumab	HiSeq 2000/2500(Illumina)
pt257	10.1016/j.cell.2017.09.028	NA	NA	NA	27.5667	Alive	CR/PR	CTLA-4 plus PD-1/PD-L1	Ipilimumab+Nivolumab	HiSeq 2000/2500(Illumina)
pt259	10.1016/j.cell.2017.09.028	NA	NA	M1a	1.9	Alive	PD	CTLA-4 plus PD-1/PD-L1	Ipilimumab+Nivolumab	HiSeq 2000/2500(Illumina)
pt260	10.1016/j.cell.2017.09.028	NA	NA	M1c	15.8667	Dead	PD	CTLA-4 plus PD-1/PD-L1	Ipilimumab+Nivolumab	HiSeq 2000/2500(Illumina)
pt261	10.1016/j.cell.2017.09.028	NA	NA	M1c	14.4333	Dead	CR/PR	CTLA-4 plus PD-1/PD-L1	Ipilimumab+Nivolumab	HiSeq 2000/2500(Illumina)
pt262	10.1016/j.cell.2017.09.028	NA	NA	NA	28.8333	Alive	CR/PR	CTLA-4 plus PD-1/PD-L1	Ipilimumab+Nivolumab	HiSeq 2000/2500(Illumina)
pt266	10.1016/j.cell.2017.09.028	NA	NA	M1c	16.6333	Dead	SD	CTLA-4 plus PD-1/PD-L1	Ipilimumab+Nivolumab	HiSeq 2000/2500(Illumina)
pt267	10.1016/j.cell.2017.09.028	NA	NA	M1a	23.6	Dead	SD	PD-1/PD-L1	Nivolumab	HiSeq 2000/2500(Illumina)
pt268	10.1016/j.cell.2017.09.028	NA	NA	M1a	24.6	Alive	PD	PD-1/PD-L1	Nivolumab	HiSeq 2000/2500(Illumina)
pt273	10.1016/j.cell.2017.09.028	NA	NA	M1b	23.0667	Alive	SD	CTLA-4 plus PD-1/PD-L1	Ipilimumab+Nivolumab	HiSeq 2000/2500(Illumina)
pt274	10.1016/j.cell.2017.09.028	NA	NA	NA	18.0667	Dead	PD	PD-1/PD-L1	Nivolumab	HiSeq 2000/2500(Illumina)
pt275	10.1016/j.cell.2017.09.028	NA	NA	M1c	34.4	Alive	SD	CTLA-4 plus PD-1/PD-L1	Ipilimumab+Nivolumab	HiSeq 2000/2500(Illumina)
pt276	10.1016/j.cell.2017.09.028	NA	NA	M1b	28.0667	Alive	CR/PR	CTLA-4 plus PD-1/PD-L1	Ipilimumab+Nivolumab	HiSeq 2000/2500(Illumina)
pt278	10.1016/j.cell.2017.09.028	NA	NA	M1c	10.3667	Dead	SD	CTLA-4 plus PD-1/PD-L1	Ipilimumab+Nivolumab	HiSeq 2000/2500(Illumina)
pt279	10.1016/j.cell.2017.09.028	NA	NA	M1c	8.2	Alive	SD	PD-1/PD-L1	Nivolumab	HiSeq 2000/2500(Illumina)
pt280	10.1016/j.cell.2017.09.028	NA	NA	M1b	25.6667	Dead	CR/PR	PD-1/PD-L1	Nivolumab	HiSeq 2000/2500(Illumina)
pt281	10.1016/j.cell.2017.09.028	NA	NA	M1c	9.36667	Alive	SD	PD-1/PD-L1	Nivolumab	HiSeq 2000/2500(Illumina)
pt282	10.1016/j.cell.2017.09.028	NA	NA	M1c	0.666667	Dead	SD	PD-1/PD-L1	Nivolumab	HiSeq 2000/2500(Illumina)
pt284	10.1016/j.cell.2017.09.028	NA	NA	M1c	0.333333	Dead	SD	PD-1/PD-L1	Nivolumab	HiSeq 2000/2500(Illumina)
pt285	10.1016/j.cell.2017.09.028	NA	NA	M1a	15.7	Dead	SD	PD-1/PD-L1	Nivolumab	HiSeq 2000/2500(Illumina)
pt287	10.1016/j.cell.2017.09.028	NA	NA	NA	7.26667	Dead	SD	CTLA-4 plus PD-1/PD-L1	Ipilimumab+Nivolumab	HiSeq 2000/2500(Illumina)
pt290	10.1016/j.cell.2017.09.028	NA	NA	M1c	14.3	Dead	SD	CTLA-4 plus PD-1/PD-L1	Ipilimumab+Nivolumab	HiSeq 2000/2500(Illumina)
pt291	10.1016/j.cell.2017.09.028	NA	NA	M1c	15.4	Alive	SD	CTLA-4 plus PD-1/PD-L1	Ipilimumab+Nivolumab	HiSeq 2000/2500(Illumina)
pt292	10.1016/j.cell.2017.09.028	NA	NA	M1c	5.03333	Dead	PD	PD-1/PD-L1	Nivolumab	HiSeq 2000/2500(Illumina)
pt293	10.1016/j.cell.2017.09.028	NA	NA	M1a	30.1333	Alive	PD	CTLA-4 plus PD-1/PD-L1	Ipilimumab+Nivolumab	HiSeq 2000/2500(Illumina)
pt294	10.1016/j.cell.2017.09.028	NA	NA	M1c	9.06667	Dead	PD	CTLA-4 plus PD-1/PD-L1	Ipilimumab+Nivolumab	HiSeq 2000/2500(Illumina)
pt295	10.1016/j.cell.2017.09.028	NA	NA	NA	32.4667	Alive	SD	PD-1/PD-L1	Nivolumab	HiSeq 2000/2500(Illumina)
pt297	10.1016/j.cell.2017.09.028	NA	NA	M1a	28.1333	Dead	SD	PD-1/PD-L1	Nivolumab	HiSeq 2000/2500(Illumina)
pt298	10.1016/j.cell.2017.09.028	NA	NA	M1c	5.8	Dead	PD	CTLA-4 plus PD-1/PD-L1	Ipilimumab+Nivolumab	HiSeq 2000/2500(Illumina)
pt300	10.1016/j.cell.2017.09.028	NA	NA	NA	11.1	Dead	SD	CTLA-4 plus PD-1/PD-L1	Ipilimumab+Nivolumab	HiSeq 2000/2500(Illumina)
pt301	10.1016/j.cell.2017.09.028	NA	NA	M1c	28.3	Alive	PD	CTLA-4 plus PD-1/PD-L1	Ipilimumab+Nivolumab	HiSeq 2000/2500(Illumina)
pt302	10.1016/j.cell.2017.09.028	NA	NA	M1c	32.7	Alive	CR/PR	PD-1/PD-L1	Nivolumab	HiSeq 2000/2500(Illumina)
pt306	10.1016/j.cell.2017.09.028	NA	NA	M1c	24.9	Dead	SD	CTLA-4 plus PD-1/PD-L1	Ipilimumab+Nivolumab	HiSeq 2000/2500(Illumina)
pt308	10.1016/j.cell.2017.09.028	NA	NA	M1c	28	Dead	PD	CTLA-4 plus PD-1/PD-L1	Ipilimumab+Nivolumab	HiSeq 2000/2500(Illumina)
pt309	10.1016/j.cell.2017.09.028	NA	NA	M1a	27.8	Alive	CR/PR	CTLA-4 plus PD-1/PD-L1	Ipilimumab+Nivolumab	HiSeq 2000/2500(Illumina)
pt310	10.1016/j.cell.2017.09.028	NA	NA	NA	21.2	Alive	SD	PD-1/PD-L1	Nivolumab	HiSeq 2000/2500(Illumina)
pt311	10.1016/j.cell.2017.09.028	NA	NA	M1b	16.1333	Alive	PD	CTLA-4 plus PD-1/PD-L1	Ipilimumab+Nivolumab	HiSeq 2000/2500(Illumina)
pt312	10.1016/j.cell.2017.09.028	NA	NA	NA	27.2667	Alive	CR/PR	CTLA-4 plus PD-1/PD-L1	Ipilimumab+Nivolumab	HiSeq 2000/2500(Illumina)
pt314	10.1016/j.cell.2017.09.028	NA	NA	M1c	3.03333	Dead	PD	CTLA-4 plus PD-1/PD-L1	Ipilimumab+Nivolumab	HiSeq 2000/2500(Illumina)
pt316	10.1016/j.cell.2017.09.028	NA	NA	M1b	30.4333	Alive	SD	CTLA-4 plus PD-1/PD-L1	Ipilimumab+Nivolumab	HiSeq 2000/2500(Illumina)

## Sheet: Table S2
	Table S2 Clinical characteristics of 109 pooled NSCLC patients treated with ICI agents
Unique Subject Identifier	Sample ID	DOI	Age	Sex	Smoking status	Histology	PD-L1 expression	PFS (months)	PFS status	Response	Therapy target	Therapy drug	Sequencing platform
CA209012-13-156	1	10.1016/j.ccell.2018.03.018	70	Female	Former	LUSC	Weak	1.4127	Progressive	PD	PD-1 plus CTLA-4	Nivolumab+Ipilimumab	HiSeq 2000/2500/4000(Illumina)
CA209012-13-166	2	10.1016/j.ccell.2018.03.018	72	Male	Former	LUSC	Strong	6.8008	Progressive	PR	PD-1 plus CTLA-4	Nivolumab+Ipilimumab	HiSeq 2000/2500/4000(Illumina)
CA209012-13-170	3	10.1016/j.ccell.2018.03.018	61	Female	Never	LUSC	Strong	1.4784	Non-progressive	SD	PD-1 plus CTLA-4	Nivolumab+Ipilimumab	HiSeq 2000/2500/4000(Illumina)
CA209012-10-182	4	10.1016/j.ccell.2018.03.018	64	Male	current	LUSC	Weak	3.7782	Progressive	SD	PD-1 plus CTLA-4	Nivolumab+Ipilimumab	HiSeq 2000/2500/4000(Illumina)
CA209012-10-187	5	10.1016/j.ccell.2018.03.018	57	Male	Never	LUSC	Negative	7.5565	Progressive	SD	PD-1 plus CTLA-4	Nivolumab+Ipilimumab	HiSeq 2000/2500/4000(Illumina)
CA209012-13-195	6	10.1016/j.ccell.2018.03.018	67	Female	Former	LUSC	Negative	3.7125	Progressive	SD	PD-1 plus CTLA-4	Nivolumab+Ipilimumab	HiSeq 2000/2500/4000(Illumina)
CA209012-10-200	7	10.1016/j.ccell.2018.03.018	56	Male	Former	LUSC	Weak	38.6037	Non-progressive	PR	PD-1 plus CTLA-4	Nivolumab+Ipilimumab	HiSeq 2000/2500/4000(Illumina)
CA209012-10-211	8	10.1016/j.ccell.2018.03.018	58	Male	Former	LUSC	Strong	2.9897	Progressive	SD	PD-1 plus CTLA-4	Nivolumab+Ipilimumab	HiSeq 2000/2500/4000(Illumina)
CA209012-10-219	9	10.1016/j.ccell.2018.03.018	68	Female	Former	LUSC	Weak	7.7536	Progressive	SD	PD-1 plus CTLA-4	Nivolumab+Ipilimumab	HiSeq 2000/2500/4000(Illumina)
CA209012-13-234	10	10.1016/j.ccell.2018.03.018	72	Male	Former	LUSC	Weak	5.4209	Progressive	SD	PD-1 plus CTLA-4	Nivolumab+Ipilimumab	HiSeq 2000/2500/4000(Illumina)
CA209012-10-238	11	10.1016/j.ccell.2018.03.018	58	Female	Never	LUSC	Negative	7.8193	Progressive	SD	PD-1 plus CTLA-4	Nivolumab+Ipilimumab	HiSeq 2000/2500/4000(Illumina)
CA209012-10-239	12	10.1016/j.ccell.2018.03.018	82	Male	Former	LUSC	Weak	26.152	Non-progressive	PR	PD-1 plus CTLA-4	Nivolumab+Ipilimumab	HiSeq 2000/2500/4000(Illumina)
CA209012-10-252	13	10.1016/j.ccell.2018.03.018	76	Male	Never	LUSC	Unknown	23.9507	Progressive	SD	PD-1 plus CTLA-4	Nivolumab+Ipilimumab	HiSeq 2000/2500/4000(Illumina)
CA209012-13-260	14	10.1016/j.ccell.2018.03.018	43	Female	Former	LUSC	Weak	1.6756	Progressive	PD	PD-1 plus CTLA-4	Nivolumab+Ipilimumab	HiSeq 2000/2500/4000(Illumina)
CA209012-13-273	15	10.1016/j.ccell.2018.03.018	53	Female	current	LUSC	Negative	0.0329	Non-progressive	PD	PD-1 plus CTLA-4	Nivolumab+Ipilimumab	HiSeq 2000/2500/4000(Illumina)
CA209012-10-275	16	10.1016/j.ccell.2018.03.018	67	Male	Never	LUSC	Negative	3.6468	Progressive	SD	PD-1 plus CTLA-4	Nivolumab+Ipilimumab	HiSeq 2000/2500/4000(Illumina)
CA209012-10-285	17	10.1016/j.ccell.2018.03.018	68	Female	Never	LUSC	Strong	12.0903	Progressive	SD	PD-1 plus CTLA-4	Nivolumab+Ipilimumab	HiSeq 2000/2500/4000(Illumina)
CA209012-13-293	18	10.1016/j.ccell.2018.03.018	69	Female	Former	LUSC	Weak	29.7331	Non-progressive	PR	PD-1 plus CTLA-4	Nivolumab+Ipilimumab	HiSeq 2000/2500/4000(Illumina)
CA209012-13-296	19	10.1016/j.ccell.2018.03.018	59	Male	Former	LUSC	Weak	28.7803	Non-progressive	PR	PD-1 plus CTLA-4	Nivolumab+Ipilimumab	HiSeq 2000/2500/4000(Illumina)
CA209012-10-324	20	10.1016/j.ccell.2018.03.018	54	Male	current	LUSC	Weak	1.4456	Progressive	PD	PD-1 plus CTLA-4	Nivolumab+Ipilimumab	HiSeq 2000/2500/4000(Illumina)
CA209012-10-345	21	10.1016/j.ccell.2018.03.018	74	Female	Former	LUSC	Weak	21.5852	Non-progressive	CR	PD-1 plus CTLA-4	Nivolumab+Ipilimumab	HiSeq 2000/2500/4000(Illumina)
CA209012-10-346	22	10.1016/j.ccell.2018.03.018	72	Male	Former	LUSC	Negative	2.4969	Progressive	PD	PD-1 plus CTLA-4	Nivolumab+Ipilimumab	HiSeq 2000/2500/4000(Illumina)
CA209012-10-347	23	10.1016/j.ccell.2018.03.018	75	Female	Former	LUSC	Weak	7.9836	Progressive	PR	PD-1 plus CTLA-4	Nivolumab+Ipilimumab	HiSeq 2000/2500/4000(Illumina)
CA209012-10-352	24	10.1016/j.ccell.2018.03.018	85	Female	Former	LUSC	Negative	2.2669	Progressive	PD	PD-1 plus CTLA-4	Nivolumab+Ipilimumab	HiSeq 2000/2500/4000(Illumina)
CA209012-10-353	25	10.1016/j.ccell.2018.03.018	65	Male	Former	LUSC	Weak	22.1437	Progressive	SD	PD-1 plus CTLA-4	Nivolumab+Ipilimumab	HiSeq 2000/2500/4000(Illumina)
CA209012-13-358	26	10.1016/j.ccell.2018.03.018	60	Female	current	LUSC	Weak	23	Non-progressive	PR	PD-1 plus CTLA-4	Nivolumab+Ipilimumab	HiSeq 2000/2500/4000(Illumina)
CA209012-10-361	27	10.1016/j.ccell.2018.03.018	55	Male	current	LUSC	Unknown	4.1068	Progressive	SD	PD-1 plus CTLA-4	Nivolumab+Ipilimumab	HiSeq 2000/2500/4000(Illumina)
CA209012-13-375	28	10.1016/j.ccell.2018.03.018	77	Female	Former	LUSC	Strong	17.0513	Progressive	SD	PD-1 plus CTLA-4	Nivolumab+Ipilimumab	HiSeq 2000/2500/4000(Illumina)
CA209012-10-381	29	10.1016/j.ccell.2018.03.018	50	Female	current	LUSC	Negative	2.5955	Progressive	PD	PD-1 plus CTLA-4	Nivolumab+Ipilimumab	HiSeq 2000/2500/4000(Illumina)
CA209012-13-389	30	10.1016/j.ccell.2018.03.018	75	Male	Former	LUSC	Weak	21.191	Non-progressive	PR	PD-1 plus CTLA-4	Nivolumab+Ipilimumab	HiSeq 2000/2500/4000(Illumina)
CA209012-13-392	31	10.1016/j.ccell.2018.03.018	67	Female	current	LUSC	Weak	2.3326	Progressive	PD	PD-1 plus CTLA-4	Nivolumab+Ipilimumab	HiSeq 2000/2500/4000(Illumina)
CA209012-10-395	32	10.1016/j.ccell.2018.03.018	50	Female	Former	LUSC	Strong	18.9897	Non-progressive	CR	PD-1 plus CTLA-4	Nivolumab+Ipilimumab	HiSeq 2000/2500/4000(Illumina)
CA209012-16-401	33	10.1016/j.ccell.2018.03.018	74	Male	Former	LUSC	Negative	21.6181	Non-progressive	PR	PD-1 plus CTLA-4	Nivolumab+Ipilimumab	HiSeq 2000/2500/4000(Illumina)
CA209012-13-410	34	10.1016/j.ccell.2018.03.018	76	Male	Former	LUSC	Strong	22.34	Non-progressive	PR	PD-1 plus CTLA-4	Nivolumab+Ipilimumab	HiSeq 2000/2500/4000(Illumina)
CA209012-13-414	35	10.1016/j.ccell.2018.03.018	66	Female	Former	LUSC	Unknown	2.3326	Progressive	PD	PD-1 plus CTLA-4	Nivolumab+Ipilimumab	HiSeq 2000/2500/4000(Illumina)
CA209012-16-418	36	10.1016/j.ccell.2018.03.018	62	Female	Former	LUSC	Negative	13.3388	Progressive	SD	PD-1 plus CTLA-4	Nivolumab+Ipilimumab	HiSeq 2000/2500/4000(Illumina)
CA209012-10-424	37	10.1016/j.ccell.2018.03.018	57	Female	Former	LUSC	Strong	19.0226	Non-progressive	PR	PD-1 plus CTLA-4	Nivolumab+Ipilimumab	HiSeq 2000/2500/4000(Illumina)
CA209012-10-429	38	10.1016/j.ccell.2018.03.018	66	Male	Former	LUSC	Unknown	7.8193	Progressive	PR	PD-1 plus CTLA-4	Nivolumab+Ipilimumab	HiSeq 2000/2500/4000(Illumina)
CA209012-13-436	39	10.1016/j.ccell.2018.03.018	68	Female	Never	LUSC	Weak	0.03	Non-progressive	NE	PD-1 plus CTLA-4	Nivolumab+Ipilimumab	HiSeq 2000/2500/4000(Illumina)
CA209012-10-437	40	10.1016/j.ccell.2018.03.018	73	Male	Former	LUSC	Weak	8.115	Progressive	PR	PD-1 plus CTLA-4	Nivolumab+Ipilimumab	HiSeq 2000/2500/4000(Illumina)
CA209012-10-445	41	10.1016/j.ccell.2018.03.018	53	Male	Former	LUSC	Negative	13.5359	Non-progressive	CR	PD-1 plus CTLA-4	Nivolumab+Ipilimumab	HiSeq 2000/2500/4000(Illumina)
CA209012-10-446	42	10.1016/j.ccell.2018.03.018	59	Male	Former	LUSC	Weak	3.9425	Progressive	SD	PD-1 plus CTLA-4	Nivolumab+Ipilimumab	HiSeq 2000/2500/4000(Illumina)
CA209012-10-468	43	10.1016/j.ccell.2018.03.018	58	Female	Former	LUSC	Negative	5.0924	Progressive	SD	PD-1 plus CTLA-4	Nivolumab+Ipilimumab	HiSeq 2000/2500/4000(Illumina)
CA209012-13-212	44	10.1016/j.ccell.2018.03.018	63	Male	Former	LUSC	Weak	0.3285	Progressive	NE	PD-1 plus CTLA-4	Nivolumab+Ipilimumab	HiSeq 2000/2500/4000(Illumina)
CA209012-13-218	45	10.1016/j.ccell.2018.03.018	56	Male	Never	LUSC	Weak	2.2341	Progressive	NE	PD-1 plus CTLA-4	Nivolumab+Ipilimumab	HiSeq 2000/2500/4000(Illumina)
CA209012-14-228	46	10.1016/j.ccell.2018.03.018	69	Male	Former	LUSC	Strong	3.3183	Progressive	SD	PD-1 plus CTLA-4	Nivolumab+Ipilimumab	HiSeq 2000/2500/4000(Illumina)
CA209012-14-231	47	10.1016/j.ccell.2018.03.018	66	Male	Former	LUSC	Weak	2.1027	Progressive	PD	PD-1 plus CTLA-4	Nivolumab+Ipilimumab	HiSeq 2000/2500/4000(Illumina)
CA209012-13-235	48	10.1016/j.ccell.2018.03.018	51	Male	Never	LUSC	Negative	2.2998	Non-progressive	SD	PD-1 plus CTLA-4	Nivolumab+Ipilimumab	HiSeq 2000/2500/4000(Illumina)
CA209012-10-240	49	10.1016/j.ccell.2018.03.018	55	Female	Never	LUSC	Negative	11.6632	Progressive	SD	PD-1 plus CTLA-4	Nivolumab+Ipilimumab	HiSeq 2000/2500/4000(Illumina)
CA209012-13-244	50	10.1016/j.ccell.2018.03.018	63	Male	Former	LUSC	Negative	10.6119	Progressive	SD	PD-1 plus CTLA-4	Nivolumab+Ipilimumab	HiSeq 2000/2500/4000(Illumina)
CA209012-13-247	51	10.1016/j.ccell.2018.03.018	56	Female	Former	LUSC	Negative	29.9302	Non-progressive	PR	PD-1 plus CTLA-4	Nivolumab+Ipilimumab	HiSeq 2000/2500/4000(Illumina)
CA209012-4-254	52	10.1016/j.ccell.2018.03.018	67	Male	Former	LUSC	Negative	30.3244	Non-progressive	PR	PD-1 plus CTLA-4	Nivolumab+Ipilimumab	HiSeq 2000/2500/4000(Illumina)
CA209012-10-256	53	10.1016/j.ccell.2018.03.018	46	Female	Former	LUSC	Weak	1.3799	Progressive	PD	PD-1 plus CTLA-4	Nivolumab+Ipilimumab	HiSeq 2000/2500/4000(Illumina)
CA209012-16-281	54	10.1016/j.ccell.2018.03.018	42	Female	current	LUSC	Negative	5.1581	Progressive	SD	PD-1 plus CTLA-4	Nivolumab+Ipilimumab	HiSeq 2000/2500/4000(Illumina)
CA209012-16-286	55	10.1016/j.ccell.2018.03.018	71	Male	Former	LUSC	Negative	2.1027	Progressive	PD	PD-1 plus CTLA-4	Nivolumab+Ipilimumab	HiSeq 2000/2500/4000(Illumina)
CA209012-5-300	56	10.1016/j.ccell.2018.03.018	63	Female	Former	LUSC	Negative	6.5051	Progressive	SD	PD-1 plus CTLA-4	Nivolumab+Ipilimumab	HiSeq 2000/2500/4000(Illumina)
CA209012-8-316	57	10.1016/j.ccell.2018.03.018	61	Female	Former	LUSC	Negative	2.037	Progressive	PD	PD-1 plus CTLA-4	Nivolumab+Ipilimumab	HiSeq 2000/2500/4000(Illumina)
CA209012-10-325	58	10.1016/j.ccell.2018.03.018	56	Female	Never	LUSC	Weak	1.8727	Progressive	NE	PD-1 plus CTLA-4	Nivolumab+Ipilimumab	HiSeq 2000/2500/4000(Illumina)
CA209012-13-327	59	10.1016/j.ccell.2018.03.018	56	Female	Never	LUSC	Weak	2.3326	Progressive	PD	PD-1 plus CTLA-4	Nivolumab+Ipilimumab	HiSeq 2000/2500/4000(Illumina)
CA209012-14-329	60	10.1016/j.ccell.2018.03.018	73	Female	Former	LUSC	Weak	24.3121	Non-progressive	PR	PD-1 plus CTLA-4	Nivolumab+Ipilimumab	HiSeq 2000/2500/4000(Illumina)
CA209012-13-354	61	10.1016/j.ccell.2018.03.018	72	Male	Former	LUSC	Negative	1.7084	Progressive	NE	PD-1 plus CTLA-4	Nivolumab+Ipilimumab	HiSeq 2000/2500/4000(Illumina)
CA209012-13-370	62	10.1016/j.ccell.2018.03.018	87	Male	Never	LUSC	Weak	22.9979	Progressive	PR	PD-1 plus CTLA-4	Nivolumab+Ipilimumab	HiSeq 2000/2500/4000(Illumina)
CA209012-14-374	63	10.1016/j.ccell.2018.03.018	75	Male	Former	LUSC	Strong	21.8809	Non-progressive	PR	PD-1 plus CTLA-4	Nivolumab+Ipilimumab	HiSeq 2000/2500/4000(Illumina)
CA209012-13-380	64	10.1016/j.ccell.2018.03.018	74	Female	current	LUSC	Weak	20.0411	Non-progressive	PR	PD-1 plus CTLA-4	Nivolumab+Ipilimumab	HiSeq 2000/2500/4000(Illumina)
CA209012-10-384	65	10.1016/j.ccell.2018.03.018	69	Female	Never	LUSC	Negative	4.7639	Non-progressive	SD	PD-1 plus CTLA-4	Nivolumab+Ipilimumab	HiSeq 2000/2500/4000(Illumina)
CA209012-10-396	66	10.1016/j.ccell.2018.03.018	76	Male	Former	LUSC	Negative	0.0329	Non-progressive	NE	PD-1 plus CTLA-4	Nivolumab+Ipilimumab	HiSeq 2000/2500/4000(Illumina)
CA209012-13-399	67	10.1016/j.ccell.2018.03.018	71	Female	Former	LUSC	Weak	2.5298	Progressive	PD	PD-1 plus CTLA-4	Nivolumab+Ipilimumab	HiSeq 2000/2500/4000(Illumina)
CA209012-1-439	68	10.1016/j.ccell.2018.03.018	61	Male	Former	LUSC	Weak	7.9507	Progressive	SD	PD-1 plus CTLA-4	Nivolumab+Ipilimumab	HiSeq 2000/2500/4000(Illumina)
CA209012-13-442	69	10.1016/j.ccell.2018.03.018	67	Female	Former	LUSC	Weak	2.6283	Progressive	PD	PD-1 plus CTLA-4	Nivolumab+Ipilimumab	HiSeq 2000/2500/4000(Illumina)
CA209012-10-444	70	10.1016/j.ccell.2018.03.018	83	Male	Former	LUSC	Unknown	1.2813	Progressive	NE	PD-1 plus CTLA-4	Nivolumab+Ipilimumab	HiSeq 2000/2500/4000(Illumina)
CA209012-14-447	71	10.1016/j.ccell.2018.03.018	71	Female	Former	LUSC	Weak	3.5154	Progressive	SD	PD-1 plus CTLA-4	Nivolumab+Ipilimumab	HiSeq 2000/2500/4000(Illumina)
CA209012-1-454	72	10.1016/j.ccell.2018.03.018	47	Male	Never	LUSC	Weak	2.2998	Progressive	PD	PD-1 plus CTLA-4	Nivolumab+Ipilimumab	HiSeq 2000/2500/4000(Illumina)
CA209012-4-463	73	10.1016/j.ccell.2018.03.018	57	Female	Former	LUSC	Weak	16.46	Non-progressive	PR	PD-1 plus CTLA-4	Nivolumab+Ipilimumab	HiSeq 2000/2500/4000(Illumina)
CA209012-1-467	74	10.1016/j.ccell.2018.03.018	42	Male	Former	LUSC	Weak	7.9836	Progressive	SD	PD-1 plus CTLA-4	Nivolumab+Ipilimumab	HiSeq 2000/2500/4000(Illumina)
CA209012-14-472	75	10.1016/j.ccell.2018.03.018	51	Female	Former	LUSC	Negative	14.883	Non-progressive	CR	PD-1 plus CTLA-4	Nivolumab+Ipilimumab	HiSeq 2000/2500/4000(Illumina)
	AL4602	10.1126/science.aaa1348	59	Male	Former	LUAD	Strong	8.36667	Non-progressive	SD	PD-1	Pembrolizumab	HiSeq 2000(Illumina)
	AU5884	10.1126/science.aaa1348	64	Male	Former	LUAD	Weak	1.83333	Progressive	PD	PD-1	Pembrolizumab	HiSeq 2000(Illumina)
	BL3403	10.1126/science.aaa1348	73	Female	Former	LUAD	Weak	6.5	Progressive	SD	PD-1	Pembrolizumab	HiSeq 2000(Illumina)
	CA9903	10.1126/science.aaa1348	57	Male	Former	LUAD	Strong	14.5	Progressive	PR	PD-1	Pembrolizumab	HiSeq 2000(Illumina)
	CU9061	10.1126/science.aaa1348	57	Male	Former	LUSC	Weak	3.96667	Non-progressive	SD	PD-1	Pembrolizumab	HiSeq 2000(Illumina)
	DI6359	10.1126/science.aaa1348	61	Female	Current	LUAD	Strong	9.8	Non-progressive	PR	PD-1	Pembrolizumab	HiSeq 2000(Illumina)
	DM123062	10.1126/science.aaa1348	50	Male	Never	LUAD	Weak	1.9	Progressive	PD	PD-1	Pembrolizumab	HiSeq 2000(Illumina)
	FR9547	10.1126/science.aaa1348	65	Female	Current	LUAD	Strong	4.2	Non-progressive	PR	PD-1	Pembrolizumab	HiSeq 2000(Illumina)
	GR0134	10.1126/science.aaa1348	80	Male	Former	LUAD	Negative	8.3	Progressive	PR	PD-1	Pembrolizumab	HiSeq 2000(Illumina)
	GR4788	10.1126/science.aaa1348	59	Male	Current	LUSC	Negative	1.86667	Progressive	PD	PD-1	Pembrolizumab	HiSeq 2000(Illumina)
	HE3202	10.1126/science.aaa1348	63	Female	Former	LUAD	Strong	14.6667	Non-progressive	PR	PD-1	Pembrolizumab	HiSeq 2000(Illumina)
	JB112852	10.1126/science.aaa1348	60	Male	Never	LUAD	Negative	3.26667	Progressive	PD	PD-1	Pembrolizumab	HiSeq 2000(Illumina)
	KA3947	10.1126/science.aaa1348	64	Female	Former	LUAD	Strong	8.13333	Progressive	SD	PD-1	Pembrolizumab	HiSeq 2000(Illumina)
	LO3793	10.1126/science.aaa1348	62	Female	Former	LUAD	Weak	3.5	Progressive	SD	PD-1	Pembrolizumab	HiSeq 2000(Illumina)
	LO5004	10.1126/science.aaa1348	56	Female	Former	LUAD	Weak	6.3	Progressive	SD	PD-1	Pembrolizumab	HiSeq 2000(Illumina)
	M4945	10.1126/science.aaa1348	66	Male	Former	LUAD	Unknown	14.6	Non-progressive	PR	PD-1	Pembrolizumab	HiSeq 2000(Illumina)
	MA7027	10.1126/science.aaa1348	56	Male	Former	LUAD	Weak	1.8	Progressive	PD	PD-1	Pembrolizumab	HiSeq 2000(Illumina)
	NI9507	10.1126/science.aaa1348	41	Female	Current	LUAD	Weak	1.86667	Progressive	PD	PD-1	Pembrolizumab	HiSeq 2000(Illumina)
	R7495_2	10.1126/science.aaa1348	63	Male	Former	LUAD	Weak	1.36667	Progressive	PD	PD-1	Pembrolizumab	HiSeq 2000(Illumina)
	RH090935	10.1126/science.aaa1348	78	Female	Former	LUAD	Strong	10.4333	Non-progressive	PR	PD-1	Pembrolizumab	HiSeq 2000(Illumina)
	RI1933	10.1126/science.aaa1348	60	Female	Former	LUAD	Strong	16.6	Non-progressive	PR	PD-1	Pembrolizumab	HiSeq 2000(Illumina)
	RO3338	10.1126/science.aaa1348	71	Male	Former	LUAD	Weak	2.13333	Progressive	PD	PD-1	Pembrolizumab	HiSeq 2000(Illumina)
	SA9755	10.1126/science.aaa1348	63	Female	Former	NA	Weak	8.36667	Non-progressive	PR	PD-1	Pembrolizumab	HiSeq 2000(Illumina)
	SB010944	10.1126/science.aaa1348	68	Male	Never	LUSC	Unknown	27.3	Non-progressive	PR	PD-1	Pembrolizumab	HiSeq 2000(Illumina)
	SC0899	10.1126/science.aaa1348	64	Female	Current	LUAD	Weak	12.5667	Non-progressive	PR	PD-1	Pembrolizumab	HiSeq 2000(Illumina)
	SC6470	10.1126/science.aaa1348	59	Male	Current	LUAD	Weak	8.33333	Progressive	SD	PD-1	Pembrolizumab	HiSeq 2000(Illumina)
	SR070761	10.1126/science.aaa1348	51	Female	Former	LUSC	Negative	3.43333	Progressive	PD	PD-1	Pembrolizumab	HiSeq 2000(Illumina)
	TU0428	10.1126/science.aaa1348	66	Male	Current	LUAD	Negative	2.06667	Progressive	PD	PD-1	Pembrolizumab	HiSeq 2000(Illumina)
	VA1330	10.1126/science.aaa1348	71	Female	Former	LUAD	Unknown	4.13333	Progressive	SD	PD-1	Pembrolizumab	HiSeq 2000(Illumina)
	VA7859	10.1126/science.aaa1348	57	Female	Former	LUAD	Unknown	6.26667	Progressive	SD	PD-1	Pembrolizumab	HiSeq 2000(Illumina)
	WA7899	10.1126/science.aaa1348	49	Male	Never	LUAD	Strong	1.9	Progressive	PD	PD-1	Pembrolizumab	HiSeq 2000(Illumina)
	Y2087	10.1126/science.aaa1348	68	Female	Never	LUAD	Weak	8.33333	Progressive	SD	PD-1	Pembrolizumab	HiSeq 2000(Illumina)
	ZA6505	10.1126/science.aaa1348	76	Female	Never	LUAD	Negative	1.93333	Progressive	PD	PD-1	Pembrolizumab	HiSeq 2000(Illumina)
	ZA6965	10.1126/science.aaa1348	57	Female	Former	LUAD	Strong	4.43333	Non-progressive	PR	PD-1	Pembrolizumab	HiSeq 2000(Illumina)

## Sheet: Table S3
Table S3 Specific genes used for enrichment analysis in each infiltrating immune cell subtype
Immune cell subtype	Gene
Activated B cells	AKNA	ARHGAP25	CCL21	CD180	CD2	CD27	CD37	CD38	CLEC17A	CLEC9A	CLECL1	FAIM3	FAM65B	GIMAP4	MAP4K1	PAX5	TNFRSF17	TRAF3IP3
Activated CD4	ANLN	BRIP1	BUB1B	CASC5	CCNB1	CCNB2	CCNE2	CEP55	CKAP2L	DLGAP5	DTL	E2F8	ECT2	ESCO2	EXO1	EXOC6	FBXO5	FIGNL1	HELLS	HMMR	IARS	KIF11	KIF18A	KIF20A	KNTC1	MAD2L1	MASTL	MTHFD2	NCAPG2	NCAPH	NEIL3	NUF2	PRC1	PSAT1	RTKN2
Activated CD8	ADRM1	AHSA1	C1GALT1C1	CCT5	CCT6B	CETN3	CSE1L	EIF2S1	GAL	GEMIN6	GPT2	KIAA0101	MND1	MPZL1	MRPS16	PCNA	PTRH2	RFC5	SPC25	TIMM13	TIMM8B	TK1	TUBB	TXNDC17
Central memory CD4	ADAM19	AHNAK	AIM2	COL4A1	CYLD	DPEP2	EPHA4	FYN	IL6R	IPCEF1	KLF10	MAL	MALT1	NXN	OPTN	PLCL2	PNRC1	SMAD4	SPOCK2	TRIB2	TXK
Central memory CD8	ADAM23	ATP2B4	BCL2L11	CD300A	CD80	CHN1	F2R	F8	GABARAPL1	GPR183	KLRK1	MSC	PYHIN1	RCAN2	RGS1	SLAMF1	SLFN11	ZEB2
Cytotoxic cells	BST2	BTN3A2	IL10RA	KLRB1	LAT2	LILRA2	SELL	SLAMF6	SLAMF7
DC	C1QC	CCDC88A	CCL13	CCL3L1	CCL3L3	CD300E	CD86	CLEC1A	CLEC4C	CLEC5A	CLIC2	CSF2RA	FAM49A	FCGR1A	FN1	FSTL1	GPR109B	GPX3	HLA-DQA2	INHBA	LGMN	NGFR	PDGFRL	PDPN	PRKAR2B	SIGLEC1	SIGLEC5	SLAMF9	STAB1	THBD	TNFAIP2	TTYH2	UBD	VCAM1
Effector memory CD4	BMI1	CASP3	CNOT10	COPB2	DARS	EXOSC9	EZH2	GDE1	IFT74	KLF5	NDUFB9	NUP205	SHCBP1	XRCC6
Effector memory CD8	APOBEC3H	ARHGAP10	ATP10D	BIRC3	C3AR1	CCL4	CD244	CD55	CFLAR	CMKLR1	DAPP1	DFNB31	DRAM1	EFNA5	FCGR2C	FCGR3A	FCRL6	FGR	GPR114	GZMH	HAPLN3	HLA-DMB	HLA-DPA1	HLA-DPB1	IFI16	IKZF2	IL15	IL2RB	JAKMIP1	KLRD1	LY96	NFKBIA	PLXNC1	PPP4R1	PTPN22	RGS18	SETD7	SH2D1B	SLA2	STXBP1	TLR5	TYROBP
Eosinophil	CCL24	CFD	CREB3	EGR1	EPX	FBXO16	HFE	HIVEP1	HIVEP2	MBP	PRNP	RNASE2	RNASE3	S100A4	SIGLEC8
iDC	ATP6V1A	C1QB	CHST11	CSF1	DPYD	FNDC3B	GRP	IL1RN	INPP5F	LPL	LPXN	MMD	PLAU	PLCB2	RAB38	RDX	RRAGD	TACSTD2	TGM2	TIMD4	TM7SF4
Immature B cells	BANK1	CD22	CYBB	ETS1	FAM129C	FCRL1	FCRL2	FCRL3	FCRL5	FCRLA	HDAC9	HLA-DOB	HLA-DQA1	HVCN1	KIAA0226	NCF1	NCF1B	P2RY10	PNOC	SP100	STAP1	TAGAP	TXNIP	ZCCHC2
Macrophages	AIF1	CCL1	CCL14	CCL26	CD163	CD300LB	CNR1	CNR2	CPM	CSF3R	ENG	FCAR	IGF1	IL34	L1CAM	LILRA1	LILRA5	LRP1	MS4A7	MS4A8B	TREM1	TREML1
Mast cells	ACSL4	ADAMTS3	ADCYAP1	ARHGAP15	ATP8B4	C19orf59	CASQ1	CLC	CMA1	CPA3	CTSG	DUSP14	EGR3	EMR1	FST	HDC	HEY1	KRT1	LXN	MEIS2	MS4A2	MS4A3	NLRP3	NTRK1	PLAT	PTGS1	PTGS2	RGS16	SCG2	SDPR	SERPINB2	SIGLEC14	SIGLEC6	SLC18A2	SLC24A3	TAL1	TARP	TIE1	TIMP1	TNFAIP6	TSPAN4	VAT1
mDC	ATP5O	CBX1	DNAJC15	ENSA	FOXN3	PRCP	SSB	TPMT
Memory B cells	AICDA	CCNA2	CDKN3	CLCN5	ENPP1	FCER1A	FCRL4	MYC	RUNX2	SORL1	SOX5	STAT5A	STAT5B	TLR9
Monocytes	ACTR3	ANXA5	ARPC2	ATP6V1B2	BASP1	CD300LF	DAZAP2	EIF4A1	EIF4G2	EMP3	FCN1	FTL	GABARAP	HIF1A	LITAF	NCOA4	OLR1	RAB1A	RHOA	SAT1	SDCBP	SRGN	TEK	TMBIM6	UBE2D3
Neutrophils	ABTB1	AMPD2	CAMP	EMR4P	FPR1	FPR2	GPR77	MAEA	PROK2	SEC14L1	SEPX1	SLC25A37	TNFSF14	TREML4	VNN2	XPO6
NK	AKT3	AXL	CDH2	CRTAM	CYTH1	FASLG	GRB2	KLRG1	LILRB5	LST1	MAPK4	NOTCH3	PIK3CG	PILRA	PLCG2	SIGLEC7	SIGLEC9
NK56 bright	C11orf75	DYNLL1	HCP5	HDGFRP2	KRT86	MLST8	MYL6B	TAX1BP3
NK56 dim	AKR7A3	CLTB	FAM27A	GLS2	GPRC5C	GRIN1	HLA-E	KIR2DS4	KLHL21	KRT80	MPL	PHRF1	PORCN	PQBP1	PSMC4	TEX264	UPP1
NKT	BTN2A2	CD101	GNLY	KIR2DL1	KIR2DL3	KIR3DL1	KIR3DL2	KLRC1	MICB	NCR1	NFATC2IP	TNFRSF11A
pDC	CBX6	DAB2	DDX17	HIGD1A	IDH3A	IL3RA	MAGED1	NUCB2	OFD1	OGT	PDIA4	SERTAD2	SIRPA	SPCS3	TMED2	TMX1	UGCG	ZDHHC17
T cells	BATF	BTLA	CCL11	CCL17	CCL22	CCL3	CCL5	CCL7	CCR1	CCR3	CCR4	CCR8	CD1A	CD1B	CD1C	CD1D	CD1E	CD247	CD28	CD3D	CD3E	CD3G	CD69	CD8A	CXCR1	CXCR4	CXCR5	CXCR6	FGFBP2	FLT3	FOSL1	GRAP2	HLA-DRA	HLA-DRB1	HLA-DRB5	HRH2	IFNG	IL10	IL12B	IL12RB1	IL12RB2	IL18R1	IL18RAP	IL1B	IL21	IL21R	IL24	IL26	IL27
TFH	B3GAT1	BCL6	CCR7	CD200	CD83	CD84	CDK5R1	FGF2	GPR18	PDCD1
TGD	ACP5	C1orf54	CARD8	CCL18	CD209	CD33	CECR1	CLEC10A	CLEC4A	CSF1R	FCER1G	FCGR2A	FCGR2B	FCGR3B	FGF7	FGL2	FPR3	GM2A	GPNMB	HCK	HK3	LIPA	MARCO	MMP12	MNDA	MRC1	MS4A6A	NPL	PLA2G7	PLEK	RAB23	RNASE6	SDC2	SLAMF8	SLC15A3	SLC38A6	SLC7A7	SPP1	TFEC	TM6SF1	TNFSF8	TREM2	TRPV2
Th1	ADAM8	CCR5	CD151	CD48	CD52	CD53	CD6	CD68	CD7	CD96	CD97	EBI3	GPR84	HAVCR2	ICAM1	ICAM3	IGSF6	IL12A	IL7R	IRF1	ITGA4	ITGAM	ITGAX	ITGB2	ITGB4	ITGB7	LTA	LTB	METRNL	P2RX5	PTPRC	SPN	TBX21	TLR6	TNFRSF1A	TNFRSF9	TRAT1
Th17	ABP1	B4GALNT4	C2CD4A	C2CD4B	CA2	CCDC65	CEACAM3	CHRM3	DOC2B	F12	FURIN	GPR25	IL17A	IL17C	IL17F	IL17RC	IL17RE	IL23A	ILDR1	LONRF3	LTK	MOCOS	SH2D6	TNIP2	TRAF3IP2	YBX2
Th2	ASB2	CALD1	CCR2	CSRP2	DAPK1	DLC1	DNAJC12	DUSP6	GATA3	GNAI1	HTR2B	LAMP3	NRP2	OSBPL1A	PDE4B	PHLDA1	PLA2G4A	RAB27B	RBMS3	RNF125	SIGLEC10	SKAP1	SMAD2	TMPRSS3	UBASH3A
Treg	CCL19	CD34	CD72	CTLA4	FOXP3	GADD45B	GEM	IL1RL1	IL9R	MADCAM1	MYH10	NCF2	RCSD1	RYR1	SELE	SELP	SFRP1	SIT1	TIGIT	TLR10	TLR2	TLR7	TLR8	TRAF1	WIPF1	TGFB1
MDSC	ADORA3	AG2	ARG1	BIN2	C1orf162	CAPS	CD117	CD11B	CD11C	CD124	CD14	CD15	CD163L1	CD1D1	CD21	CD23	CD274	CD31	CD35	CD40	CD43	CD44	CD66B	COX2	CR2	CTR9	EBP	FAM48A	FAM70B	FCER2	FCGRT	FERMT3	FLOT1	FLT1	GIMAP7	GLI4	GNA15	GPR34	GPSM3	HLA-DR	IDO	IKZF1	IL12	IL13	IL18BP	IL1R	IL4RA	INPP5D	ITGA3
[truncated: 37 more columns]

## Sheet: Table S4
Table S4 Specific genes used for enrichment analysis in each curated immune-related signature
Immune signatures	Genes
Type 1 IFN response	MX1	TNFSF10	RSAD2	IFIT1	IFIT3	IFIT2	IRF7	DDX4	MX2	ISG20
Type 2 IFN response	GPR146	SELP	AHR
Cytolytic activity	GZMA	PRF1
T cell inflamed signature	CD274	CD276	CCL5	CD27	CD8A	CMKLR1	CXCL9	CXCR6	IDO1	LAG3	NKG7	PDCD1LG2	PSMB10	HLA-DQA1	HLA-DRB1	HLA-E	STAT1	TIGIT
IFNγ signature	GBP1	IFI16	IFI30	IFNG	IRF1	STAT1	TAP1	TAP2	PSMB9	IL15RA	GZMA	GZMB	CXCL10	CXCL9	TBX21
Stromal cells signature	DCN	PAPPA	SFRP4	THBS2	LY86	CXCL14	FOXF1	COL10A1	ACTG2	APBB1IP	SH2D1A	SULF1	MSR1	C3AR1	FAP	PTGIS	ITGBL1	BGN	CXCL12	ECM2	FCGR2A	MS4A4A	WISP1	COL1A2	MS4A6A	EDNRA	VCAM1	GPR124	SCUBE2	AIF1	HEPH	LUM	PTGER3	RUNX1T1	CDH5	PIK3R5	RAMP3	LDB2	COX7A1	EDIL3	DDR2	FCGR2B	LPPR4	COL15A1	AOC3	ITIH3	FMO1	PRKG1	PLXDC1
Immune cells signature	LCP2	LSP1	FYB	PLEK	HCK	IL10RA	LILRB1	NCKAP1L	LAIR1	NCF2	CYBB	PTPRC	IL7R	LAPTM5	CD53	EVI2B	SLA	ITGB2	GIMAP4	MYO1F	HCLS1	MNDA	IL2RG	CD48	AOAH	CCL5	LTB	GMFG	GIMAP6	GZMK	LST1	GPR65	LILRB2	WIPF1	CD37	BIN2	FCER1G	IKZF1	TYROBP	FGL2	FLI1	IRF8	ARHGAP15	SH2B3	TNFRSF1B	DOCK2	CD2	ARHGEF6	CORO1A
TLS	CCL19	CCL21	CXCL13	CXCL11	CCL8	CXCL10	CXCL9	CCL2	CCL3	CCL18	CCL5
B/P Metagene	IRF4	CD79A	POU2AF1	TNFRSF17	LAX1	CKAP2	IGHG1	IGHV1-69	IGKC	IGKV3-20	IGJ	LOC91316	FAM20B	IGKV4-1	NTN3	IGLJ3	IGLL3	IGKV1D-13	LOC652493	IGHM	IGHA1	LOC100130100	IGHV3-23	LOC100287723
T/NK Metagene	HLA-E	TNFAIP3	HCLS1	INPP5D	PIK3CD	CD48	MFNG	CD37	GMFG	SELL	FGL2	ARHGAP25	LCK	IL10RA	SASH3	PTPRCAP	CSF2RB	CD3E	GZMA	CD27	CCR7	GZMK	CCR2	LTB	PRKCB	CORO1A	TRAC	YME1L1	IL16	CD247	SH2D1A	GPR18	TRBC1	ITK	EVI2B	FYB	IL23A	PTPRC	CD3D	RAC2	NKG7	CTSW	KLRB1	XCL2	LPXN	GIMAP5	ARHGAP15	GIMAP6	PVRIG
M/D Metagene	CSF1R	HLA-DPA1	HLA-DPB1	CD4	HLA-DQB1	LST1	HLA-DMA	EVI2A	HLA-DRA	CYBB	HLA-DMB	DOCK2	ALOX5AP	LAT2	SRGN	HLA-DRB1	CD74	PTPRC	HLA-DQA1
Immune cell subsets	CD1C	CD2	CD3E	CD3D	CD3G	CD6	CD7	CD8A	CD8B	CD19	CD20	NKG7	KLRD1	KLRC1	KIR2DL4	CD24	CD38
Immune signaling molecules	SH2D1A	TIGIT	PTPRCAP	LAX1	SPIB	SLAMF1	TCL1A	TRAT1	THEMIS	LCK	SIT1	HSH2D	ITK	PTPRC	ZAP70	CRTAM	TIMD4	SIRPG	SLA2	DC247	TBX21	RHOH	HSH2D	TBET	POU2AF1	BLK	PAX5	BANK1	STAP1	IKZF3	TNFRSF17	MS4A1	SPIB	AIM2	SKAP1	IFI27	NLRP2	ZBP1	TIBAB	GZMA	CHIT1	MMP12	HAMP	ERAP2	MARCO	GBP5	SLAMF6	KLRK1	LILRA4
Cytokines chemokines	IFNG	FDCSP	CXCL9	CXCL10	CXCL11	CXCL13	CCL21	CCL19	CCL7	XCL1	XCL2	CCR4	CXCR5	CXCR3	DARC	IL7R	IL21R	IL22RA2
[truncated: 92 more columns]

## Sheet: Table S5
Table S5 Sample size and cohorts for specific HSPG2-related analyses in this study
HSPG2-related analyses	Sample size	Cohorts
Melanoma ICI prognosis analysis	626	Integrated melanoma ICI cohort
Melanoma TMB analysis	631/457	Integrated melanoma ICI cohort/TCGA melanoma cohort
Melanoma NB analysis	224/340	Integrated melanoma ICI cohort/TCGA melanoma cohort
Melanoma immunological analysis	457	TCGA melanoma cohort
NSCLC ICI prognosis analysis	109	Integrated NSCLC ICI cohort
NSCLC ICI response rate analysis	102	Integrated NSCLC ICI cohort
NSCLC TMB analysis	109/995	Integrated NSCLC ICI cohort/TCGA NSCLC cohort
NSCLC NB analysis	109/665	Integrated NSCLC ICI cohort/TCGA NSCLC cohort
NSCLC immunological analysis	995	TCGA NSCLC cohort
Melanoma chemotherapy prognosis analysis	457	TCGA melanoma cohort
NSCLC chemotherapy prognosis analysis	978	TCGA NSCLC cohort

## Sheet: Table S6
Table S6 The extracted 4 mutational signatures and their mutational activities in the pooled melanoma cohort
Sample ID	Signature 1	Signature 4	Signature 7	Signature 11
CR0095_T_N	0.00751452	0.0691947	0.799856	0.0192937
CR04885_T_N	1.19e-67	0.0322074	0.944151	0.0166825
CR06670_T_N	0.00382208	0.0990499	0.8486	0.0317195
CR1509_T_N	0.00665726	0.0335719	0.87345	0.0719744
CR22640_T_N	0.00106215	0.0106141	0.988324	1.73e-111
CR3665_T_N	0.0329088	0.13752	0.638983	0.108706
CR6126_T_N	0.00142268	0.0368847	0.926027	0.0299563
CR6161_T_N	0.00103296	0.0117007	0.946381	0.0295171
CR9306_T_N	0.000530324	0.0137507	0.923424	0.0564934
CR9699_T_N	0.00297249	0	0.983566	0.00830173
DFCI_MM_1-TP-NB-SM-BZRJ8-SM-BZRJC	0.0227221	0.525737	0.10557	0.13165
DFCI_MM_2-TP-NB-SM-BZRJA-SM-BZRJD	2.57e-12	0.0416639	0.910595	0.0328929
LSD0167_T_N	0.0146074	0.0280857	0.923019	0.0231516
LSD2057_T_N	0.0277488	0.0571853	0.882774	1.18e-66
LSD3484_T_N	0.0100526	0.035839	0.883803	0.0545712
LSD4744_T_N	0.00746024	0.0258605	0.920243	0.0382736
LSD6819_T_N	0.00843637	0.0363426	0.867647	0.0875739
MEL-582186-TP-NB-SM-CN21Q-SM-CJP7T	0.0110638	0.16602	0.767286	0.0451293
MEL-587761-TP-NB-SM-CN1ZV-SM-CJP7Q	0.00762575	0.101489	0.823636	0.0442834
MEL-650366-TP-NB-SM-CN221-SM-CJP7U	0.0281351	0.0947185	0.838958	0.000332314
MEL-682321-TP-NB-SM-CN21G-SM-CJP7S	3.21e-22	0.0474905	0.893494	0.046149
MEL-IPI_Pat02-TP-NB-SM-4DJZX-SM-4NFU4	0.0166873	0.123451	0.75924	0.0676859
MEL-IPI_Pat03-TP-NB-SM-4DJZY-SM-4NFU5	0.00225533	0.0150195	0.189523	0.787503
MEL-IPI_Pat04-TP-NB-SM-4DJZZ-SM-4NFU6	0	0.239669	0.403649	0.161075
MEL-IPI_Pat06-TP-NB-SM-4DK12-SM-4NFU8	0.0263497	0.0949091	0.812841	0.0144181
MEL-IPI_Pat07-TP-NB-SM-4DK13-SM-4NFU9	0	0.318951	0.438273	0.137739
MEL-IPI_Pat08-TP-NB-SM-4DK14-SM-4NFUA	0.00465296	0.0326856	0.940331	2.24e-128
MEL-IPI_Pat100-TP-NT-SM-53U2D-SM-53U4M	0.0468267	0.0547045	0.83906	0.0513561
MEL-IPI_Pat101-TP-NT-SM-4CU6O-SM-53U4N	0.1877	0.449752	0.250187	0.0801504
MEL-IPI_Pat103-TP-NT-SM-4CU6Q-SM-53U4P	0.00825458	0.00947717	0.958178	0.00361942
MEL-IPI_Pat104-TP-NT-SM-4CU6R-SM-53U4Q	0.385761	0.190294	0.39392	0.018311
MEL-IPI_Pat105-TP-NT-SM-4CU6S-SM-53U4R	0.0173578	0.0850315	0.776983	0.0864961
MEL-IPI_Pat106-TP-NT-SM-4CU6T-SM-4MGPK	0.637024	0.083816	0.0360391	0.0929375
MEL-IPI_Pat110-TP-NT-SM-4CU6X-SM-4MGPO	2.61e-298	0.00755631	0.991053	6.13e-24
MEL-IPI_Pat111-TP-NT-SM-4CU6Y-SM-4MGPP	7.94e-289	0.121497	0.832317	0.046186
MEL-IPI_Pat113-TP-NT-SM-53U2Q-SM-4MGPR	0.0326217	0.0956317	0.827324	1.88e-63
MEL-IPI_Pat115-TP-NT-SM-5X2QS-SM-5X2RA	0.153476	0.247329	0.405644	0.177297
MEL-IPI_Pat117-TP-NT-SM-5X2QU-SM-5X2RC	0.00703869	0.015055	0.922545	0.0546064
MEL-IPI_Pat118-TP-NT-SM-5X2QV-SM-5X2RD	0.0452391	0.0639324	0.714583	0.0585679
MEL-IPI_Pat119-TP-NT-SM-7459N-SM-7459Q	0.0238183	0.230367	0.652145	0.0695742
MEL-IPI_Pat11-TP-NB-SM-4DK17-SM-4NFUD	0.000381284	1.51e-225	0.952111	0.0475078
MEL-IPI_Pat121-TP-NT-SM-7459K-SM-5X2RG	0.271334	0.293605	0.188916	0.223697
MEL-IPI_Pat123-TP-NB-SM-5X2R1-SM-5VWHL	0.0294055	0.0564825	0.850012	0.0354357
MEL-IPI_Pat124-TP-NB-SM-7459L-SM-5VWHM	0.0155767	0.0525537	0.849759	0.04465
MEL-IPI_Pat126-TP-NB-SM-5X2R4-SM-5VWHO	0.0181607	0.14797	0.732245	0.0903583
MEL-IPI_Pat127-TP-NB-SM-5X2R5-SM-5VWHP	0.0836727	0.174933	0.636284	0.0684542
MEL-IPI_Pat128-TP-NB-SM-5X2R6-SM-5VWHQ	0.0303191	0.265051	0.585235	0.0701485
MEL-IPI_Pat129-TP-NT-SM-5X2R7-SM-5X2RI	0.122925	0.0442277	0.707072	0.075159
MEL-IPI_Pat12-TP-NB-SM-7459O-SM-4NFUE	0.0569324	0.0527191	0.884921	2.51e-142
MEL-IPI_Pat132-TP-NB-SM-5VWJA-SM-5VWHR	0	3.78e-94	0.0722886	0.925275
MEL-IPI_Pat133-TP-NB-SM-7A14Z-SM-5VWHS	0.0672113	0.39327	0.216696	0.136712
MEL-IPI_Pat134-TP-NB-SM-5VWJC-SM-5VWHT	0.014545	0.0343814	0.933824	0.000659151
MEL-IPI_Pat135-TP-NB-SM-7A152-SM-5VWHU	0.0338352	0.103468	0.708971	0.13877
MEL-IPI_Pat138-TP-NB-SM-7A155-SM-5VWHX	1.53e-10	0.0049601	0.148189	0.812429
MEL-IPI_Pat139-TP-NB-SM-5VWJH-SM-5VWHY	0.00895701	0	0.966287	0.0214538
MEL-IPI_Pat13-TP-NB-SM-4DK19-SM-4NFUF	0.0402234	0.127189	0.70357	0.104892
MEL-IPI_Pat140-TP-NB-SM-5VWJI-SM-5VWHZ	0.0214642	0.047793	0.901782	0.0175795
MEL-IPI_Pat143-TP-NB-SM-7A156-SM-5VWI3	0.0382262	0.090629	0.781254	0.0537593
MEL-IPI_Pat144-TP-NB-SM-7A157-SM-5VWI4	0.141652	0.0910502	0.681287	0.0623527
MEL-IPI_Pat147-TP-NB-SM-7A158-SM-5VWI7	0.0571011	0.0308211	0.824708	0.0859626
MEL-IPI_Pat148-TP-NB-SM-5VWJQ-SM-5VWI8	0.0202524	0.112956	0.853574	0.00229254
MEL-IPI_Pat14-TP-NB-SM-53U3C-SM-4NFUG	0.191752	0.514018	6.91691904177745e-323	0.271219
MEL-IPI_Pat151-TP-NB-SM-7A15A-SM-5VWIB	0.00504101	4.52e-05	0.0385526	0.907544
MEL-IPI_Pat157-TP-NB-SM-7A15B-SM-5VWIH	0.129054	0.23122	0.459221	0.166565
MEL-IPI_Pat159-TP-NB-SM-5VWK2-SM-5VWIJ	6.04e-258	0.0600278	0.899408	0.0348195
MEL-IPI_Pat15-TP-NB-SM-4DK1B-SM-4NFUH	6.48e-128	0.0972834	0.726154	0.105144
MEL-IPI_Pat160-TP-NB-SM-5VWK3-SM-5VWIK	0.115041	0.714839	7.90505033345994e-323	0.050976
MEL-IPI_Pat162-TP-NB-SM-7A15D-SM-5VWIM	0.386321	0.374564	5.6e-38	0.157289
MEL-IPI_Pat163-TP-NB-SM-5VWK6-SM-5VWIN	0.00300992	0.151382	0.521834	0.288911
MEL-IPI_Pat166-TP-NB-SM-7A15G-SM-5VWIQ	0.848842	1.48219693752374e-323	2.32e-129	0.151158
MEL-IPI_Pat167-TP-NB-SM-7A15H-SM-5VWIR	0.256176	0.36963	0.0640503	0.136515
MEL-IPI_Pat168-TP-NB-SM-5VOAX-SM-5VWIS	0.0377188	0.333144	0.559999	0.0556528
MEL-IPI_Pat16-TP-NT-SM-53U3E-SM-53U5B	0.00336514	0.0354813	0.946534	0.00819065
MEL-IPI_Pat170-TP-NB-SM-5VOAZ-SM-5VWIU	0.0207145	0.0939907	0.86056	0.000175089
MEL-IPI_Pat171-TP-NB-SM-7A15J-SM-5VWIV	1.53e-157	0.669549	2.47e-44	0.209447
MEL-IPI_Pat174-TP-NB-SM-5VOB4-SM-5VWIY	0.00406139	0.0169026	0.970432	0.00860449
MEL-IPI_Pat175-TP-NB-SM-7A15L-SM-5VWIZ	0.125558	0.28121	0.330853	0.216652
MEL-IPI_Pat17-TP-NB-SM-4DK1D-SM-4NFUJ	0.00684101	0.0459583	0.921365	4.11e-98
MEL-IPI_Pat18-TP-NT-SM-4DK1E-SM-53U5D	0.313145	0.432255	0.0104242	0.0952628
MEL-IPI_Pat21-TP-NT-SM-4DK1H-SM-53U5G	9.34e-103	0.00541399	0.96053	0.0309766
MEL-IPI_Pat24-TP-NT-SM-4DK1K-SM-53U5J	0.346504	0.356435	0.0404395	0.119026
MEL-IPI_Pat27-TP-NB-SM-4DK1N-SM-4NFUT	0.265767	0.281382	0.289102	0.132099
MEL-IPI_Pat32-TP-NT-SM-53U3T-SM-53U67	0.0333937	0.0353035	0.901932	0.0124618
MEL-IPI_Pat39-TP-NB-SM-4DK1Z-SM-4NFV6	0.198352	0.236096	0.486436	0.0330345
MEL-IPI_Pat41-TP-NT-SM-4DK22-SM-53U5O	0.0282691	0.0096593	0.938636	0.0163131
MEL-IPI_Pat43-TP-NB-SM-4DK24-SM-4NFVA	0.16087	0.157083	0.290115	0.11474
MEL-IPI_Pat45-TP-NT-SM-4DK26-SM-53U5R	0.00946383	5.72e-150	0.97334	0.0118582
MEL-IPI_Pat46-TP-NT-SM-53U48-SM-53U5S	0.0783426	0.0919891	0.754886	0.0603185
MEL-IPI_Pat47-TP-NT-SM-4DK28-SM-53U5U	0.035524	0.160213	0.689143	0.0568168
MEL-IPI_Pat49-TP-NT-SM-4DK2A-SM-53U5W	0.0132942	0.0210077	0.925448	0.0370783
MEL-IPI_Pat50-TP-NT-SM-53U69-SM-53U5X	0.0183213	0.0138075	0.881024	0.0688789
MEL-IPI_Pat52-TP-NT-SM-4DK2D-SM-53U5Z	0	0.0788044	0.91769	4.12e-105
MEL-IPI_Pat54-TP-NB-SM-4DK2F-SM-4NFVL	0.00747471	0.0172154	0.913907	0.0568724
MEL-IPI_Pat55-TP-NB-SM-4DK2G-SM-4NFVM	0.0231216	0.08329	0.779309	0.09434
MEL-IPI_Pat56-TP-NB-SM-4DK2H-SM-4NFVN	0.150186	0.447166	0.0566931	0.119642
MEL-IPI_Pat57-TP-NB-SM-4DK2I-SM-4NFVO	0.158722	0.268493	0.518804	0.0539807
MEL-IPI_Pat58-TP-NB-SM-4DK2J-SM-4NFVP	0	2.02e-277	0.0737895	0.897469
MEL-IPI_Pat59-TP-NB-SM-4DK2K-SM-4NFVQ	0.0264314	0.0260163	0.830833	0.116719
MEL-IPI_Pat60-TP-NB-SM-4DK2L-SM-4NFVR	3.49e-12	0.022479	0.903626	0.0571246
MEL-IPI_Pat61-TP-NB-SM-4DK2M-SM-4NFVS	0.0866673	0.429131	0.172084	0.0961317
MEL-IPI_Pat62-TP-NB-SM-4DK2N-SM-4NFVT	0.00452416	0.0183508	0.650897	0.308681
MEL-IPI_Pat64-TP-NB-SM-4DK2P-SM-4NFVV	0.00139488	0.0651718	0.919702	0.00824928
MEL-IPI_Pat66-TP-NB-SM-4DK2R-SM-4NFVX	0.0109659	0.0835306	0.88191	0.0103047
MEL-IPI_Pat67-TP-NB-SM-4DK2S-SM-4NFVY	0.113848	0.413884	0.209352	7.44e-137
MEL-IPI_Pat71-TP-NB-SM-4DK2W-SM-4NFW3	0.00213698	0.0101609	0.954185	0.0335167
MEL-IPI_Pat73-TP-NB-SM-4DK2Y-SM-4NFW5	0.0113949	0.0400195	0.773352	0.0386572
MEL-IPI_Pat74-TP-NB-SM-4DK2Z-SM-4NFW6	0.0181208	0.0166566	0.906945	0.0487198
MEL-IPI_Pat76-TP-NB-SM-4DK32-SM-4NFW8	0.0480865	0.0692329	0.805047	0.0776339
MEL-IPI_Pat77-TP-NT-SM-4DK33-SM-53U63	0.0103374	0.0357273	0.902413	0.0437464
MEL-IPI_Pat79-TP-NB-SM-53U2S-SM-4NFWB	0.034582	0.00834187	0.953468	3.33e-48
MEL-IPI_Pat80-TP-NT-SM-4DK36-SM-53U53	0.0307001	0.240029	0.054273	0.422598
MEL-IPI_Pat81-TP-NB-SM-4DK37-SM-4NFWD	0.103586	0.65732	0.184612	7.03e-134
MEL-IPI_Pat82-TP-NT-SM-4DK38-SM-53U55	0.016988	0.0556246	0.747652	0.0897293
MEL-IPI_Pat83-TP-NT-SM-53U2W-SM-53U56	0.213008	0.168664	0.589872	1.48219693752374e-323
MEL-IPI_Pat85-TP-NB-SM-53U2Y-SM-4NFWH	0.016623	0.0711082	0.887408	2.23e-12
MEL-IPI_Pat86-TP-NT-SM-4DK3C-SM-53U59	0.129463	0.165179	0.469289	0.158513
MEL-IPI_Pat87-TP-NT-SM-4DK3D-SM-53U5A	0.175015	0.539684	3.95252516672997e-323	0.187025
MEL-IPI_Pat90-TP-NB-SM-4DK3G-SM-4NFWM	0.10779	0.0150039	0.863225	5.54e-83
MEL-IPI_Pat98-TP-NT-SM-4CU6L-SM-53U4K	0.364128	0.413226	1.16e-48	0.0961028
MEL-IPI_Pat99-TP-NT-SM-4CU6M-SM-53U4L	0.414674	0.490291	1.35e-138	0.0950353
NR1867_T_N	0.0427038	0.685499	0.0604954	0.0521443
NR2137_T_N	0.00394181	2.07e-275	0.941765	0.0487286
NR3549_T_N	0.0023527	0.0608357	0.918058	1.56e-37
NR4018_T_N	0.00394853	0.061122	0.805798	0.090103
NR4045_T_N	0.00796342	0.0152489	0.930446	0.042986
NR4083_T_N	4.98e-168	0.0286717	0.930605	0.0322989
NR4631_T_N	2.97e-22	9.67e-77	0.989146	1.66e-74
NR4810_T_N	0.007446	0.0304065	0.870641	0.0500702
NR4949_T_N	3.44e-301	0.0884457	0.803674	0.0740523
NR8815_T_N	7.04e-263	0.00438623	0.957677	0.0258471
NR9445_T_N	0.00917399	0.0633501	0.803656	0.12138
NR9449_T_N	0.00204986	0.0690116	0.859136	0.0101304
NR9521_T_N	0.000436496	0.0285543	0.947457	0.0220007
NR9705_T_N	0.167176	0.278514	6.91691904177745e-323	0.117674
NR9765_T_N	0.0390665	0.182172	0.65423	0.0849831
Patient1	0.0535655	0.726446	0.119869	1.42e-59
Patient10	0.0733759	0.397605	0.192623	0.110734
Patient100	4.94065645841247e-324	0.171435	0.328285	0.092232
Patient102	0	0.0842279	0.406299	0.0351498
Patient104	0.0438119	0.672899	0.138195	0.044557
Patient105	8.89e-112	0.191834	0.325743	3.55e-26
Patient106	0.0406966	0.0720433	0.520558	0.0850956
Patient107	0.0602359	0.17311	0.31279	0.120342
Patient108	1.91e-230	0.536684	0.161627	1.1e-134
Patient11	0.0107454	0.35353	0.132634	0.0826582
Patient110	1.61e-219	0.0301757	0.453132	2.95e-124
Patient112	4.94065645841247e-324	0.0463772	0.450324	1.11e-17
Patient116	0	0.0721617	0.494668	1.8e-116
Patient117	0.0193036	0.73432	0.0109178	0
Patient118	0.0202094	0.0915425	0.478897	0.0170235
Patient119	1.05e-11	0.470119	0.245463	2.66e-200
Patient120	0	0.0361343	0.462336	0.00141465
Patient121	0.00190174	0.0716628	0.47492	0.0197198
Patient125	0.160104	0.280303	0.133559	0.0576309
Patient126	2.09e-111	0.102484	0.432046	0.0164791
Patient127	5.86e-71	0.0693484	0.458435	0.0614389
Patient13	0	0.0266273	0.488457	0.0230092
Patient130	0.0838864	0.0577247	0.446129	2.07e-86
Patient131	2.18e-202	0.0850259	0.474191	1.82e-34
Patient132	2.96e-74	0.0177458	0.502226	0.00824851
Patient133	7.13878015382653e-315	0.0357805	0.393314	0.108775
Patient134	1.46e-191	0.0867839	0.326472	0.0139384
Patient135	1.35e-248	0.0483758	0.443728	0.0307539
Patient136	0.0187377	0.061524	0.461793	2.18e-25
Patient137	0	0.0430032	0.43135	0.000910674
Patient14	0.0728071	0.474255	0.123229	1.5e-22
Patient140	2.13e-116	0.0527758	0.472953	7.87e-07
Patient141	2.6e-190	0.114069	0.38542	0.00561414
Patient142	0.099211	0.349508	0.158929	2.96439387504748e-323
Patient143	2.67e-20	0.125903	0.418802	0.0384438
Patient144	2.38e-143	0.0524921	0.468001	2.26e-15
Patient145	4.97e-208	0.076789	0.497317	0.0150331
Patient146	3.33e-206	0.0541187	0.414732	0.0446061
Patient147	2.24e-79	0.0414325	0.452857	4.14e-192
Patient148	5.04e-90	0.090755	0.418757	5.89e-11
Patient149	2.76e-05	0.0536569	0.41587	6.49e-180
Patient15	1.2e-21	0.318956	0.294911	0.0724382
Patient150	0.360014	0.289757	0.323784	6.91691904177745e-323
Patient154	0.0332318	0.0714498	0.502955	0.118828
Patient155	2.05e-251	0.0593934	0.451877	0.0322905
Patient156	0.0206775	0.0785551	0.523194	1.43e-37
Patient157	0.0049398	0.0346883	0.478456	0.0186085
Patient158	0.0553747	0.00939007	8.79e-246	0.685801
Patient159	0.126816	0.596626	6.4228533959362e-323	0.264322
Patient162	2.14e-179	0.0198837	0.49402	2.65e-43
Patient163	0.00714227	0.0320496	0.54249	0.024327
Patient165	0.0043742	0.0365624	0.513813	5.55e-20
Patient166	0.145613	0.722367	2.32e-50	0
Patient167	0	0.804096	6.91691904177745e-323	0.100159
Patient168	9.88131291682493e-324	0.0320277	0.296904	0.0321434
Patient169	0	0.0137896	0.481064	0.000109517
Patient17	2.09218652011274e-313	0.116249	0.40507	0.0298131
Patient170	0.126461	0.490832	0.0414873	0.160298
Patient172	1.35e-227	0.0442506	0.427849	0.0223415
Patient173	0.0634626	0.507883	0.14208	0.0220412
Patient179	2.78e-54	0.0824672	0.455052	0.010307
Patient18	0.0104118	0.0676077	0.443125	2.18e-104
Patient180	3.94e-266	0.0249855	0.519916	5.78e-05
Patient181	3.49e-84	0.120859	0.500698	9.26e-215
Patient182	4.99e-167	0.0926115	0.340512	0.0549746
Patient183	5.73e-297	0.0240178	0.41499	0.00424675
Patient184	0.0166911	0.0448155	0.483069	4.11e-92
Patient185	0.0193125	0.0674434	0.363483	0.056807
Patient187	0.0528197	0.0902389	0.517287	0.0623293
Patient188	0	0.303899	0.414528	0.11197
Patient189	1.98e-24	0.651304	0.136248	1.08e-72
Patient191	9.73e-200	3.69e-78	0.498242	9.35e-32
Patient192	3.75e-180	0.0377138	0.449061	0.0330607
Patient193	1.74e-42	0.0421155	0.48353	2.17e-35
Patient195	2.22e-161	0.0626002	0.450211	3.63e-37
Patient196	1.71e-284	0.00759303	0.479692	0.017876
Patient197	0.0856166	0.388098	0.1295	0.119095
Patient20	3.72e-278	0.0489142	0.412318	0.0806048
Patient200	0.0610995	0.0505712	0.256184	0.295674
Patient201	0.0707536	0.555722	0.193662	0.124884
Patient203	2.18e-184	0.706502	0.188267	7.1e-84
Patient204	2.97e-149	0.0460169	0.466601	0.0172983
Patient205	8.33e-118	0.0342414	0.493015	0.00341559
Patient206	9.89e-34	0	0.486125	6.19e-30
Patient21	2.04e-50	0.858718	2.96439387504748e-323	0.0993423
Patient22	0.0477477	0.526703	0.121989	0.0611443
Patient23	0	0.238606	0.255402	0.125327
Patient24	1.11e-130	0.111901	0.341296	0.031186
Patient25	1.95e-290	0.0397431	0.348256	0.114345
Patient27	0.0194844	0.0861535	0.421609	0.0798693
Patient30	0.0748476	0.168513	0.423049	0.0410447
Patient31	0	0.449543	0.2668	0.0682141
Patient32	0	0.0345464	0.463877	0.00104108
Patient33	6.27e-171	0.504189	2.01e-276	0.442886
Patient34	0	0.720622	2.07507571253324e-322	0.108227
Patient35	9.88131291682493e-324	0.215536	0.417777	5.02e-68
Patient36	7.38e-153	0.0712249	0.408299	8.29e-51
Patient37	8.08e-33	0.685804	6.14e-112	0.0215214
Patient38	0.135335	0.346912	0.485092	0.0326604
Patient39	0	0.811679	0.0426907	4.44e-84
Patient4	2.27432053426835e-312	0.0168238	0.486649	1.56e-147
Patient40	0.0440141	3.72e-306	9.42e-222	0.668767
Patient41	2.74e-160	8.84e-257	0.49426	6.66e-52
Patient42	6.91e-189	0.0622046	0.439725	0.0272354
Patient43	0.101856	0.608507	0.132467	0.0870562
Patient44	0	0.696258	4.29e-24	0.138713
Patient45	8.94e-104	0.107819	0.414366	7.62e-13
Patient46	6.26e-156	0.0335758	0.473645	0.0351966
Patient47	0.00474785	0.0267931	0.48732	0.0172183
Patient48	0.00797544	0.725108	0.0719677	2.43e-13
Patient49	0.0506029	0.0010214	4.94065645841247e-324	0.696432
Patient50	0	0.100666	0.477241	1.83e-32
Patient51	1.81e-183	0.0163832	0.474789	2.71e-07
Patient54	0.0120601	0.248296	0.297488	0.14621
Patient55	3.03e-99	0.0345988	0.486698	2.68e-43
Patient56	0.0655102	0.507375	2.72e-205	0.288178
Patient58	0.027557	0.216413	0.352017	1.42e-170
Patient59	0	0.0443217	0.395018	0.0551743
Patient6	0.060306	0.0138604	5.86e-258	0.691611
Patient60	0	0.0643286	0.41127	4.09e-75
Patient61	9.39e-224	0.010517	0.513719	9.19e-43
Patient62	7.34e-126	0.011447	0.497106	1.49e-81
Patient63	0.0694156	0.462975	0.152063	0.18729
Patient67	0.123003	0.458898	0.258653	1.97e-97
Patient7	0.11489	0.549862	0.181259	0.0169764
Patient72	0.0357285	0.146543	0.290212	0.0723649
Patient73	0.045529	0.340859	0.294056	0.0225544
Patient75	0.00538751	0.0315843	0.491352	6.82e-06
Patient77	0.0316153	0.0398196	0.409444	2.33e-21
Patient78	0.130696	0.521321	8.91e-75	0.185526
Patient79	8.62e-134	0.0912145	0.310141	0.173856
Patient8	4.94065645841247e-324	0.0549808	0.49325	0.0275466
Patient80	4.57e-199	0.645664	0.0727922	0.0460435
Patient82	2.36e-193	0.00863746	0.467396	0.00835522
Patient83	7.45e-241	0.122373	0.306886	0.0795128
Patient84	0.10799	0.682886	3.04e-158	0.07301
Patient86	0.025156	0.0540243	0.398538	1.15e-08
Patient87	0.0323602	0.521008	0.257006	0.0912781
Patient88	1.97626258336499e-323	0.571274	8.37e-127	0.104704
Patient9	4.84e-213	0.112928	0.375328	0.0521485
Patient94	4.94065645841247e-324	0.0468521	0.483721	1.83e-91
Patient96	1.62e-38	0.0353457	0.502196	1.78e-65
Patient98	1.11e-118	0.0731798	0.399833	3.19e-35
Patient99	0.00307356	0.0623663	0.47566	0.0052127
PR12117_T_N	0.00289294	0.0206438	0.919459	0.046108
PR4035_T_N	0	0.0447413	0.894825	0.0290711
PR4046_T_N	0.0179224	0.120274	0.797534	0.0642705
PR4077_T_N	6.11e-37	6.85e-188	0.980322	0.0149626
PR4091_T_N	0.00747536	0.0341419	0.890775	0.0422603
PR4092_T_N	2.21e-280	1.3e-251	0.136034	0.847464
pt0095	1e-193	0.0646571	0.894937	0.0265466
pt0167	0.009086	0.0883125	0.874239	0.00376384
pt0244	0.00609715	5.93e-53	0.896578	0.0816927
pt0346	0.000741959	0.0665305	0.894013	1.66e-17
pt03803	0.31819	0.108381	0.320262	0.161871
pt04885	0.00120952	0.05482	0.939522	8.29e-40
pt06670	0.00623667	0.136617	0.743415	0.0806805
Pt1	0	0.00981103	0.96605	0.0177886
Pt10	3.29e-110	0.159859	0.795031	0.00851796
pt100	1.85e-281	0.0185206	0.147663	0.830771
pt101	0	0.305955	0.479112	0.066625
pt102	0.0027587	0.0737382	0.871762	7.98e-77
pt103	0	0.328835	0.461703	0.122465
pt104	0.00880661	0.0496206	0.909955	8.69e-65
pt105	2.22e-169	0.0887222	0.813657	0.0874794
pt106	0.123473	0.405511	0.380285	1.15e-97
pt107	0	0.0093635	0.982569	2.2e-51
pt108	0.209392	0.0438313	0.653565	0.00207993
pt109	0.0233178	0.0656482	0.861711	0.0133833
Pt11	2.12e-180	0.147066	0.829461	2.3e-81
pt110	0.461111	9.38724727098368e-323	3.35964639172048e-322	3.82e-57
pt111	0.0230849	0.0702493	0.854044	0.0310851
pt112	1.3e-280	7.1e-135	0.948472	0.0515278
pt1120	0.00736453	0.079016	0.871329	0.0371159
pt11217	0.0055945	0.0439666	0.889127	0.0507235
pt113	0	0.0216464	0.976889	1.53e-65
pt114	1.53e-82	0.115077	0.857586	2.25e-42
pt115	0.132216	0.304436	0.351697	0.180075
pt116	0.00465384	0.0145982	0.944278	0.0364703
pt117	0.013206	0.0793025	0.83235	3.6e-68
pt118	0	0.232431	0.67798	0.0590552
pt119	0.276902	0.277995	0.218531	0.147781
Pt12	0.0770064	0.28096	0.421539	0.159925
pt120	0.00366277	0.0795558	0.852815	0.0489168
pt121	0	0.0502858	0.894798	0.0154561
pt122	1.95e-217	0.180338	0.756905	0.0627569
pt123	0.00650649	0.158095	0.75091	0.0632676
pt124	2.47e-84	0.399974	0.581882	1.62e-79
pt125	0.0542159	0.0863395	0.700063	0.0736935
pt126	3.68041436213148e-316	0.14515	0.775196	0.0796537
pt127	0.0172838	0.0631232	0.806463	0.105389
pt128	0.089089	0.240333	0.670578	1.4e-92
pt129	0	0.00303836	0.0882832	0.908678
pt12A	0.0772893	0.0676498	0.77736	0.066225
Pt13	0.00155038	9.87e-17	0.930322	0.0643857
pt130	2.19e-187	0.438805	0.316083	0.099511
pt131	0.0843911	0.0787407	0.672858	0.128626
pt132	1.49e-241	0.00561963	0.164702	0.798536
pt133	0	0	0.980227	0.0176627
pt134	0.0539324	0.678417	5.92878775009496e-323	0.208639
pt135	8.79e-161	0.0546894	0.916672	0.0286368
pt136	0	0.114341	0.808261	0.027567
pt137	0.00383603	0.054863	0.85248	0.0865719
pt138	0.0182746	0.234427	0.747298	1.28e-53
pt139	0	0.0864537	0.771834	0.0755106
Pt14	0	0.0196809	0.954629	0.0165652
pt140	2.17e-136	0.00386816	0.0753591	0.893517
pt141	0.0827602	0.25795	0.553623	0.0788007
pt142	5.89e-07	0.144264	0.754663	0.0793054
pt143	0	0.0579619	0.938222	4.39e-65
pt144	0.0501754	0.856442	1.96e-193	0.0371716
pt145	0.331252	0.514937	0.0396207	0.0625772
pt146	0	0.168323	0.528822	0.279151
pt147	0.163812	0.497769	0.15063	0.0761581
pt148	0.574723	0.148566	9.69e-191	0.276711
pt149	3.38e-110	0.607414	0.230409	0.0778571
pt1494	0.00691732	0.0278698	0.896462	0.0667613
Pt15	9.72e-202	0.0209092	0.921635	0.0516651
pt150	0	0.380207	0.541905	0.0551511
pt1509	0.00656493	0.0178602	0.973672	8.29e-34
pt151	0	0.0595727	0.906562	1.24e-114
pt152	0.0108074	0.141193	0.842017	1.54e-101
pt153	0.00295461	0.684254	1.51e-54	0.206632
pt154	0.00899008	0.0304449	0.947908	0.0126569
pt155	0.0245841	0.355651	0.441957	0.117024
pt156	0.295303	0.509424	0.0697694	3.95252516672997e-323
pt157	0.00820524	3.85e-78	0.947542	0.0163475
pt158	0	0.0179531	0.961241	0.0191967
pt159	0.245452	0.520248	0.0627565	0.0800277
pt15C	0.13047	0.144063	0.457398	0.210131
Pt16	0.00494527	0.0318415	0.941112	0.0132548
pt160	0.231083	0.347324	0.0821981	0.0646009
pt161	0.00902179	0.415373	0.575605	4.44659081257122e-323
pt162	0.00771062	0.00701462	0.0440607	0.912204
pt163	0	0.0416936	0.734358	0.0638866
pt164	0.00662736	0.0385693	0.924714	0.00496758
pt165	0.0722158	1.13635098543487e-322	0.893912	0.0338717
pt1650	0.173332	0.66422	0	0.039944
pt166	0	0.669631	6.73e-164	0.330369
pt167	8.95e-68	0.167332	0.535331	0.195043
pt168	0.00464064	0.00355187	0.0601005	0.90506
pt169	0.0801791	0.395453	0.436409	0.0404908
pt16C	0.117469	0.146765	0.106192	0.249941
pt16D	0.133674	0.26729	0.120015	0.238376
Pt17	0.00377361	0.044446	0.929904	0.00833706
pt170	0	0.266405	0.503436	0.0832964
pt171	0	6.95e-24	0.988662	1.81e-141
pt172	0.0362259	0.187604	0.32151	0.0544712
pt173	0.0169116	0.120639	0.788807	0.0736428
pt174	0.00322932	1.56e-49	0.969821	0.02695
pt175	0.00651853	0.115409	0.843716	0.0182477
pt176	0.0310052	0.231531	0.682404	0.0223691
pt177	0.000999295	0.0295984	0.914162	0.0552399
pt178	0	0.0190769	0.910643	0.057158
pt179	0	0.0293067	0.897551	0.0663713
Pt18	0.013738	0.050217	0.922299	0.00422757
pt180	1.03e-91	0.0988073	0.742752	0.138203
pt181	0.142414	0.510087	0.100186	0.144524
pt182	0.0218584	0.359771	0.546482	0.071888
pt183	0	0.0016721	0.0853877	0.876723
pt184	3.42e-248	0.0185915	0.881187	0.100221
pt185	0	0.0288753	0.917902	0.0410657
pt186	4.86e-200	0.0357964	0.773127	0.182646
pt1867	0.105657	0.730979	7.41e-254	0.0957272
pt187	0.0121422	0.0892237	0.895893	4.69e-109
pt188	0	0.0868406	0.89151	0.0157844
pt189	0.00406978	0.0883125	0.887205	3.83e-10
pt18A	0.0135611	0.486005	0.109919	0.110571
pt18C	0.00724493	0.532729	0.104137	0.150337
Pt19	1.02e-302	0.027467	0.946313	0.00304494
pt190	4.56e-62	0.557635	0.251881	3.15e-49
pt191	0.0531857	4.06e-188	0.929297	6.21e-230
pt192	0	0.00646389	0.95593	0.0376065
pt193	0.00355577	0.0662535	0.707398	0.0862965
pt194	0.00556852	0.0243081	0.90665	0.0517727
pt195	0.0193773	0.120708	0.852768	0.00714625
pt196	0	0.0270553	0.937589	0.0300557
pt197	0	0.454342	0.545658	7.90505033345994e-323
pt198	0.00476113	2.76e-113	0.981699	1.91e-132
pt199	0.0138308	0.233866	0.0239642	0.458175
pt19D	0.114694	0.290762	0.43254	0.0671952
pt1D	0.0407291	0.307317	0.409083	0.185577
Pt2	0.00127284	0.0197143	0.960847	0.0172478
Pt20	0	0.0793509	0.8546	0.0498727
pt200	0.0937982	0.74902	0.115743	0.0141287
pt201	0.00489307	0.0158023	0.782012	0.106887
pt202	0.0616243	0.179465	0.758911	5.7e-194
pt203	3.38e-79	0.0767661	0.892248	0.012644
pt204	0.00804351	0.137259	0.664428	0.0845157
pt205	0	0.0213205	0.967252	1.79e-71
pt2051	0.109874	0.255328	0.145353	0.204307
pt2056	4.94065645841247e-324	0.0965957	0.733069	0.115703
pt2057	0.0486769	0.0933418	0.857981	3.14e-194
pt206	0.0485183	0.040316	0.896291	2.89e-237
pt207	0.0498269	0.498085	0.176277	0.12658
pt208	0.214189	0.491018	0.0108055	0.124183
pt20A	0.00143153	0.0298305	0.908001	0.0547176
pt20E	0.00325961	0.0301472	0.907556	0.0513091
Pt21	0.0194196	0.0468659	0.859108	0.0613547
pt211	0.0109262	0.0971149	0.849472	0.00208129
pt212	4.21e-282	0.2428	0.605923	0.0983519
pt213	0.146053	0.54201	0.16084	0.151097
pt2137	7.19e-186	0.00566972	0.91672	0.0690934
pt215	1.3e-184	0.0554558	0.912652	0.0193218
pt216	0.00696459	0.306555	0.647727	0.014937
pt217	0.00382952	0.0572972	0.917174	0.013706
pt218	0.0272755	0.641281	0.103894	0.0341122
pt219	0.00680265	0.0782824	0.914915	5.4e-271
pt21C	0.0106088	0.0553836	0.920057	0.01296
Pt22	0	0.0557878	0.892382	3.86e-223
pt221	0.0112561	0.128048	0.845257	6.76e-175
pt225	0.0990915	0.710809	1.29e-42	0.0882495
pt226	0.00939982	0.165627	0.812897	9.3e-159
pt22640	0.00261288	0.0362733	0.961114	4.18e-35
pt22A	2.4e-153	0.934597	0.0239939	0.0315039
pt22B	0.0817807	0.396435	3.86e-171	0.327079
Pt23	0.0112317	0.0438641	0.858411	0.0620057
pt231	0	0.0505206	0.913294	0.00588011
pt232	0	0	0	1
pt233	0.0196957	0.120563	0.587631	0.189421
pt234	0.00996352	0.143771	0.826479	0.0197866
pt235	4.94065645841247e-324	0.206671	0.704933	0.0796821
pt236	0.196402	0.602584	0.0988755	0
pt237	0.00368991	0.068288	0.875725	0.0339769
pt238	0.0994043	0.701171	7.67e-08	0.111926
pt239	0.0035603	0.0813662	0.880565	0.0142405
pt23A	0.199347	0.457642	0.140901	0.202109
Pt24	0.00316928	0.0901692	0.848845	0.0553177
pt240	0.00507232	0.154559	0.603293	0.21258
pt242	0.0117759	0.133233	0.813873	0.0166555
pt244	0.459086	0	0	0.540914
pt245	0.0338818	0.621839	0.204223	0.0381861
pt246	0.0361772	0.21005	0.569032	0.137278
pt2472	0	0.0715962	0.850564	0.0363323
pt24C	0	0.0692842	0.916492	3.72e-34
Pt25	4.94065645841247e-324	0.555015	0.329912	0.0591725
pt252	0	0.0988109	0.805615	0.0683715
pt254	0.0234883	0.0394105	0.879697	0.0574039
pt255	0.00365254	0.0381418	0.945439	0.00598999
pt256	0	0.0452939	0.887866	0.0486935
pt257	3.31e-207	0.0125914	0.953386	0.0236789
pt259	0	0.124863	0.875137	2.55e-24
pt25A	0.0734282	0.050441	0.757893	0.10872
pt25C	0.03879	0.169597	0.717804	0.0598492
Pt26	0.00154161	0.0376964	0.953596	4.95e-47
pt260	0.0128856	0.12638	0.844227	2.56e-23
pt261	0.141722	0.53063	0.210946	5.19e-26
pt262	0	8.11e-298	0.966259	0.0337406
pt266	0.000637978	0.0636614	0.862635	0.0504474
pt267	1.23e-175	0.11038	0.832448	0.0515279
pt268	0.00819849	0.045258	0.90798	0.0156688
pt26C	0	0.172433	0.799608	0.0225662
pt26E	0.00462555	0.0577905	0.898767	0.0323435
Pt27	0.00166454	0.0241086	0.956275	0.0142862
pt273	6.82e-38	1.21e-104	0.0922822	0.904709
pt274	0.00673547	0.149921	0.765998	0.042947
pt275	0.144945	0.855055	0	0
pt276	0.00166288	0.0314723	0.929789	0.0222017
pt278	0.00508669	0.0754697	0.884644	0.0115101
pt279	0.00661584	0.767047	0	0.226337
Pt28	1.07e-85	0.141085	0.79578	0.0473662
pt280	3.14e-67	0.123542	0.793491	0.0829672
pt281	2.47032822920623e-323	0.693703	0.0852461	0.119736
pt282	0.0249857	0.257751	0.569942	0.0264597
pt284	0.0141328	0.107381	0.865798	0.0126878
pt285	0.13556	0.573983	0.196379	0.0381107
pt287	0.00665812	0.036939	0.914186	0.0195144
pt28A	0.0115101	0.132359	0.737913	0.0885275
pt28D	1.04e-286	0.133241	0.707847	0.113807
Pt29	0.101695	0.748922	0.00892057	0.0972263
pt290	0.0364368	0.68383	0	0.221499
pt291	0.04558	0.0683981	0.820823	0.0543698
pt292	0.17183	0.765185	0	0.0629852
pt293	0.0150992	0.257413	0.727488	9.14e-46
pt294	0	0.187253	0.732079	0.0413848
pt295	0.00974103	0.0613584	0.879255	0.0386037
pt297	1.39e-219	0.109577	0.842568	0.0298133
pt298	0.0261951	0.24716	0.14512	0.504161
pt29C	0	0.208334	0.662165	0.0869468
pt2E	0.00804524	0.114634	0.783061	0.0942595
Pt3	0.000630726	0.0111085	0.920545	0.0575529
Pt30	8.1e-201	0.0867638	0.864236	0.0308564
pt300	0.0112754	0.0201262	0.949226	0.0193726
pt301	0.13578	0.436876	8.54733567305357e-322	0.352242
pt302	0.0148968	0.101904	0.811973	0.0661137
pt306	0.257924	0.566363	0.175713	4.5e-237
pt308	9.42e-195	1	0	0
pt3086	0.0115406	0.310551	0.425759	0.160684
pt309	0	0.766844	0.233156	1.33397724377137e-322
Pt31	0.0115544	0.0198234	0.91698	0.0465031
pt310	0	0.257103	0.735457	9.69e-32
pt311	0	0.669278	0.0720378	0.217048
pt312	0	0.367703	0.325586	2.96439387504748e-322
pt314	0.00990491	0.0536552	0.892693	0.0354382
pt3156	0	1	0	0
pt316	0.16981	0.590988	0.118002	0.1212
pt31A	0.251254	0.0234911	0.574372	0.115877
Pt32	0	0.0728425	0.923456	0.0037018
pt32A	0.414839	0.416563	6.36e-240	0.142195
Pt33	0.00547307	0.0476272	0.791206	0.147162
pt33A	0.0310435	2.95e-118	0.932897	0.0283837
pt33C	0.00813834	0.00231805	0.94874	0.037073
Pt34	0.242321	0.324856	0.0499349	0.101878
pt3484	0	0.0550702	0.912118	0.0252955
pt34A	0.0529216	0.0263843	0.835386	0.0792529
Pt35	2.28e-249	0.16565	0.766392	0.0548868
pt3549	0	0.0896334	0.901339	1.15e-83
Pt36	0.0149323	0.0163199	0.968748	1.48219693752374e-323
pt3665	0.019282	0.187216	0.613743	0.15603
Pt37	0.000630978	0.0333287	0.934329	0.0279058
pt37B	0.00626691	0.626644	3.23e-300	0.0873616
Pt38	5.21e-96	0.126619	0.726275	0.147106
pt39	0.00088006	0.0104648	0.922017	0.0533342
pt3C	0.0162787	0.133905	0.784275	0.0441057
pt3D1	0.112191	0.170157	0.595617	0.0593964
pt3D2	0.0705642	0.29808	0.375906	0.222214
Pt4	1.32e-212	0.0140934	0.955026	0.0192496
pt40	0.0186334	0.05783	0.869459	0.0428824
pt4018	4.94065645841247e-324	0.167431	0.726305	0.103938
pt4035	0	0.069819	0.88315	0.014528
pt4045	0.00763877	0.0435861	0.868279	0.0738902
pt4046	0.00649972	0.0460712	0.802665	0.128562
pt4077	0.000952822	0.00348136	0.976245	0.0193205
pt4083	0.00869026	0.0196551	0.971655	9.9e-66
pt4091	0.00583009	0.0658655	0.88581	0.0234813
pt4092	1.33e-69	0.0120255	0.28002	0.698614
pt41	0.0126874	0.14122	0.773702	0.0279971
pt41A	0.0773234	0.624558	0.0129902	0.151641
pt42	0.0206904	0.1185	0.778525	0.0722677
pt42E	0.0389579	0.154539	0.705644	0.0317892
pt45C	0.239431	0.424964	9.99e-36	0.110059
pt45E	0.0040023	0.0532238	0.920029	0.00254803
pt4631	6.03e-52	0.018973	0.972144	7.34e-94
pt4691	0	0.0617626	0.210962	0.712323
pt4744	0	0.0419695	0.912738	0.039225
pt47A	7.45e-264	0.0159788	0.939997	0.0440239
pt47D	0.00683616	0.187939	0.764624	0.0242952
pt4810	0.00172252	0.0387688	0.932528	0.0244186
pt4880	0.067954	0.321703	0.364709	0.145434
pt4941	0.179073	0.580587	1.39e-278	0.149632
pt4949	1.52e-305	0.122468	0.81391	0.0405779
pt49E	0.00306239	0.0549928	0.875563	0.0562419
pt4D	0.194769	0.237436	0.297146	0.0921218
Pt5	0.00750551	0.0920828	0.824618	0.0757938
pt5038	0	0.208684	0.730556	0.020304
pt50A	2.45e-21	0.0432002	0.91439	0.0423624
pt50C	0	0.0404323	0.921586	0.0379817
pt5118	0.15651	0.601313	1.43279037293961e-322	0.101806
pt53A	0.0206011	0.119722	0.788473	0.0699368
pt53D	2.33e-285	0.196095	0.711282	0.0660951
pt54A	0.065529	0.0630609	0.792662	0.0787477
pt54C	0.023501	0.0179282	0.826941	0.0898763
pt5784	0	0.418686	2.64e-274	0.340119
pt5934	4.56e-149	0.13074	0.720633	0.0769584
pt5A	0.0438053	0.225729	0.671166	0.0503136
Pt6	0.000993425	7.58e-68	0.967542	1.16e-130
pt6126	0	0.0586904	0.919833	0.0214768
pt6161	0	0.025574	0.961892	3.07e-31
pt6336	0	0.11067	0.757267	0.132063
pt6494	0.00183583	0.0819554	0.893174	0.0168491
pt6689	0	1	0	0
pt6721	0.0255658	0.139899	0.778029	2.47032822920623e-323
pt6819	0	0.0457924	0.894121	0.0600862
pt6842	0	3.14e-49	0	0
pt6B	0.0744563	0.280775	0.522074	0.122695
Pt7	0.0106826	0.0352169	0.933453	0.0134347
pt7357	0	0.0453176	0.954682	4.93e-77
pt7623	0.00625271	0.0611442	0.773098	0.103864
pt7A	0.326197	0.429281	0.122973	0.121549
pt7D	0.0914333	0.403573	1.33397724377137e-322	0.437811
Pt8	1.39e-116	0.036107	0.369253	0.534788
pt8815	0	0.00602403	0.965124	0.018238
Pt9	0	0.0361717	0.92505	0.0384971
pt9298	0	0.056152	0.895606	0.00956323
pt9306	0.00166135	0.0367456	0.892013	0.0590565
pt9341	0.0964862	0.107897	0.682795	0.112821
pt9445	0.00467044	0.0929486	0.780519	0.120658
pt9449	0	0.0717675	0.865571	3.65e-60
pt9521	1.06e-91	0.0433851	0.940511	0.0161035
pt9699	0.00299129	1.53e-201	0.96502	0.0246587
pt9705	0.0355136	0.564767	1.51e-135	0.150842
pt9765	0.0686341	0.236452	0.406572	0.237284
pt99	4.94065645841247e-324	0.111951	0.799091	0.0577855
pt9A	0.199819	0.326775	0.180532	0.170928
pt9C	0.181081	0.482724	0.232299	0.0315177
pt9D	0.496998	0.193484	0.189008	0.104162
SD0346_T_N	0.00255578	0.0383083	0.921204	0.00754847
SD1494_T_N	0.00947558	0.0130932	0.892042	0.0823787
SD2051_T_N	0.118338	0.183743	0.116997	0.174174
SD2056_T_N	0.0087661	0.0900717	0.71355	0.163964
SD5038_T_N	0	0.131464	0.769044	0.0552964
SD5118_T_N	0.135126	0.399849	0.0858751	0.0584551
SD5934_T_N	0.00884517	0.116721	0.769178	0.032675
SD6336_T_N	0.0253462	0.0603404	0.810686	0.101774
SD6494_T_N	0.00430376	0.0905983	0.830466	0.0431437
SD7357_T_N	4.28e-44	0.0462343	0.953766	1.02e-34

## Sheet: Table S7
Table S7 The extracted 3 mutational signatures and their mutational activities in the pooled NSCLC cohort
Sample ID	Signature 1	Signature 4	Signature 7
1	0.684688	0.121801	0.193511
2	0.396083	0.507691	0.0962255
3	2.4304e-12	1	2.4304e-12
4	0.523175	0.345971	0.130854
5	0.520603	0.227251	0.252146
6	0.53513	0.266348	0.198522
7	0.323916	0.45026	0.225824
8	0.176051	0.802069	0.0218801
9	0.541931	0.331866	0.126203
10	0.412652	0.291229	0.296118
11	0.6578	0.0994381	0.242762
12	0.115724	0.0234365	0.86084
13	0.74049	0.0814691	0.178041
14	0.355955	0.44305	0.200994
15	0.312306	0.583452	0.104242
16	0.744666	0.089583	0.165751
17	0.696144	0.303856	6.68137e-13
18	0.135517	0.646676	0.217808
19	0.0965941	0.824675	0.078731
20	0.202126	0.705931	0.0919424
21	0.266117	0.434585	0.299299
22	0.376607	0.57764	0.045753
23	0.130864	0.673759	0.195377
24	0.742139	0.0724033	0.185458
25	0.258636	0.710972	0.0303922
26	0.106682	0.78395	0.109368
27	0.321368	0.6369	0.0417317
28	0.228601	0.303267	0.468132
29	0.161195	0.71288	0.125924
30	0.319745	0.564061	0.116194
31	0.30139	0.389455	0.309155
32	0.203674	0.634047	0.162279
33	0.330314	0.571089	0.0985963
34	0.23929	0.351302	0.409408
35	0.459365	0.0569453	0.483689
36	0.217256	0.684068	0.0986753
37	0.273507	0.559014	0.16748
38	0.535332	0.397842	0.0668255
39	0.438767	0.103208	0.458025
40	0.0879815	0.310934	0.601085
41	0.164121	0.694157	0.141722
42	0.295282	0.501246	0.203472
43	0.163933	0.698814	0.137253
44	0.116431	0.202207	0.681362
45	0.213631	0.152729	0.63364
46	0.396833	0.466565	0.136602
47	0.116739	0.616204	0.267056
48	0.468418	0.106876	0.424706
49	0.189981	0.179685	0.630334
50	0.239756	0.481445	0.278799
51	0.0496995	0.651594	0.298707
52	1.58826e-14	0.244563	0.755437
53	0.147259	0.472911	0.37983
54	0.185877	0.696725	0.117398
55	0.218554	0.6979	0.0835463
56	0.352728	0.548661	0.0986107
57	0.289111	0.676647	0.0342414
58	0.289604	0.215426	0.494969
59	0.738201	0.181101	0.0806981
60	0.875522	0.0229147	0.101563
61	0.18027	0.67264	0.14709
62	0.0502481	1.63471e-15	0.949752
63	1.88622e-13	0.307834	0.692166
64	0.101527	0.663596	0.234877
65	0.280288	0.0321452	0.687567
66	0.393721	0.504204	0.102075
67	0.234034	0.247001	0.518965
68	0.122617	0.648901	0.228483
69	0.503513	0.169145	0.327341
70	0.111967	0.141294	0.746739
71	0.0607459	0.188209	0.751045
72	0.435936	0.155535	0.408529
73	0.110859	0.633938	0.255204
74	1	5.42952e-15	4.53962e-09
75	0.115399	0.298334	0.586267
AL4602	0.337945	0.5576	0.104455
AU5884	0.546206	0.404161	0.0496335
BL3403	0.725844	0.11786	0.156296
CA9903	0.228863	0.697987	0.0731493
CU9061	0.528049	0.312406	0.159545
DI6359	0.273385	0.627794	0.0988212
DM123062	0.315756	0.535172	0.149073
FR9547	0.276201	0.333681	0.390118
GR0134	0.319553	0.572283	0.108164
GR4788	0.300509	0.61936	0.0801309
HE3202	0.515179	0.302249	0.182572
JB112852	0.178772	0.673859	0.147369
KA3947	0.636235	0.363765	4.61426e-11
LO3793	0.374627	0.601842	0.0235312
LO5004	0.237896	0.540232	0.221872
M4945	0.707601	0.126011	0.166388
MA7027	0.217842	0.557721	0.224437
NI9507	0.620174	0.208616	0.17121
R7495_2	0.389473	0.491845	0.118681
RH090935	0.457829	0.481398	0.0607725
RI1933	0.410604	0.563551	0.0258445
RO3338	0.695379	0.0641427	0.240479
SA9755	0.584755	0.395056	0.0201886
SB010944	0.56417	0.118	0.31783
SC0899	0.238649	0.674425	0.0869269
SC6470	0.663636	0.236749	0.0996144
SR070761	0.329606	0.408249	0.262145
TU0428	0.78673	0.108848	0.104422
VA1330	0.232692	0.717978	0.0493292
VA7859	0.237805	0.694345	0.06785
WA7899	0.648275	0.173269	0.178456
Y2087	0.572224	0.381207	0.0465691
ZA6505	0.478359	0.26426	0.25738
ZA6965	0.745449	0.191367	0.063184
